# Supplementary material
Source: PubMed Central journal article supplement (PMC3387720)
Supplement: supp_pp.112.197525_197525Supplemental_text.pdf [file supp_pp.112.197525_197525Supplemental_text.pdf]

**Total 154 sequences (149 plant) All have DEAD or DExD**

56 At sequences (From Mingaetal2004) Not the two pseudogenes *AtRH54* and 55)

5 E. coli sequences

47 Rice best homologues

46 Maize best homologues (4 were added)

>AtRH01

MDSVVPWMRAPVDVSNVENCALDTLPCLNPCLKKALENMGISSLFPVQVAVWHETIGPGG  
FERDICVNSPTGSGKTLASYALPIVQLLASRPVRCRLRALVVLPTRDALQVKDVFDAIAPA  
VGLSVGSAVGQSSIAGEISQLIKTPKLDAGICYDPDDLSONLESASVDILVATPGRLMDHI  
NNTKGFTEHLRYLVVDETRLLREAYQSWLPTVLQTLTQTSDDSLFSPFTPFVPSAFGSL  
QTVRRQSVVERGFKGPYPRLVKMLVSATLTQDPSKLIQLDLHHPFLFMTTGGSRYLPEKL  
ECLRLICETGMKPVYLVALLKSWEGEKCIIFTSSVETTRRLCKLLNFFGDPKIKAKEYSG  
GLNQSLRSKELKAFRKGDIVQLVASDALTRGMDVKGVNTVINYDMPFFAKTFIHRAGR  
RAGQAGRCFTLLSNHEVRRFSKLLLEKVGSDSCPIYPIPTSLDSIRATYTPALEKLELV  
ESEAPKKGRQAFRHNSRTGNSQTKLNKPRSEA

>AtRH02

MATANPGRGGRRGGGAMDDDKLVFETTDGIEPITSFNMDGIKEDVLRGVYEEYGFKEKPSA  
IQQRVMPILQGRDVIQAQSGTGKTSMIALSVCQVVDTSREVOALILSPTRELATQTE  
KTIQAIGLHANIQAACIGGNSVGEDIRKLEHGHHVVSQVTPGRVCDMIKRRSLRTRAIKL  
LILDESDEMLSRGFKDQIYDVYRYLPPDLQVCLVSATLPHEILEMTSKFMTEPVKILVKR  
DELTLLEGIKQFFVAVEKEEKWFDLTLCDLYDTLTITQAVIFCNTKRVVYDYLSEKMRSHNFT  
VSSMHGDMPPQKERDAIMNEFRSGDSRVLITTDVWARGIDVQQVSLVINYDLPNNRELYIH  
RIGRSGRFRKGVAINFVKSDDIKILRDIEQYYSTQIDEMPMNVADLI

>AtRH03

MASTVGVPSLYQVPHLEISKPNKRSNCLSLSLDKPFFFTPLSLVRRTRRIHSSLLVPS  
AVATPNSVLSSEAFKSLGLSDHDEYDLGDNNNVEADDGEELAI SKLSLPQRLEESLEKR  
GITHLFP IQRAVLVPALQGRDIIARAKTGTGKTLAFGIP I IKRLTEEAGDYTAFRRSGR  
PKFLVLAAPTRELAKQVEKEIKESAPYLSTVCVYGGVSYTIQQSALTRGVVVVGT  
DLIEGRSLKLGVEVEYLVLDEADQMLAVGFEEAVESILENLP TKRQSMLFSATMPTWV  
ARKYLDNPLNIDLVDGQDEKLAEGIKLYAIATTSTSKRTILSDLITVYAKGGKTIVFTQT  
KRDADEVSLALSNSIATEALHGDISQHQRETLNAFRQ GKFTVLVATDVASRGLDIPNVD  
LVIHYELPNDPETFVHRSGRTGRAGKEGSAIIMHTSSQKRTVRSLE RDVGCHEFFIS  
VGDLLESSADQVVATLNGVHPDSIKFFSATAQKLYEEKGTDALAAALAHLSGFSQPPSSR  
SLLSHEKGVWTLQLIRDPTNARGFLSARSVTGFLSDLYRTAADEVGKIFLIADDRIQGAV  
FDLPEEIAKELLEKDVPEGNLSMITKLPPLQDDGPPSSDNYGRFSSRDRMPRGGGSSRGS  
RGGRRGSSRRGRDSWGGDDDRGSRSSGGSSWSRGGSSSRGSSDDWLI GGRSSSSSRAPS  
RERSFGGSCFICGKSGHRATDCPKRGF

>AtRH04

MAGSAPEGTQFDARQFDQKLNEVLEGEQDEFFTSYDDVHESFDAMGLQENLLRGIYAYGFE  
KPSAIQQRGIVPFC KGLDVIQQAQSGTGKTATFCSGVLQQLDFSLIQCALVLAAPTRELA  
QQIEKVMRALGDYLGVKVHACVGGTSVREDQRILQAGVHVVGTPGRVFDMLKRQSLRAD  
NIKMFVLDEADEMLSRGFKDQIYDIFQLLPKIQVGVFSATMPPEALEITRKFMSKPVRI  
LVKRDELTLLEGIKQFYVNVEKEEKLETLC DLYETLAITQSVIFVNTRRKVDWLTDKMRS  
RDHTVSATHGDMQNTDRIIMREFRSGSSRVLITTDLLARGIDVQQVSLVINFDLPTQPE  
NYLHRIGRSGRFRKGVAINFVTRDDERMLFDIQKFYNVVVEELPSNVADLL

>AtRH05

MAGQKQELPVSGEPLAVESPMNTNKKKKKSKKNKHTEENHEVEEVPQEV TNGVEEELS  
NKEKKKKRREEKESEKNKKKDVPEKKLEAEDLGESESEQQKVVVTGKGVEEAKYAALKTF  
FAE SNLPENVLDCCKTFEKPSPIQSHTWPFLLDGRDLIGIAKTGSGKTLAFGIPAIMHVLKKN  
KKIGGSKKNPTCLVLSPTRELAVQISDVLREAGEPCGLKSI CVYGGSSKGPQISAIRS  
GVDIVIGTPGRLRLDIESNVLRSLSDVSVVLDVLEADRMLDMGFEEPVRFILSNTNKVRQMV  
GVFSATWPLDVHKLAEQEFMDPNPKVIIGSVDLAANHDVMQIIEVLDERARDQRLIALLEK  
YHKSQKNRVLVFALYKVEAERLERFLQQRGWKAVSIHGNAQSERTRSLSLFKEGSCPLL  
VATDVAARGLDIPDVEVVINYTFPLTTEDYVHRIGRTGRAGKKGVAHTFFFTPLNKGLAGE  
LVNVLREAGQVVPADLLKFGTHVKKKESKLYGAHFKEIAADAPKATKITFDNSDDED

>AtRH06

MNNNNNNRGRFPFGIGAGPGDPNFQSRPNPPQPQQYLQSRTPFPQQPQPQPQQYLQS  
QSDAQQYVQRGYPQQIQQQQQQLQQQQQQQQQQEQQWSRRAQLPGDPSYIDEVEKTVQSE  
AISDSNNEDWKATLKLPPRDNRQTEDVTATKGNFEDYFLKRDLLRGIYEKGFEPKPSPI  
QEESIPIALTGSDILARAKNGTGKTAFACTPLEKIDPENNVIAVILVPTRELALQTSQ  
VCKELSKYLKIEVMVTTGGTSLRDDIMRLYQPVHLLVGTTPGRILDLAKKGVCVLKDCA  
VMDEADKLLSVEFQPSIEELIQFLPESRQILMFSATFPVTVKSFKDRYLKPYIINLMDQ  
LTLMGVTTYAFVEERQKVHCLNTLFSKLQINQSIIFCNSVNRVSELLAKKITELGYS  
CFYIHAKMVQDHRNRVFDHFRNGACRNLVCTDLFTRGIDIQAVNVVINFDFPRTSESYL  
HRVGRSGRFGHLGLAVNLVTYEDRFKMYQTEQELGTEIKPIPSLIDKAIYCQ

>AtRH07

MPSLMLSDKKEEKKMKKKMALDTPELDSKKGKKEQKLLKLSDSDEESEEKKKSKKKDKKRK  
ASEEEDEVKSDSSSEKKKSSKVKLGVEDVEVDNPNNAVSKFRISAPLREKLNKANGIEALF  
PIQASTFDMVLDGADLVGRARTGQKTLAFVLPILSLVNGPAKSKRKMGYGRSPSVLVL  
LPTRELAKQVAADFAYGGLSLSSCCLYGGDSYPVQEGKLRGVDIVVGTTPGRIKDHI  
EQNLDFSYLQFRVLDEADEMLRMGFVEDVELILGKVEDSTKVQTLFSLATLPSWVKNIS  
NRFKRDQKTIDLGVNDKMKASNSVRHIAIPCNKAAMARLIPDIISCYSSGGQTIIFAETK  
VQVSELSGLLDGSRALHGEIPQSQREVTLGAFRNGKFATLVATNVAARGLDINDVQLIIQ  
CEPPREVEAYIHRSGRTGRAGNTGVAVTLYDSRKS SVSRIEKEAGIKFEHLAAPQPDEIA  
RSGGMEAAEKVKQVCDSSVPAFLEAAKELLETSGLSAEVLAKALAKTAGFTI IKKRSL  
LTSMENYVTLHLEAGKPIYSPSFVYGLLRVLPDDKVEMIEGLSLTADKTGAVFDVKQSD  
LDFIAGAQSAGSMSLEVVKVMKPKLQEREPLPQKRFGGGGRGNRFGGGGGNRFGGGGGR  
RGGSGGRGQRY

>AtRH08

MNNRGRYPFGIGAGRGAFNPNPNYQSRSGYQQHPPQYVQRGNYAQNHQQQFQQAPSOPH  
QYQQQQQQQQWLRGQIPGGNSNGDAVVEVEKTVQSEVIDPNSEDWKARLKLPA  
PDRYRTEDVTATKGNFEDYFLKRELLMGIYEKGFERPSPIQEESIPIALTGRDILARAKNGTG  
KTA AFCIPVLEKIDQDNNVIAVIVPTRELALQTSQVCKELGKHLKIQVMVTTGGTSLK  
DDIMRLYQPVHLLVGTTPGRILDLTKKGVCVLKDCSVLMDEADKLLSQEFQPSVEHLISF  
LPESRQILMFSATFPVTVKDFKDRFLTNPYVINLMDLTLKGITQFYAFVEERQKIHCLN  
TLFSKLQINQSIIFCNSVNRVSELLAKKITELGYS CFYIHAKMLQDHRNRVFDHFRNGACR  
NLVCTDLFTRGIDIQAVNVVINFDFPKNAETYLHRVGRSGRFGHLGLAVNLITYEDRFNL  
YRIEQELGTEIKQIPPHIDQAIYCQ

>AtRH09

MISTVLRSSILGTSRRTLAASVTSINAALFHNLA PAAATVSDLANGATNVKSLPSNSSPF  
GVKVRDFHVKSVPSEFRSSIVSSAGFAAQEYAPSYENDGGIGDSESVGSSGGGDGLAIAD  
LGISPEIVKALKGRGIEKLFPIQKAVLEPAMEGRDMIGRARTGTGKTLAFGIPIDKIIK  
FNAKHGRGKNPQCLVLAPTRELARQVEKEFRESAPSLDTICLYGGTPIGQMQRELNYGID  
VAVGTTPGRIIDL MKRGALNLSEVQFVVLDEADQMLQVGF AEDVEIILQKLP AKRQSM  
MFSATMPSWIRSLTKKYLNNPLTIDLVDSDQKLDAGITMYSIAADSYGRASIIGPLVKEHGK  
GGKCI VFTQTKRDADRLAFGLAKSYKCEALHGDISQAQRERTLAGFRDGNF  
SILVATDVARGLDVPNVDLVIHYELPNNTETFVHRTGRAGKKSAILIHGQDQTRAVK  
MIEKEVGRSFNELPSIAVERGSASMFEGVGARS GSGGSGGGYGSYSSSGRSGGGSYGGY  
GGSSGRSGGGGSYGGSGSSSRYS GSGSDRSSGFGSFGSGSSGGFSDRSSQSSGRSS  
FGGFGSNDGKRSY

>AtRH10

MEEENEVVKTF AELGVREELVKACERLGWKNPSKIQAEALPFALEGKDVIGLAQTGSGKT  
GAFaipilqALLEYVYDSEPKKGRDPDPAFFACVLSPTRELAIQIAEQFEALGADISLRC  
AVLVGGIDRMQQTIALGKRPHVIVATPGRLWDHMSDTKGFSLKSLKYLVLDEADRLLNED  
FEKSLNQILEEIPLERKTF LFSATMTKKVRKLQRACLRNPVKIEAASKYSTVDTLKQYR  
FVAAKYKDCYLVYILSEMPESTSMIFTRTCDGTRFLALVLRSLGFRAIPISGQMTQSKRL  
GALNKFKGECNIVCTDVASRGLDIPSVDVVINYDIPTNSKDYIHRVGR TARAGRSVG  
VGLSLVNQYELEWYIQIEKLIKGLPEYPAEEDEVL SLLERVAEAKKLSAMNMKESGGRKRR  
GEDDEESERFLGGNKDRGNKERGGNKDKKSSKFKR

>AtRH11

MSASWADVADSEKAVSQSKPPYVPHLRNRPSEPVAAPLPQNDHAGYGGQPAGSRWAPPS

SGGGGASGGGYRNDGGRTGYGYGAGGGGGGGGGWNNRSGGWDRRERREVNPFGDDAELEPV  
FTEQENTGINFDAYEDIPVETSGGDVPPPVNTFADIDLGDALNLRCKYVRPTPVQRH  
AIPILLAERDLMACAQTGSGKTA AFCFPIISGIMKDQHVERPRGSRAVYPPFAVILSPTRE  
LACQIHDEAKKFSYQTGVKVVVAYGGTPIHQQLRELERGCDILVATPGRLNDLLERARVS  
MQMIRFLALDEADRMLDMGFEPQIRKIVEQMDMPRGRVQTMLFSATFPSQIQRLAADFM  
SNYIFLAVGRVGSSTDLITQRVEFVQESDKRSHLMDLLHAQRETQDKQSLTLVVFVETKRG  
ADTLENWLCMNEFPATSIHGDRTOQEREVALRSFKTGRTPILVATDVAARGLDIPHVAHV  
VNFDFLPNDIDDYVHRIGRTGRAGKSGIATAFFNENNAQLARSLAELMQEANQEVPEWLTR  
YASRASFGGGKKRSGGRFGGRDFRREGSRSRGGGGGGGGSDYYGGGGYGGGGYGGAPS  
GGYGAGVTSAWD

>AtRH12

MNTNRGRYPPGVGTGRGAPPNDYHQSYRQQQPPQDQQYVQRGYSQNPQQMLQQHQQQ  
QQQQQWSRRPQLPGNASNANEVVQOTTQPEASSDANGQDWKATLRLPPDTRYQTADVTA  
TKGNFEDYFLKRDLLKGIYEKGFEPSPIQEESIPIALTGSDILARAKNGTGKTGAFCI  
PVLEKIDPNNNVIQAMILVPTRELALQTSQVCKELSKYLNIQVMVTTGGTSLRDDIMRLH  
QPVHLLVGTGPRILDLTKKGVCVLKDCAMLVMDEADKLLSAEFQPSLEELIQFLPQNRQF  
LMFSATFPVTVKAFKDRHLRKPYPVINLMDQLTLMGVTQYYAFVEERQKVHCLNTLFSKLQ  
INQSIIFCNSVNRVELLAKKITELGYSIFYIHAKMVQDHRNRVHFHEFRNGACRNLVCTDL  
FTRGIDIQAVNVVINFDFPRTSESYLHRVGRSGRFGHLGLAVNLVTYEDRFKMYQTEQEL  
GTEIKPIPSNIDQAIYCQ

>AtRH13

MVTGDKESSLMKKRNRKSHKRKREEDFERIDSLPWSSSIPIGEDDEGESFSTLFSGSGQL  
DGGFLSLEEIDEADYHLTLPTIESEITERKQSPEDDDDTNETVDEMI EGEEAEEDGEGRD  
DEDEDEDEETRKKKAKRNRKKEKKKKEKKKKKQKINEAAKNQDASAVSCDGDVTVEEQV  
EEEEIPPEFSAWSSMRLHPLLKMSIYRLDFKEPTKI QKACFNVAAYQKDVIGAAETGSG  
KTLAFLGLPILQRLLDEREKVGKLYALKGEEAQKYAADGYLRALITPTRELALQVTEHLE  
NAAKNLSVKVVPVGGMFSEKQERRLKEKPEIVVATPGRLWELMSAGEKHLVELHLSLFF  
VLDEADMVERGHFRELQSILDLLPVTDKPNEGKTQTVKSNDTVNLNPKKRQTFVFSAT  
IALSSDFRKKLKRGSKSKQSSSSEVNSIEVL SERAGMRDNVAIDLTTTSLAPKIEES  
FIKCEEKEDAYLYILSVHGQGRITVFCSTVTDLRHISGLLKLGLDVCTLFSEMKQRA  
RLKSIDRFRASENGILIATDLVARGIDIKNVRTI IHYKLPHSAEVYVHRCGR TARAFADG  
CSIALIEPNETSKFYTLCKSFSMESVKIFPLDNSYMPAVRKRLYLARQIYEIERKGSREN  
ADRTWLKKAESMELELDDEESEEEERVDNVRQRKATSARLNKLKEELSTLLSHMPQPKKF  
SGRYFAGVGVSTLMQNQFVELKKQQAQMIGGDIKRRKLVVINQNCIEPLQAFVLVVTR  
C

>AtRH14

MAATAAASVVRYAPEDHTLPKPWKGLIDDRGTGYLYFWNPETNVTQYEKPTPSLPPKFSPA  
VSVSSSVQVQQTDAYAPPKDDDKYSRGSERVS RFSEGGRS GPPYSNGAANGVGD SAYGAA  
STRVPLPSSAPASELSPEAYSRHEITVSGGQVPPPLMSFEATGFPPPELLREVLSAGFSA  
PTPIQAQSWPIAMQGRDIVAIAKTGSGKTLGYLIPGFLHLQIRNDSRMGPTILVLSPTR  
ELATQIQEEAVKFRSSRISCTCLYGGAPKGPQLRDLERGADIVVATPGRLNDILEMRR  
SLRQISYLVLDEADRMLDMGFEPQIRKIVEKEIPTKRQTLMYTATWPKGVRKIAADLLVNP  
AQVNI GNVDL VANKSITQHIEVVAPMEKQRRLEQILRSQEPGSKVIIFCSTKRMCDQLT  
RNLTRQFGAAAIHGDKSQPERDNVLNQFRSGRTPVLVATDVAARGLDVKDIRAVVNYDFP  
NGVEDYVHRIGRTGRAGATGQAFTFFGDQDSKHASDLIKILEGANQRVPPQIREMATRGG  
GGMNKFSRWGPPSGGRGRGGDSGYGGRGSFASRDSRSSNGWRERERSRSPERFNRAPP  
SSTGSPRSFHETMMMHR

>AtRH15

MGDARDNEAYEEELLDYEEDEKVPDSGNKVNGEAVKKGYVGIHSSGFRDFLLKPELLRA  
IVDSGFEPHSEVQHECIPQAILGMDVICQAKSGMGKTAVFVLSTLQQIEPSPGQVSALVL  
CHTRELAYQICNEFVRFSTYLPDTKVSVFYGGVNIKIHKDLLKNECPHIVVGTGPRVLAL  
AREKDL SLKNVRHFILDECDKMLESLDMRRDVQEIFKMTPHDKQVMMSATLSKEIRPVC  
KKFMQDPMEIYVDDEAKLTLHGLVQHYIKLSEMEKTRKLNLDLDFNQVVFVKS VSR  
AAELNKL LVECNFPSICIHSGMSQEERLTRYKSFKEGHRILVATDLVGRGIDIERVNIV  
INYDMPDSADTYLHRVGRAGRFGTKGLAITFVASASDSEVLNQVQERFEVDIKELPEQID  
TSTYMP

>AtRH16

MGKTKLKPVEDVNSEVVDEVEKAEVEEQNRNDREQEEEQKEEEAPKSFEELGLDSRLIRA  
LTKKGIKPTLIQQSAIPYILEGKDVVARAKTGSFKTLAYLLPLLQKLFSAHSVSKKKLA  
PSAFILVPSRELCQQVYTEVSSLIELCRVQLKAVQLTSSMSASDMRNALAGLPEILVSTP  
ACIPKCF AAGVLEPTAVSESL SILVLDEADLLSYGYEDNLRSVTSIIPRRCQCLLMSAT  
TSSDVEKLLKLLILHNP IVLTLTEDNDKEEAVPSNVQQFWISCSAQDKLLHILALLKLEVV  
QKKILIFINTIDMGFRLKLFLEKFGIKSAILNGELPQNSRLHILEQFNAGLFDYLIATDD  
NSQTKKQKEEAKGEANKENKKNKRSPKLD AEFVVRGIDFKKVHTVINFDMPQSVTGY  
IHRIGRTGRAYSSGSSVSLISPDEMEGFEDIKSFSLASDKNKDIDIITPFPLLTENAVESL  
RYRAEDVAKSVTKI AVRESRAQDLRNEI INSEKKAHF EANPRDL DLLRHDKPLSKTAPA  
PHLKDIPEYLVDAKTQEASKMVKLARAAMGNTRRSGGGGRNNKKNKR SRKGS DPLKTFN  
PNGSKRGAVGQKDGKDSSTKKQKTV

>AtRH17

MKRAQQSARETKQEAKDASKAKSGLFASCSFSSLGLDTKLSDQLKERMGEAPTIVQAQA  
IPVILSGRDVLVNAPTGTGKTIAYLAPLIHHLQGHSPKVD RSHGTFALVIVPTRELCLQV  
YETLEKLLHRFHVIWPGYVMGGEKKAKEKARLRKGISIL IATPGRLLDHLKNTASFVHKN  
LRWVIFDEADSILELGYGKEIEQI IKLLGSGQNEQGEEDDIVPKGIQKQNL LLSATLNDK  
VNDLAKLSLDDPVMIGLDNNTKLQONLSIESPAAPSDAEDMVIHVNK SANPLSEYGI PS  
QLVQRYLRVPCGARLVALLSVLKNL FEREASQKV VVFFSTRDAVDFHYSLLSEFQWPPNS  
ETEEEGTKELFLKCKTFRLLHGSMEQEDRRSAFGTFKTEKQAVLLSTDVAARGLDFPKVRC  
IIQYDCPGEATEYVHRVGR TARIGEKG EALLFLQPIE IDYLKELKKHGASL TEYPLMKVL  
DKFPIPGNMPRIKKVLSLESHPWV I SLQRALES LTYAEPKMKSLAKNAFVSWVRGYAAHK  
GELKSI FVVKKLHLGHVAKSFALREQPSLVGKSHHKETMKRKRDERQKQGGKRRKMSG  
TGNRSTQKT

>AtRH18

MDSSANINKALTETRFSDLEPPLSGDIEEALNQSDFEFCTPVQAATIPLLCSYKDVAVDA  
ATGSGKTLAFVPLVEILRRSTSFPPKPHQVMGVIISPTRELSTQIYNVAQPFVSTLANV  
NSVLLVGGREVKADMKIIIEEGCNVLIGTPGR LSDIMERMEILD FRNLEILILDEADRLL  
EMGFQRQVNYIISRLPKQRRTGLFSATQTEGVEELAKAGLRNPVRVEVRAKSKSESSQQL  
TNSKTPSGLHLEYMECEADKSSQLVDLLIKNSDKKLVFFMTCASVDYWGLVLSKIPAL  
KSISLIP IHGDMQNARDKALASFTKASSGALLCTDVAARGLDIPGIDYVVQYDPPQDPN  
MFNHRAGR TARLGRQGRAIVFLLPKEEAYVEFMRI RRVPLEERKCS EDASDVIP IIRSA  
MKDRAVMEKGLKAFVSVFRAYKEHHC SFIFRWKDL EIGKLAMGYGLLYLPSMSEVKQHRL  
SSEGFTPV EGVKFE EIKFKDKYREKQRQONLQVRKEKRQE EKKKGGKRKRVDASASNDPK  
KASRKLTKGQRQTIQTAEDEEVMDRDYKLMIKVKKGLIKEDEYERLTGDDDLF

>AtRH19

MAGSAPEGTQFDTRQFDQRLNEVL DGQDEFFTSYDEVHESFDAMGLQENLLRGIYAYGFE  
KPSAIQQRGIVPFCKGLDVIQQAQSGTGKTATFCSGVLQQLDYALLQCQALVLAPTRELA  
QQIEKVMRALGDYQGVKVHACVGGT SVREDQRILQAGVHV VVGT PGRVFDMLRRQSLRPD  
CIKMFVLDEADEMLSRGFKDQIYDIFQLLPKIQGVVFSATMPPEALEITRKFMSKPVRI  
LVKRDELTLLEGIKQFYVNVEKEDWKLETCLDLYETLAITQSVIFVNTRR KVDWLTDKMRS  
RDHTVSATHGMDQNT RDIIMREFRSGSSRVLITTDLLARGIDVQVSVLVINFDLPTQPE  
NYLHRIGRSGRFRKGVAINFVTLDDQRMLFDIQKFYNV VVEELPSNVADLL

>AtRH20

MSRYDSRTGDSTSYRDRSDSGFGGTSSYGSSGSH TSSKKDNDGNESPRKLDLDGLTPFE  
KNFYVESPAVAAMTDTEVEEYRKLREITVEGK DIPKPVKSFRDVGFPDYVLEEVKAGFT  
EPTPIQSQGWPMAMKGRDLIGIAETGSGK TSYLLPAIVHVNAQPMLAHGDGP IVLVLAP  
TRELAVQIQQEASKFGSSSIKTTTCIYGGVPKGPQVRDLQKGV EIVIATPGR LIDMMESN  
NTNLRRVTYLVLDEADRMLDMGFDPQIRKIVSHIRPDRQTLYWSATWPKEVEQLSKKFLY  
NPYKVIIGSSDLKANRAIRQIVDVI SESQKYNKLVKLEDIMDGSRI LVFLDTKKGCDQI  
TRQLRMDGWPALS IHGDKSQAERDWVLS EFRSGKSPIMTATDVAARGLDVKDVKYVINYD  
FPGSLEDYVHRIGRTGRAGAKGTAYTFFTVANARFAKELTNILQEAGQKVSP ELASMGRS  
TAPPPPGLGGFRDRGSRGWS

>AtRH21

MKRTINEVVGSTSVNTLDSSIAKKPVFLTKKQREELALKRRQDQISEQRVREQLGRPEP  
ETEDVSNGDTNRDKDRDRDRDRERDRDRDRDRDRDRDRDRDRDRDRDRDRERERDRERDR

RERDREPDRRNREKEREVEEVKAREKARVEKLVEREKEKELDAIKEQYLGGKKPKKRVIRP  
SEKFRFSFDWENTEDTSRDMNVLYQNPHEAQLLFGRGFRAGMDRREQKKQAAKHEKEMRD  
EIRKKDGIIVEKPEEAAAQRVREEAADTYDSFDMRVDRHWSDKRLEEMTERDWRIFREDFN  
ISYKGSRIIPRPMRSWEESKLTSELLKAVERAGYKKPSPIQMAAIPLGLQQRDVIIGIAETG  
SGKTAAFVLPMLAYISRLPPMSEENETEGPYAVVMAPTRELAQQIEEETVKFAHYLGFVRV  
TSIVGGQSIIEEQGLKITQGCEIVIATPGRLIDCLERRYAVLNQCNYVVLDEADRMIDMGF  
EPQVAGVLDAMPSSNLKPENEEELDEKKIYRTTYMFSATMPPGVERLARKYLNRNPVVVT  
IGTAGKTDLISQHVIMMKESEKFFRLQKLLDELGEKTAIVFVNTKKNCDISIAKNLDKAG  
YRVTTLHGKKSQEQREISLEGFRAKRYNVLVATDVVGRGIDIPDVAHVINYDMPKHIEMY  
THRIGRTGRAGKSGVATSFLTLDHTEVFYDLKQMLVQSNSAVPPELARHEASRFKPGTVP  
DRPPRHSDTVYIN

>AtRH22

MILSRSVSVLHLCGVSSSAPSKLLSQRFKVSFALAYGSSVSFRLSSLNRSRDKWVRGFAS  
ATEAEVEKKGNDTFFADHTVSWKSLGLSDNVSIALRDSGFRPSLTQAVCIPSILSGKDV  
IVAAETGSGKTHGYLAPIIDQLTNTALDSEVTNREERPFPLKNIISLILCPNVMLCEQVVR  
MVNGLVDEDEGNPLLRVEAVCGSQGWPDRLPDIIVSTPAALLNNIEPKNRRLLEFLRCVKY  
VVFDEADMLLCSGFQNQIIRLINMLRFDEKQVSRLAKSNLGRPMEIDASVPQIDLENEEDD  
AEFDEGSISEEDEEEEEEEYLDLIAQMPVSVEAEAGSDTKKGWRRVRKIYTRSKQYIFIAA  
TLPVNGKKTAGGILKHMFDQAVVWSGNFLHRNSPRLKQKWVEVTVDSQVDALIEAVKNNN  
NTNTERTMVFANTVEAVEAVADILEKASIQCYRYHKNHKLDERANILADFRETGGVFVCT  
DAAARGVDVPNVSHVIQADFASSAVDFLHRIGRTARAGQYGTVTSLYTEANRDLVEAIRE  
AVKMGQPVETAFAFRKRGRFNKVKKRAFLKAEAEAEPEQAVRY

>AtRH23

MAGMASDGTQYDPRQFDTKMNAIILGEEGEETFYTNVDEVCDSFDAMELQPDLLRGIYAYG  
FEKPSAIQQRGIIIPFCGLDVIQQAQSGTGKTATFCSGVLQQLDISLVQCQALVLAPTRE  
LAQQIEKVMRALGDYLVGKAQACVGGTSVREDQRVLQSGVHVVVGTGPRVFDLLRRQSLR  
ADAIKMFVLDDEADEMLSRGFKDQIYDIFQLLPKQVGVFSATMPPEALEITRKFMNKPV  
RILVKRDELTLLEGIKQFYVNVKKEEWKLETLCDLYETLAITQSVIFVNTRRKVDWLTDKM  
RSRDHTVSATHGMDQNTDRIIMREFRSGSSRVLITTDLLARGIDVQQVSLVINFDLPTQ  
PENYLHRIGRSGRFRGKGVAINFMTSEDERMMADIQRFYNVVVEELPSNVADLL

>AtRH24

MSNRKFGMEGFGINRQTSYSFERSQAPQRLYVPPSSRGGDNSEDADLDNIDYMENEEAE  
DIEEGGSAAASGGEVDEIDPLDAFMEGIHQEMKSAPPPKPEKLERKDDDDDPVESYLK  
AKKDLGLTLAADALNAGYNSDEEVYAAAKAVDAGMLDYSDDDNPVVDKRKIEPITALDH  
SSIDYEPINKDFYEELESISGMTEQETTDYRQRLGIRVSGFDVHRPVKTFEDCGFSSQIM  
SAIKKQAYEKPTAIQCQALPIVLSGRDVIIGIAKTGSGKTAAFVLPIMIVHIMDQPELQRDE  
GPIGVICAPTRELAHQIFLEAKKFSKAYGLRVSAVYGGMSKHEQFKELKAGCEIVVATPG  
RLIDMLKMKALTMMRASYLVLDEADRMFDLGFEPQVRSIVGQIRPDRQTLFSATMPWKV  
EKLAREILSDPIRVTVGEVGMANEDITQVVNVIIPSDAEKLPWLEKLPGMIDEQDVLVFA  
SKKATVDEIEAQLTLNSFKVAALHGDKDQASRMETLQKFKSGVHHVLIATDVAARGLDIK  
SLKATVVNYDIAKMDMHHVHRIGRTGRAGDRDGVAYTLVTQREARFAGELVNSLVAAGQNV  
PPELTDLAMKDGRFKSKRDGRKGGKGRGGGGNKGVRGVDFGLGIGFSSESSRTPSSKA  
APSRSGAINSVRTGVMAQFKNSFVAATPSNPQNQAYPNKRP.SLMGFVSGGTIGGDMGRTQ  
SQAPPVAPTQNASSHNSQNHSSQSENPRERKRRSGWDN

>AtRH25

MNSDGPKSGKKREIRAKLVKLLTSDDEDGSGKLVKDNNKSLKRGREGKSDVDEPLIKKPA  
STTPLVTQIAKTSDSYLSKTRFDQFPLSPLTLKGIEDAGFKTMTVVQEATLPLILQKDI  
LAKAKTGTGKTVAFLPSIEAVIKAPPASRDNRHPPIIIVLVVCPRELACQAAAANILL  
KYHPSIGVQVVIIGTKLPTEQRRLOKSPCQILVATPGRLKDHIDNTSGFATRLMGVKVLV  
LDEADHLLDMGFRREIERIIAAVVKQRQTFLLSATVSDVVRQICHVALKRDHEFVNCVQE  
GAGETHQKVSQMYMIASLDRHFSLLYGLLKKHITDNGYKVIIFCTTAMVTRLVADLLGK  
LSLNVREIHSRKPQSYRTRVSDEFKRSKSIILVTSVSDVARGVDYDPVSLVVMGLPSDRE  
QYIHLRGTGRKGEKEGVLVLLAPWEEYFLSSVKDLPIITKSSLPPIDHEAVKKVQKGLIQ  
VEMTNKEAAYQAWLGYYSQKKIARDTTRLVELANEFSSRSMGLSIPPAIPVNILGKMGLK  
NVPGIRVAPGFDKPKAKRNYRSR

>AtRH26

MSSKFPLGVRFITHSLPCTRLASMNAGAL IYSFRSVPVLSKAFPFRLLKY IGLGSRVNFST  
RPERSQPEFARRSGAGGEIRASKSLIEDEAEELSDWVSDLRTSSLRGKFTSDEDNADPEVV  
RRNVDRDTSRGP RRREGQSDRFGGAKRGEKEMDRFGSPNRRRTSGEPADSFNGKRLGD  
REGSRNDRVQKSSSESSFRGRSDRNVDSGSSFRGRSDKNVDSGSSFRGRNDRNVDSGSSF  
RGRSDRNVDSGSSFRGRSDRNVDSGSSFRGRNDRNVDSGSSFRGRNDRNVESGFRREP GS  
ENNRGLGKQTRGLSLEEEEDSDDDENRVGLGNIDDLPSSEDSDEDDENDEPLIKKAASAK  
AVQTDKPTGEHVKTSDSYLSKTRFDQFPLSPLSLKAIKDAGFETMTVVQEATLP I ILQ GK  
DVLAKAKTGTGKTVAFL LPAIEAVIKSPPASRDSRQPP I I VLVVCP TRELASQAAA EANT  
LLKYHPSIGVQVVI GGTKLPTEQRRMQTNPCQILVATPGRLKDHI ENTSGFATRLMGVKV  
LVLEADHLLDMGFRRIER I IAAVPKQRQTFLFSATVPEEV RQICHVALKRDHEF INCV  
QEGSGETHQKVTQMYMIASLDRHFSLLHVL LKEHIADNVYKVI I FCTTAMVTRLVADLL  
SQLSLNVREIHSRKPQSYRTRVSD EFRKSKAI ILVTS DVSARGVDYDPVSLVVMGLPSD  
REQYI HRLGR TGRKGE GEGVLLLAPWEEYFMSSVKDLPI TKSP LPP IDPEAVKRVQKGL  
SQVEMKNKEAAYQAWLGYYSQKMIARDTTRLVELANEF SRSMGLDSPA I PKNVLGKMG  
LKNVPGLRTK

>AtRH27

MANLDMEQHSS ENEE I KKKKHKKRARDEAKK LKQPAMEE EEPDHEDGD AKENNAL IDEEPK  
KKKKKKNKKRGDTDDGEDEAVAE EEPK KKKKKKNK KLQQRGDTNDEEDEV IAE EEPK KKK  
KKQRKDTEAKSEEE EVEDKEE EKKLEETS IMTNKTFESLSLSDNTYKSIKEMGFARMTQI  
QAKAI PPLMMGEDVLGAARTGSGKTLAFLIPAVELLYRVKFTPRNGTGV LVICPTRELAI  
QSYGVAKEL LKYHSQTVGKVIGGEKRKTEAE I LAKGVNLLVATPGRLLDHLENTNGFIFK  
NLKFLVMDEADRILEQNFEE DLK I LNL LKPKRQTSLFSATQSAKVEDLARVSLTSPVYI  
DVDEGRKEVTNEGLEQGYCVVPSAMRLLFLLTFLKRFQ GK KIMVFFSTCKSTKFHAELF  
RYIKFDCL EIRGGIDQNKRTPTFLQFIKAETGILLCTNVAARGLDFPHVDWIVQYDPPDN  
PTDYIHRVGR TARGE GAKGKALLV LTPQELKFIQYLKAAKIPVEEHEFE EKKLLDVKPFV  
ENLI SENYALKESAKEAYKTYI SGYDSSHSMKDVFNHQLNLTEVATSFGFSDPPKVALKI  
DRGGYRSKREPVNKFKRGRGGGRPGGKSKFERY

>AtRH28

MPSSFF FEDASDDELELIRNQEDSSEEDVKEGEAE EHEAGED EDEGEE EYEEEDDDEE EED  
EKRRDADAQSPWDFASYSSSVGEEHARRHTTS IDEKISKAIQHRPVPISINEEEEE EEE  
EEDASDAETDKQEEYLS EDEDAEAYKPEDATPKPFFSTVDGVSFHADTFMELNLSRPLL R  
ACETLGYKKPTPIQAACIPLALTGRDL CASAITGSGKTA AFALPTLERLLFRPKRVFATR  
VLILTPTRELAVQIHSMIQNLAQFTDIKCGLIVGGLSVREQEVVLR SMPDIVVATPGRMI  
DHLRNSMSVDLDDLAVLILDEADRLLQTGFATEITELVRLCPKRRQTMLFSATMT EEVKE  
LVKLSLNKPLRLSADPSARRPPGLTEE VVRIRRTREANQEAVLLSLCTR TFKSKVIIFSG  
TKQAAHRLKILFGLAGLKA AE LHG NLTQAQRLDSLELFRKQEVDFLIATDVAARGLDIIG  
VQTVINYACPREIDSYVHRVGR TARAGREGYAVTFV TSDRSLLKVI AKKVGSKLKS RVI  
PEQSI V KWSQI IDEMEDQYSAVISAERDERALRKAEMEFAKAENMLEHRDEIYARPKRTW  
FMTEKEKKLVAQA EKDSAGNPAGGELVSADRAEDLKMKEKRKREREKNLPRKKRRKLEAA  
REMLEDN EGE EEE EDEEGDEKGRSRGKDKKKQETDKKGLTLKDLGYMRAKAVKAKQRAI  
DSGKMERPKPKDKQSRSKPRNQPRGEEMKDLFKSDMGEKKQGRGGAAAAAKPRTKSKNSF  
KSKARYKRR

>AtRH29

MVEGKGFVSSVTELRKEKQKKKKGSGGFESLNLGPNVFNAIKKKGYKVPTPIQRKTMP  
LILSGVDVAMARTGSGKTA AFLIPMLEK LKQHVPQGGV RALILSPTRDLAEQTLKFTKE  
LGKFTDLRVSLLVGGDSMEDQFEELTKGPDV I IATPGRLMHLLSEVDDMTLRTVEYV VFD  
EADSLFGMGFAEQLHQIL TQLSENQ TLLFSATLPSALAEFAKAGLREPQLVRLDVENKI  
SPDLKLSFLTVRPEEKYSALLYL VREHISSDQQT LIFVSTKHHVEFVNSL FKLENIEPSV  
CYGDMQDARKIHVSRFRARKTMLLIVTDIAARGIDIPLLDNVINWDFPPRPKIFVHRVG  
RAARAGRTGCAYSFVTPEDMPYMLDLHLFLSKPVRPAPTEDEV LKNMEEVMTKTSQAIDS  
GVTVYGRFPQKTIDLIFNRTREMIDSSAELDSLERTSTKAFRLYSKTKPSPSKESIRRAK  
DLPREGLHPIFRSIIETGELEAMSFFQKIKNFRPKQTILEAEGEVAKSKHVKGPAQWVD  
VMKKKRAIHEE IINTRHQQNQKTSNNHLEMEAEPTTSFVDGTVEGSKVSGKKRKAQETFK  
DDEFFISSIPVNHSEAGLSLRGNEGFGSNRLDAAVLDLVADDGQGIKQQSNYHWDKKG  
KKYIKLNNGDRVTASGKIKTESGAKATAKKTGIYKRWQERSHKKVSRDSGDADETTMSG  
RGGRDGKRRQGSVPNAHVRS EIKDL DQVRKERQOKANKVSYLQSKRGGRRGGRGARGGRG  
GGARGRRGGRDFGGGGRDFGSSSDRGGRRSGGRDFGRRGGASTSSRGGKRGGRRGGGK  
RGRGR

>AtRH30

MSSYDRRFADPNYSYRQSRGAPVGSQPMPSAAPYNPRYTGGGGGYGSPVMAGDNSGYN  
RYPSPFQPPSGGFSVGRGGGRGGYGQYGDNRGGGNWGGGGGRGGSSKRELDVSLPKQNF  
NLVHFEKNFYVESPTVQAMTEQDVAMYRTERDISVEGRDVPKPMKMFQDANFPDNI LEAI  
AKLGFTEPTPIQAQGWPMALKGRDLIGIAETGSGKTLAYLLPALVHVSAQPRLGQDDGPI  
VLILAPTRELAVQIQEESRKFLRSGVRSSTCIYGGAPKGPQIRDLRRGVEIVIATPGRLI  
DMLEQCQHTNLKRVTYLVLEADRMLDMGFEPQIRKIVSQIRPDRQTLWSATWPREVETL  
ARQFLRDPYKAIIGSTDLKANQSINQVIEIVPTPEKYNRLTLTKQLMDGSKILIFVETK  
RGCDQVTRQLRMDGWPALAIHGDKTQSERDRVLAEFKSGRSPIMTATDVAARGLDVKDIK  
CVVNYDFPNTLEDYIHRIGRTGRAGAKGMAFTFFTHDNAKFARELVKILQEAGQVVPPTL  
SALVRSSSGSYGGSGGGRNFRPRGGGRGGGFGDKRSRSTSNFVPHGGKRTW

>AtRH31

MPLNFPLRIRFFAHSLSGTHLSYNTSSSVPLLFRIFFSSGLNHFEFGSRINFSTRPNRDQP  
EFERRIRDGGEIRASKSLIEDEEELSNWVSGFRTGSSRGILKSDDEDEEDRSRGRNQEK  
GIRNQVDSFRNKRYGGDRERGFNSRIQGSSEASFRGRKETSFSRDREDEKGLRKREDLR  
LEDESSDEDVKSVMGDIIGDLLSEDEEEDQDYDFLKKKAVSAFGFDKENVIEADKTRNA  
NDSYLTKTRFDHYPLSPLSLKAIKDAGYETMTVVQEATLPIILKGDVLA KAKTGTGKT  
VAFLLPSIEVVVKSPPSPDNKRPPILALVICPTRELANQAATEANTLLKYHPSIGVQVVI  
GGTRLGLEQKRMQTNPCQILVATPGRLKDHIENTPGFATRLKGVKVLVLEADHLLDMGF  
RKDIERIIISAVPKERQTFLLFSATVPEEVQICLVALRRDHEFVNCVHEGTIETHQQVRQM  
HMIASLDRHFSLLYTLLREHIMGNVDYKIVFCTTAMVTKLVADLLGELNLNVREIHSRK  
PQSYRTRVSNFRKSKGLILVTSDVSARGVDYDPDVTLVLQVGLPKDREQYIHRIGRTGRK  
GKEGEGILLAPWEEYFLSSLDLPITKSPLPSIDPETVKKVQKALCHVEMRNKEAAYQA  
WLGYYNSQKMIGRDKDRLVELANEFSSRMGLDNPPAIPKLIILGKMGLKNVPGLRANFIPS  
YI

>AtRH32

MVKIKKTKGMRKQIRLNEVEEINLLKQWIESQKPDSGFNPLSLRPLPKDSKIGKSEDKN  
GTVFSRYAGVRKFAQLPISDKTKRGLKDAKYVDMTDVQSAIIPHALCGRDILGAARTGSG  
KTALFVIPILEKLRHRERWSPEDGVGCIISPTRELAQAQTFGVLNKVGKFKHFSAGLLIGG  
REGVDVEKERVHEMNILVCPAGRLLQHMDETPNFECPLQILILDEADRVLD SAFKGQLD  
PIISQLPKHRQTLFSATQTKKVKDLARLSLRDPEYISVHAEAVTATPTSLMQTVMIVPV  
EKKLDMLWSFIKTHLNSRILVFLSTKKQVKFVHEAFNKL RPIPLKSLHGKMSQEKRMGV  
YSQFIERQSVLFCCTDVLARGLDFDKAVDWWVQVDCPEDVASYIHRVGR TARFYTQKSL  
LLFLTPSEEKMIKLEKQEAQVP IKLIKANNQKLEQVSRLLAALLVKYPDLQGVAFITYL  
RSIHKRRDKEIFDVSKLSIENFSASLGLPMTPRIRFTNLKTKKKGVYESSIAMEIENAQ  
EY EAPLVVKKDLLGEDLEEDFALKPRKEGKVEKSTKEEEVLIPGNRVLKNKLLKINLHR  
PFGSRVLDDEEGNSLAPLASVAEAGTEVALDEERMNDYKVKVGAEMRKADIEDKKV  
DKER RREKRMKQIKRKRGAMEDEEEEEEDHDGSGSSDDETGRNSKRAKIVSDNEENGK  
INTDLSVADLEEMALKFITQ

>AtRH33

MAMAMRLPAISRAVTEVASSPVGLRRLFCASNARFSFLSPPARRQAEPSTNLFHSGLSKR  
ITSERSLWNRIFSRNMGGPRTFFPGLNKWQWKRMEKKAREKENKLLDQEKQLYEARIR  
TEIRAKMWGHPDSGEKTAKLKQSHGPMSPKEHIKTLADR FMKAGADDLWNDNDGPVKKFD  
QGSRSKSDSIDSTPIDVRLVSATCDSMGKHRVLDSSRRGFSMSRFRKRNESSCDEGDDV  
DAKKLDTLSPFSPKFSGTKEKVKSSSTSVVGVIRNKGLFGRRKFRKNDSSTEEDSDEEGNE  
GKMIGWMDLRKTGSSASLGNHDIKLTKRVNRNVTDEELYPLDINRVREDLSKKQSVDNV  
MEEKQEPHDSIYSAKRFDESCISPLTLKALSASGIVKMTRVQDATLSECLDGKDALVKAK  
TGTGKSMAFLLPAIETVLKAMNSGKGVHKVAPIFVLILCPTRELASQIAAEGKALLKNHD  
GIGVQTLIGGTRFRLDQORLESEPCQIL IATPGRLLDHIENKSGLT SRLMALKLFI  
VDEADLLLDLGFKRDEKIIDCLPRQRQSLLFSATIPKEVRRVSQLVLRDHSYIDTIGLGCVE  
THDKVKQSCIVAPHESHFHLVPHLLKEHINMPDYKIVFVCTGMVTSLMYTLTLLREM  
KLN VREIHARKPQLHRTCVSDEFKESNRLILVTSDVSARGMNPDPVTLVIQVGI  
PSDREQYIHRIGRTGREGKGGKGLLLIAPWERYFLDELKDLPLEPIAPDLD  
SRVKHQVDQSMKIDTSIKEAAYHAWLGYNSVRETGRDKTTLAELANRFCHSIGLEKPPAL  
FRRTAVKMGLKGISGIPIRK

>AtRH34

MEGTLDEENLVFETTKGIKPIKSFDDMGMDKVLRGVYDYGKPKPSEIQQRALVPIKGR  
DVIAQAQSGTGKTSMAIASVCQIVNISRKVVQLVLSPSRELASQTEKTIQAI GAHTNIQ  
AHACIGGKSIGEDIKKLERGVHAVSGTPGRVYDMIKRGSLOTKAVKLLVLDSEDEMLSKG  
LKDQIYDVYRALPHDIQVCLISATLPQEILEMTEKFMTDPVRIILVKPDELTLLEGIKQYV  
DVDKEEWKFDTLCDLYGRLTINQAIIFCNTRQKVDWLTEKMRSSNFIVSSMHGDKRQKER  
DDIMNQFRSFKSRVLIASDVWARGIDVQTVSHVINYDIPNNPELYIHRIGRAGRFGREGV  
AINFVKSSDMKDLKDIERHYGTKIREMPADLV

>AtRH35

MESIMEEADSIEYVSVAEERRAIAAQKILQRKKGKASELEEEADKEKLAEAKPSLLVQATQ  
LKRDPVEVSATEQIILQEKEEMMEHLSDKKTLMVRELAKGITYTEPLLTGWKPPLHIRKM  
SSKQRDLIRKQWHIIVNGDDIPPPKFNFKDMKFPRPVLDLTKKEKGIQVQPTPIQVQGLPVI  
LAGRDMIGIAFTGSGKTLVFLPMIMIALQEEMMMP IAAGEGPIGLIVCPSRELARQTYE  
VVEQFVAPLVEAGYPPLRSLLCIGGIDMRSQLEVVKRGVHIVVATPGRLKDMMLAKKMSL  
DACRYLTLDEADRLVDLGFEDDIREVFDHFKSQRQTLF SATMPTKIQIFARSALVKPVT  
VNVGRAGAAANLDVIEVEYVQKQAKIVYLLECLQKTSPPVLI FCENKADVDDIHEYLLLK  
GVEAVAIHGGKDQEDREYAISSFKAGKKDVLVATDVASKGLDFPDIQHVINYDMPAEIEN  
YVHRIGRTGRCGKTGIATTFINKNQSETLLDLKHLLEQAKQRI PPVLAELNDPMEEAET  
IANASGVKGCAYCGGLGHRIRDCPKLEHQKSVAI SNSRKDYFGSGGYRGEI

>AtRH36

MEEPTPEEEGGITIMSKSRKNPKTVVNIQSQKLDSDQNTPOFEKFTNPNPSSDTTSATNF  
EGLGLAEWAVETCKELGMRKPTPVQTHCVPKILAGRDLVGLAQTGSGKTAALFALPILHRL  
AEDPYGVFALVVTPTRELAFQLAEQFKALGSCNLNRCSVIVGGMDMLTQTMSLVS RPHIV  
ITTPGRIVLLENNDVPPVFSRTKFLVLDEADRVLDVGFQDELRTIFQCLPKSRQTLF  
SATMTSNLQALLEHSSNKAYFYEAYEGLKTVDTLTQQFIFEDKDAKELYLVHILSQMEDK  
GIRSAMI FVSTCRQCRLSLMLDELEVENIAMHSLNSQSMRLSALSKFKSGKVPILLATD  
VASRGLDIPVLDLVINYDIPRDPDRDYVHRVGR TARAGRGLAVSII TETDVKLIHKIEEE  
VGKKMEPYNKKVITDSLEVTKVRFVLYIKVLIKY

>AtRH37

MSASWADVADSENTGSGSSNQNSHP SRPAYVPPHLRNRPAASEPVAPLPANDRVGYGGPP  
SGSRWAPGGSGVGVGGGGYRADAGRPGSGSGYGGGGWNNRSGGWDRREREVNPFFEN  
DDSEPEPAFTEQDNTVINFDAYEDIPIETS GDNVPPVNTFAEIDLGEALNINIRCKYV  
KPTPVQRHAIPILLEGRLMACAQ TSGSKTA AFCFPIISGIMKDQHVQRPRGSRTVYPLA  
VILSPTRELASQIHDEAKKFSYQTGVKVVVAYGGTPINQQLRELERGVDILVATPGRLND  
LLERARVSMQIRFLALDEADRMLDMGFEPQIRKIVEQMDMPRGRVQTLF SATFPREI  
QRLAADFLANYIFLAVGRVGSSTDLIVQRVEFVLDSDKRS HLMDLLHAQRENGIQGKQAL  
TLVFVETKRGADSLNWL CINGFPATSIHGDR TQQEREVALKAFKSGRTPILVATDVAAR  
GLDIPHVAHVNF DLPNIDDDYVHRIGRTGRAGKSGLATAFFNDGNTSLARPLAELMQEA  
NQEVPEWLTRYASRSSFGGKNNRSGGRDFRREGSFGSGRGGYGGGGGGYGGGGY  
GGGGYGGGGYGGGGYGGASSGGYGGEP SAWD

>AtRH38

MADTVEKVPTVVESSSSSTVEASNSAEKTEPTTEKKKWDVEDDDDEEEAVSELNSLSIK  
EEEKPDSILEEPEDSNIKAVTSGDTPYTSASRFEDLNLSP ELMKGLYVEMKFEKPSKIQA  
ISLPMIMTPPHKHLIAQAHNGSGKTTCFVLGMLSRVDPTLREPQALCICPTRELANQNME  
VLQKMGKFTGITAE LAVPDSTRGAPAA TRGAPVSAHVVIGTPGTLKKWMAFKRLGLNHLK  
ILVFDEADHMLATDGFRRD SLKIMKDIGRVNPNFQVLLFSATFNETVKDFVARTVKDPNQ  
LFVKREDLALDSVKQYKVVCPKEQNKIEVIK DQIMELGDIQOTIIFVKTKASAQKVHKAL  
AEMGYDVT SVHGNTESDRDKIVKEFKECLTQVLIATDVIARGFDQQRVNLVVNYNLP TK  
YETGEPDYEVYLHRVGRAGRFRGRK GAVFNLLLDGWDKEVMEKIEKYFEANVKEIKSWNS  
EEEYKSALKEAGLLDE

>AtRH39

MVGASRTILSLSLSSSLFTFSKIPHVFPFLRLH KPRFHAFRPLYSA AATTSSPTTETNV  
TDPDQLKHTILLERLRLRHLKESAKPPQQRPS SVVGVVEESSIRKKS KKLVENFQELGLS  
EEVMGALQELNIEVPTEIQCIGIPAVMERKSVVLG SHTGSGKTLAYLLPIVQLMREDEAN  
LGKKT KPRRPRTVVLCPTRELSEQVYRVAKSISHHARFRSILVSGGSRIRPQEDSLNNAI  
DMVVGT PGRILQHIIEEGNMVYGDIA YLVLDEADTMFDRGFGEIRKFLAPLNQRALKTND  
QGFTVLTATMTMAVQKLVDEEFQGIEHLRTSTLHKKIANARHDFIKLSGGEDKLEALL



QVLEPSLAKGSKVMVFCNTLNSRAVDHYLSENQISTVNYHGVEVPAEQRVENLKKFKDEE  
GDCPTLVCTDLAARGLDLVDVHVVMFDFPKNSIDYLHRTGRTARMGAKGKVTSLVSRKDQ  
MLAARIEEAMRNNELESLETTDNVRRDAARTHITQEKGRSVKQIREVSKQRNSRDKPSSS  
SPPARSTGGKTPVRKSSSSSFSKPRKASSPPEKSSKPKRKILKTVGSRSAARGKTGSDR  
RPGKKLSVVGFRGKSSSARAS

>AtRH40

MATTEDTPASAGPRYAPEDPTLPQPKGLIDGSTGILYYWNPETNVTQYERPSPAPPHSA  
TTPKLAQIPVPSSGQGHQAQHEQAKPVGHVSQQHGFQQQPQQFPSQHVPRPQMMQQHPAQQ  
MPQQSGQQFPQQQSQSMVPHPHGHPSVQTYQPTTQQQQQGMQNHQSQMPQQLSHQYASQ  
QHVMGFRPHMQTQGLQNSHQTPQGGPHGQQFPSQQEYNSLAPKREGDEFHGGKKTGF'SQP  
HLPNSERSPSQNTHFANAASQKTANANLAMAQKCNQPANAAVTQFQQPGANLIHQQLGP  
RAPNQMDQTMHLHQKSHVSPFQSNNTYENNLQSRPGNDSYVNMMEVVPVGAQPLHPAAMP  
KDIRISGGPPTNADPAMGQTGHGTYGHAGPAFPNKSLVRPHFVTSPDVPHLSPVEIYRKQ  
HEVTTTTGENIPAPYITFESSGLPPEILREVSFIMNFI SGVGS SHIWCANVFVVFVQLLSA  
GFPSPTPIQAQTWPIALQSRDIVAIAKTGSGKTLGYLIPAFILLRHRNDSRNGPTVLIL  
APTRELATQIQDEALRFRSSRISCTCLYGGAPKGPQLKELEERGADIVVATPGRLNDILE  
MKMIDFQQVSLLVLDEADRMLDMGFEPQIRKIVNEIPRRRQTLMYTATWPKEVRKIASDL  
LVNPVQVNI GRVDELAANKAITQYVEVVPQMEKERRLEQILRSQERGSKVIIFCSTKRLC  
DHLARSVGRHFGAVVIHGDKTQGERDWVLNQFRSGKSCVL IATDVAARGLDIKDIRVVIN  
YDFPTGVEDYVHRIGRTGRAGATGVAFTFFTEQDWKYAPDLIKVLEGANQQVPPQVRDIA  
MRGGGGGGPGYSQDRRGVMNRFDSGGGGTRWDSGGGGFGRGGGGFSGREGGFGRREGGFGG  
REGGFGRGGFRGMRDDSFGRGGNRGRGFTGPDAGHMNVGGGGFGRFGMNNNME SRGFG  
RGSGRGFRGVRGFRDNRRGRSRSRSPDLVRRRRSSSYSRSRSRSGSYSRSRSRSRWSR  
SRSRSPRHSRDRGGHNRSRYSRSPSPVYERRDRAPRVSGFDIKPPVESVVNLDMNAAAA  
IENVVPTLSERQNGVVESEVEAALVRPVVDEEP

>AtRH41

MNEEGCVPHNSDVVKQKSIDQRAPLSGEPKCVICSRYEYICDETNDVCSLECKQALLR  
RVDSARVFPATDECIFYVRDPGSSSHDAQLLRRKLDIHVQGGQSAVPPPVLFTTSCGLPPK  
LLLNLLETAGYDFPTPIQMQAIPAALTGKSLLASADTSGSKTASFLVPIISRCTTYHSEHP  
SDQRRNPLAMVLAPTRELQVQVEDQAKMLGKGLPFKLTALVGGDPMSGQLYRIQQGVELI  
IGTPGRVVDLLSKHTIELDNIMTFVLDEVDCMLQRGFRDQVMQIFQALSQPQVLLFSATI  
SREVEKVGSLAKEIILVSI GNPNKPNKAVNQLAIWVDAKQKQKLFDIILRSQNHFKPPA  
VVYVSSRVGADLLANAITVVTGVKALS IHGEKPKKERRDVMGSFLGGEVPLVSTGVLGR  
GVDLLVVRQVIVFDMPSTIKEYIHVIGRASRMGEKGTAI VFNEDDRNLF PDLVAALKSS  
GAAIPKELINLTSREMHNKKRRVGY

>AtRH42

MEVEKSKYRSEDLDVVEEEDLKKSRDRDRSNERKKDKGSEKRREKDRRKKRVKSSDSE  
DDYDRDDDEEREKREKERERRRRDKDRVKRRSERRKSSDSEDDVEEEDERDKRRVNEKE  
RGHREHERDRGKDRKDREREERKDKEREREKDRERREREREEREKERVKERERREREDG  
ERDRREREKERGSRNRNRRERERSREVGNEESDDDVKRD LKRRRKEGGERKEKEREKSVGRS  
SRHEDSPKRKSVEDNGEKKKTRREELEDEQKKLDEEVEKRRRRVQEWQELKRKKEEAE  
SESKGDADGNEPKAGAWTLEGESDDEEGHPPEEKSETEMDVDEETKPENDGDAKMVDLEN  
ETAATVSESGGDGAVDEEEDIDPLDAFMNTMVLPEVEKFCNGAPPAVNDGTLDSKMNGKE  
SGDRPKKGFNKALGRIIQGEDSDSDYSEPKNDDDP SLDEDEE FMKRVKKTKA EKLSLVD  
HSKIEYEPFRKNFYIEVKDISRMTQEEVNTYRKELELKVHGKDVPRPIKFWHQ TGLTSKI  
LDTMKKLNIEKPMPIQTQALPIIMSGRDCIGVAKTGSKTLGFVLPMLRHIKDQPPVEAG  
DGP IGLVMAPTREL VQQIHSDIRKFSKPLGIRCVPVYGGSGVAQQISELKRGT EIVVCTP  
GRMIDILCTSSGKITNLRVTFVLVMD EADMFMDFMGFEPQITRIIQNIRPERQTVLFSATF  
PRQVETLARKVLNKPVEIQVGGRSVVKNDITQLVEVRPESDRFLRLELLGWESEKGI L  
VVFVQSQEKCDALYRDMIKSSYPCLSLHGKDKQTDRESTISDFKNDVCNLLIATSVAARGL  
DVKELELVNFDAPNHYEDYVHRVGRGTGRAGRKCAVTFI SEDDAKYAPDLVKALELSEQ  
PVPDDLKALADGFMVVKQGI EQAHGTGYGGSGFKFNEEEVEVRKAAKKAQAEYGFEEED  
KSDSEDENDVVRKAGGGEISQQQATFAQIAAIAAAAKAAAAAPVSAPVTANQLLANGGGL  
AAMPGLVPTVPTLPSEGAGRAAMVAAMNLQHNLAQIADAMPEHYEAELEINDFPQNA  
RWKVTHKETLGP ISEWTGAAITTRGQFYPTGRIPGGERKLYLFIEGPSEKSVKHAKAEL  
KRVLEDITNQAMSSLPGGASGRYSVL

>AtRH43

MEVDDGYVEYVPVEERLAQMKRQVVEEPGKGMMEHLSDKKKLMSVGE LARGITYTEPLST  
WKPPLHVRKMSTKQMDLIRKQWHITVNGEDI PPP IKNFMDMKFPSP LLRMLKDKGIMHP  
TPIQVQGLPVVLSGRDMIGIAFTGSGKTLVFLVPMIILALQEEIMMPIAAGEGPIALVIC  
PSRELAKQTYDVVEQFVASLVEDGYPRRLRSLLCIGGVDMRSQLDVVKKGVIHVVATPGRL  
KDILAKKKMSLDACRLTLDEADRLVDLGFEDDIRHVFDFHFKSQRQTLLFSATMPAKIQI  
FATSALVKPVTVNVGRAGAANLDVIEVEYVKQEAIVYLLECLQKTTPPVLIFCENKAD  
VDDIHEYLLLLKGVEAVAIHGKQDEDRDYAISLFKAGKKDVLVATDVASKGLDFPDIQHV  
INYDMPGEIENYVHRIGRTGRCGKTGIATTFINKNQSEITLLDLKHLLQEAQRIPVLA  
ELNGPMEETETIANASGVKGCAYCGGLGHRILQCPKFEHQKSVAISSSRKDHFGSDGYRG  
EV

>AtRH44

MKQSFEGFMKTAMEKKTLDLDFDNLTKPVFLTKAHRKELALKRCQDEIADRDRRSIVQISRS  
NSDNDDGNRPRDVKRERHRSHDHRNRES DREFREREVKARVEKLEMVKREKEINAMKEQ  
YLGTTKPKKRVMKPKSKNFRFDWENTEDTL SGEMNVLYQNPHEAQPLFGRGCRAGIDRRE  
QKKLMTGKHEREKREEDKHWSEKKLEEMNERDWRIFKEDFNISYRGSKIPHPMRNWEET  
IPLGLEQRDVIGISATGSGKTA AFVLPMLAYISRLPPMREENQTEGPYALVMVPTRELAH  
QIEEETVKFSRYLGFKA V SITGWESIEKQALKLSQGCEIVIATPGRLLDCLERRYVVLNQ  
CNYLVLDEADRMIDMDFEPQVSEVLDMVPCSNLKPEKEDEELEEKKIYRTTYMFSATMLL  
SVERLARKFLRNPVVVTIGETTKFITQQVIMTKESDKFSRLKKLIDDLGDDKTAIVFVNT  
RNKVDYIVKNLEKVGRCRVTTLHAGKSQEQRDYSLEEFKKKRFNVLVTTDVLGRGLDILD  
LAQVINYDMPNTMDLYTHRIGRTGRAGKTGVATTFLTLEDKDV F YGLKQKLNENSLVPP  
ELARHEASKFKPGTFPDRFSHF

>AtRH45

MLEKSKSRKENDRDKDRDRSKKENGRDRTTEMRSRVKRC DSEEEERIRIRRDRKSSDFEEE  
EYERDSKRRGEDKGRGRERDRDRGKYLKDREREREKEKGRKKQKKERSREDCNEESD  
DVKCGLKRKRTERS RHGDDDDVEKKTREDEQVEDEQQLAEVEKRRRRRVQEWQELKRQNEE  
AQIESKGPETGKAWTLDGESDDEVKSDSEMDVDRDTKLENGGDAKMVASENETAVTVSEN  
GGDRAADEDEIDPLDAFMNTMVLPEVEKLSNIVIDGILDFKMNGKETGDQAKKGFNKAAL  
GRIIQGEDSDSDYSEPKSDDPSLDEDEEFMKRVKKTAKKLSLVDHSEIEYEPFRKNF  
YIEVKDISRMTQDAVNAYRKELELKVHGKDVPRPIQFWHQTGLTSKILD TLKKNLYEKPM  
PIQAQALPIIMSGRDCIGVAKTGS GKT LGFVLPMLRH IKDQPPVEAGDGP IGLVMAPTRE  
LVQQIYSDIRKFSKALGIICVPVYGGSGVAQQISELKRGT EIVVCTPGRMIDILCTSSGK  
ITNLRRVTYLVMD EADRMDFMDFEPQITRIVQNIRPDRQTVLFSATFP RQVETLARKVLN  
KPVEIQVGGRSVVKNDITQLVEIRPESERFSRLLELLGEWYEKGKEQTDRESAISDFKSD  
VCNLLIATSVAARGLDVKELELVVNF DAPNHYEDYVHRVGR TGRAGRKGCAVTFI SEDDA  
KYAPDLVKALELSEQVPDDVKAVAEGFMAKVKQGIEQAHTGYGGSGFKN EEEDEVK  
AAKKAQAKEYGFEEKSDSEENDVVRKAGGDISQQQITLAQIAA IASAASKAPVTANQL  
LPNGGGLATEPGIPPTDGAGRVAAMIAAANVQQYLAKIQADAIPEHYEAELEINDFPQNA  
RWKVTHKETLGP ISEWSGASITTRGKFYEAGRIPGPEERKLYL FVEGPTEISVKTAKAEL  
KRVLEDITNQTFSLPGGAQSGRYSVL

>AtrH46 (was wrong in Qi file)

MAATASAIRYAPEDPNLPKPWKGLVDSRTGYLYFWNPETNVTQYERPASSAPPKLA AIPV  
SSSVQTNQQSSSGFN SGKEDDKYGRGSDGPKSDSGSRFNEAGRTGPISSNDAASGLGNAS  
SGGSSARGPPSSAAGNELSPEAYCRKHEITVSGGQVPPPLMSFEATGLPNELLRECPNFM  
PYALS FVPGAIFALGGANVVRCATSLGFLQI IWSALFGGPNFLRCPPAAGFNSYLVLPAN  
GRMVYSAGFSAPSPIQAQSWPIAMQNRDIVAIAKTGSGKTLGYLIPGFMHLQR IHNDSRM  
GPTILVLSPTRELATQIQVEALKFGKSSKISACLYGGAPKGPQLKEIERGVDIVVATPG  
RLNDILEMKRISLHQVSYLVLDEADRMLDMGFEPQIRKIVNEVP TKRQTLMYTATWPKEV  
RKIAADLLVNPAQVNI GNVDLVANKSITQTIEVLAPMEKHSRLEQILRSQEPGSKIIIF  
CSTKRMCDQLARNLTRTFGAAA IHGDKSQAERDDVLNQFRSGRTPVLVATDVAARGLDVK  
DIRVVVNYDFPNGVEDYVHRIGRTGRAGATGLAYTFFGDQDAKHASDLIKILEGANQKVP  
PQVREMATRGGGGMKNFRRWGTPSSGGGGGRGGYGD SGYGGRGESGYGSRGDSGYGGRGD  
SGGRGSWAPSRDSGSSGWGRERSRSPERFRGGPPSTSSPPRSFHEAMMMKNR

>AtRH47

MAASTSTRFLVLLKDFS AFRKISWTCAATNFHRQSRFLCHVAKEDGSLTLASLDLGNKPR  
KFGKGKAMKLEGSFVTEMGQKVRVAVKNDKMKVVKKEKPAEIVSPLFSAKSFEEELGLPDS

LLDSLEREGFSVPTDVQSAAVPAI IKGHDAVIQSYTGSKTLAYLLPILSEIGPLAEKSR  
SSHSENDKRTEIQAMIVAPSRELGMQIVREVEKLLGPHRRMVQQLVGGANRMRQEEALK  
KNKPAIVVGTGPGRIAEISKGGKLLHTHGCRFLVLDDEVDELLSFNFREDIHRILEHVGRKRS  
AGPKGEVDERANRQTILVSATVPFVSVIRAASWSHEPVLVQANKVTPLDTPVQPSAPVMSL  
TPTTSEADGQIQTTIQSLPPALKHYICISKHQHKVDTLRRCVHALDAQSVIAFMNHSRQL  
KDVVYKLEARGMNSAEMHGDLGKLGKLRSTVLKFKNGEIKVLVTNELSARGLDVAECDLVV  
NLELPTDAVHYAHRAGRTGRLGRKGTVVTVCEESQVFIKVKMEKQLGLPFLYCEFDVDEL  
VVTEEDKAIIR

>AtRH48

MGGGPRTFPGGLNKWQWRMHEKKAREKENKLLDQEKQLYEARIRTEIRAKMWGNPDSGE  
KTAKSKQSHGPMSPKEHIKTLADRFRMKAAGAEDFWNENDGPVKKSDQGSRSRSDSIDSTSN  
SPIDVRRLLVSATCDSMGKNRVFGSSRRGFSSMSRFRKNESSCDEGDDFDAKKLDTLSPFS  
PKFAGTKEKVKSSRSVVGIVIRNKGLFGRKFRKNDSSSTEEDSDEEGDEGKMIGWMDMRKT  
GSSASLGNHDIKLTKRVRNRVTDEELYPLDINTVREDLSKRKSVDNVMEEKQEPHDSIY  
SAKRFDESCISPLTLKALSASGILKMTRVQDATLSECLDGKDALVKAKTGTGKSMAFLLP  
AIETVLKAMNSGKGVNKVAPIFALILCPTRELASQIAAEGKALLKFHDGIGVQTLIGGTR  
FKLDQQRLESEPCQILIATPGRLLDHIENKSGLTSRMLALKLFIIVDEADLLLDLGFRRDV  
EKIIDCLPRQRQSLLSATIPKEVRRVSQLVLRKRDHSYIDTIGLGCVETHDKVRQSCIVA  
PHESHFHLVPHLLKEHINNTPDYKIVFCSTGMVTSIMYTLLEMKLNVRREIHARKPQLH  
RTRVSDEFKESNRLILVTSVDSARGMNPVDTLVIQVGIQSDREQYIHRLGRTGREGKGG  
EGLLLIAPWERYFLDELKDLPLEPIAPDLDIVKHQVDQSMKIDTSIKEAAYHAWLGY  
YNSVRETGRDKTTLAELANRFCHSIGLEKPPALFRRTAVKMGKLGISGIPIRK

>AtRH49

MDSSPPKTIKALPRFSELKPPLSEDIIEALDRSGFEVCTPVQAETIPFLCCHKDVVVDA  
ATGSGKTLAFLLPFIEIIRRSNSYPPKPHQVMGVIISPTRELSAQIHKVAEPFVSTLPNV  
NSVLLVGGREVEADMNTLEEEGANLLIGTPGRLSDMMKRMEFLDFRNLEILILDEADRLL  
DMGFQKQVNYIISRLPKQRRTGFSATQTQAVADLAKAGLRNAMEVISGAESKSKTSSGL  
YCEYLKCEADQKSSQLVHLLIENKNKLVVFFMTACVDYWGLVLSKIPTLKSISFFSTH  
GKMDQKGRDTALASFTTEASSGVLLCTDVAARGLDIPGIDYVVQYDPPQDPDVF IHRVGR  
ARMERQGRAIVFLMPKETDYVEFMRIRRVPLQERKCSENASDVIP IIRSLAIKDRAVLEK  
GLQAFVSFVRAYKEHHCYSIFSWKGLEIGKLAMGYGILSFPYISEVKQDRIGIVGFTPVQ  
GITFEDIKYKNKSREKQRQONLLARKDKLQOEKRGKRKKSKEAVDDSNKASRKRKLTGR  
QRQTIQTAQDEEEMNLRL

>AtRH50

MLARAPPYPFNFPARNNTICNRNEIVRLFRNGGGVVARAGGFTRRPLETSSSYDDSTDDG  
FVIIISAADKENEFAPPPSSDLLSSIPESARRNGSRSRGLTASFGRKKAQKVKALVGKVT  
QKKQHMSHNEEDEDASDENYSADEGFGSSSILDLMRKKLAMKAIPRSGKSAERNEVKR  
ASKVRESRESRRDLDRLEGGDEEDVDEVSNDPDRFTDNQRAGSRSSYSKGGYAANSRKGDR  
LSVARDLDSFEGHGRAIDEVSNPRKFNDRNERAESRSSYSRDSSANSRGRREDRRFVAKELD  
TFQGRDKAYDEVYNPRRFTDNERGLRGGSHSKGSDTNSRGWGDRRSVVYTRDMDWRERN  
KTKDTRTETGFFSRKTFAEIGCSEDMMKALKEQNFDRPAHIQAMAFSPVIDGKSCIIADQS  
GSGKTLAYLVPVIQRLREELQGHKSSPGCPRVIVLVPTAELASQVLANCRSISKSGVP  
FRSMVVTGGFRQRTQLENLEQGVVLIATPGRFTYLMNEGILGLSNLRCAILDEVDILFG  
DDEFEAALQNLINSSPVTAQYLFVTATLPLEIYNKLVVEFPDCEVVMGPRVHRVSNAL  
FLVDCSGDDNAEKTPEAFQNKKTALLQIMEENPVSKTIIFCNKIETCRKVENIFKRVD  
KERQLHVLFPFAALSQESRLTNMQEFTSSQPEENSLFLVCTDRASRGIDFSGVDHVFLFD  
FPRDPSEYVRRVGRRTARGARGKGFIFVVGKQVGLARRIERNEKGHPVHDVFNAYEFT  
T

>AtRH51

MVESDKSSVEELKRVKRSRGGKNEQQKAEKTHTVEENADETQKKSEKKVKKVRGKIE  
EEEEKVEAMEDGEDEKNIVIVGKIGIMTNVTFDSLSDLSEQTSIAIKEMGFQYMTQIQAGSI  
QPLLEGKDVLLGAARTGSGKTLAFLIPAVELLFKERFSPRNGTGVIVICPTRELAIQTKNV  
AEELLKHSQTVSMVIGGNNRSEARQRIASGSNLVIATPGRLLDHLQNTKAFIYKHLKCL  
VIDEADRILEENFEEDMNKILKILPKTRQTALFSATQTSKVKDLARVSLTSPVHVDVDDG  
RRKVTNEGLEQGYCVVPSKQRLILLISFLKKNLNKKIMVFFSTCKSVQFHTEIMKISD  
VSDIHGGMDQNRRTKTFDFMKAKKGIILLCTDVAARGLDIPSVDWIIQYDPPDKPTEYI  
RVGRTARGEGAKGALLVLIPEELQFIRYLKAAKVPVKELEFNEKRLSNVQSALEKCVAK

DYNLNKLA KDAYRAYL SAYNSHSLKDI FNVHRLDLLAVAESFCFSSPPKVNLNIE SGAGK  
VRKARKQQGRNGFSPYSPYGGKSTPTKEA

>AtRH52

MSSNSWADVSESERAPSGGGWGYSRPSRTNYVPPHLRSRTPSSEFVAPSPGMNDRGGYGG  
ANSGYGGRRQGYGGRRSGYGGRRGPPVGGWNRSSGGWDRRDETETNPFNGDGNADPAVNEQE  
NTVINFEAYEDIPIETSGDNVPPPVNTFAEIDLGEALNLNIQRCKYVKPTPVQRNAIPIL  
AAGRDLMACAQTGSGKTA AFCFPIISGIMKQDHIERPRGVRGVYPLAVILSPTRELACQI  
HDEARKFSYQTGVKVVVAYGGTPVNQQIRELERGVDILVATPGRLNDLLERGRVSLQMVR  
FLALDEADRMLDMGFEPQIRKIVQQMDMPPPGVRQTM LFSATFPREIQR LASDFLSNYIF  
LAVGRVGSSTDLIVQRVEFVHSDKRSHLMDLLHAQRENGNQKQALTLV FVETKKGADS  
LENWLCINGFPATTIHGDRSQQEREVALRSFKTGRTPILVATDVAARGLDIPHVAHVNF  
DLPNDIDDYVHRIGRTGRAGNSGLATAFFNDNNTTMAKPLAELMQEANQEVDPDLTRYAS  
RASFGGKNNRRSGGRFRGGRDFRRESFSRGGGGADYGGGGYGGVPGGGYGAMPGGYGPV  
PGGGYGNVPGGGYAPYGRGGGAYYGPGGYGTVPNQGYGPGVASAWD

>AtRH53

MITTVLRRSLLDASKRNL SASLTSINTVLFHNLAPAATRVSDLALIGSSDVKAGFPFGVE  
AKGIHFQSGPLDFRASMVSQAGFAISESSERRVGDSESVGGDGLAISSELGISPEIVKALS  
SKGIEKLFPIQKAVLEPAMEGRDMIGRARTGTGKTLAFGIPIDKIIKYNKHXGRGRNPL  
CLVLAPTRELARQVEKEFRESAPSLDTICLYGGTPIGQQMRQLDYGVDAVGTTPGRVIDL  
MKRGALNLSEVQFVVLDEADQMLQVGF AEDVEIILEKLEPEKRQSMMSATMPSWIRSLTK  
KYLNNPLTVDLVGDSDQKLAGITTYSI IADSYGRASIGPLVTEHAKGGKCI VFTQTKR  
DADRLSYALARSFKCEALHGDISQSQRERTLAGFRDGHFNILVATDVAARGLDVPNVLDI  
IHYELPNNTETFVHRTGRTRAGKKGSAI IYSQDQSRVKI IEREVGSRFTELPSIAVE  
RGSASMFEGIGSRSGGSFGGMRDRGSSFGGRSGGGYGGSSGGYGGGRSGGSSNRYSGD  
SDRSFGFSFGMRSPREGYSDRSSQSGGRSSFGGRSGGSSNRRSSGFDFGSDRSSQSGG  
RSSFGGFGSNDGKRSY

>AtRH56

MGDARDNEAYEEELLDYEEDEKVPDSGNKVNNGEAVKKGYVGIHSSGFRDFLLKPELLRA  
IVDSGF EHPSEVQHECIPQAILGMDVICQAKSGMGKTAVFVLSTLQQIEPSPGQVSALVL  
CHTRELAYQICNEFVRFSTYLPDTKVSVFYGGVNIKIHKDLLKNECPHIVVGTTPGRVLAL  
AREKDL SLKNVRHFILDECDKMLESLDMRRDVQEIFKMTPHDKQVMMSATLSKEIRPVC  
KKFMQDPM EIVYDDEAKLTLHGLVQHYIKLSEMEKNRKLNDLLDALDFNQVVI FVKSVSR  
AAELNKL LVECNFP SICIHSGMSQEERLTRYKSFKEGHKRILVATDLVGRGIDIERVNI V  
INYDMPDSADTYLHRVGRAGRFGTKGLAITFVASASDSEVLNQVQERFEVDIKELPEQID  
TSTYMPS

>AtRH57

MEKSSYFLFGGTNFNKFKFAPDFAKFKNSTEDDDSNKKVNFVVEEEDTEQPEAEKVIVS  
SKKRKRSSNSVPEGFDFVKSSKKARAKGKAEQITKNEIVENPKKELNRQMERDALSR  
KQYSIHVSGNNIPPLKSF AELSSRYGCEGYILRNLAELGFKEPTPIQRQAIPILLSGRE  
CFACAPTGSKGTFAFICPMLIKLRPSTDGIRAVILSPARELAAQTAREGKKLIKGSNFH  
IRLMTKPLVKTADF SKLWCDVLI STPMRLKRAIKAKKIDL SKVEYLVLDES DKLFEQSL  
KQIDCVVKACSNPSIIRSLFSATLPDSVEELARSIMHDAVRVIIGRKN TASET VKQKLVF  
AGSEEGKLLALRQSFAESLNPPVLIFVQSKERAKELYDELK CENIRAGVIHSDLPPGERE  
NAVDQFRAGEKWVLIATDVIARGMDFKGINCVINYDFPDSASAYIHRIGRSGRAGRSGEA  
ITFYTEQDVPFLRN IANTMMSSGCEVPSWIMSLK KKKWRKHRPRRDSISTKPKADKNDT  
E

>AtRH58

MASQLLNVPHLA FFPKISYASVFSTLKP SFFHSTSTRALKSSPSSRIINLQAVAETSSE  
IESNSVTETTVP LTLRQICQGFVPEHILHRMEEIGFVFP TDIQREALPTLFTGRDCILHA  
QTGSGKTLTYLLIFSLINPQRSSVQAVIVVPTRELGMQVTKVARMLAAKSEIDVKGCTV  
MALLDGGTLRRHKSWLKAEPAILVATVASLCHMLEKHIFRIDSVRVLV VDEVDFLFYSS  
KQVGSVRKLLTSFSSCDKRQTVFASASIPQH KHVFHDCIQKWKTRDVVHVHVSAIMPMP  
LCLLHRFVMCEKTNKHQVLLALLESDAPESAIIFVGEQSEKSKKAGNDPSTLLMEFLKT  
SYKGSLEILLLEGDMFNFSRAASL TEIRQGGGFLLVST DIAARGIDL PETTHIFNFDLPQ  
TVT DYLHRAGRAGRKPFSDRKCIVANLITSEERFVLQRYENELMFSCEEMML

>EcoSrmB

MTVTTTFSELELDESLLLEALQDKGFTRPTAIQAAAIPPALDGRDVLGSAPTGTGKTAAYLLPALQHLLDFP  
RKKSGPPRILILTPTRELAMQVSDHARELAKHTHLDIATITGGVAYMNHAEVFSENQDIVVATTGRLLQY  
IKEENFDCRAVETLILDEADRMLDMGFAQDIEHIAGETRWRKQTLFLLFSATLEGDAIQDFAERLLEDPEV  
SANPSTRERKKIHQWYYRADDLEHKTALLVHLLKQPEATRSIVFVRKRERVHELANWLREAGINNCYLEG  
EMVQGKRNEAIKRLTEGRVNVLVATDVAARGIDI PDVSHVFNFDMPRSGDTYLHRIGRTARAGRKGTAIS  
LVEAHDHLLLKGKVGRIIEEPIKARVIDELRPKTRAPSEKQTGKPSKKVLAKRAEKKKAKEKEKPRVKKRH  
RDTKNIGKRRKPSGTGVPPQTTEE

>EcoDbpA

MTAFSTLNLVPPAQLTNLNLGYLTMTPVQAAALPAILAGKDVRVQAKTGSQKTAAFGLGLLQQIDASLF  
QTQALVLCPTRELADQVAGELRRLARFLPNTKILTLGCGQPFQGMQRDSLQHAPHIIVATPGRLLDHLQKQ  
TVSLDALNTLVMDEADRMLDMGFSDAIDDVIRFAPASRQTLFLLFSATWPEAIAAISGRVQRDPLAIEIDST  
DALPPIEQQFYETSSKGIPLLRLLSLHQSSCVVFCNTKKDCQAVCDALNEVQGSALSLHGDLEQRDR  
DQTLVRFANGSARVLVATDVAARGLDIKSLELVNFEALWDPEVHVHRIGRTARAGNSGLAISFCAPPEEA  
QRANIISDMLQIKLNWQTPPANSSIATLEAEMATL CIDGGKAKMRPGDVLGALTGDI GLDGADIGK IAV  
HPAHVYVAVRQAVAHKAWKQLQGGKIKGKTCRVRLK

>EcoRH1B

MSKTHLTEQKFSDFALHPKVVEALEKKGFHNCTPIQALALPLTLAGRDVAGQAQTGTGKTMAFLTSTFHY  
LLSHPAIADRKVNQPRALIMAPTRELAVQIHADAEPLEAATGLKLGAYGGDGYDKQLKVLESGVDILIG  
TTGRLIDYAKQNHINLGAIQVVVLDEADRMVDLGFIKDIRWLFRRMPPANQRLNMLFSATLSYRVRELAF  
EQMNAEYIEVEPEQKTGHRIKEELFYPSNEEKMRLLQTLIEEWPDRAIIFANTKHRCEEIWGHLAADG  
HRVGLLTGDVAQKKRLRILDEFTRGDLIDLVATDVAARGLHIPAVTHVFNVDLPDDCEDYVHRIGRTGRA  
GASGHSISLACEEYALNLP AIETYIGHSIPVSKYNPDALMTDLPKPLRLTRPRTGNGPRRTGAPRNRRS  
G

>EcoDEAD

MAEFETTFFADLGLKAPILEALNDLGYEKPSPIQAEICIPHLLNGRDVLGMAQTGSQKTAAFSLPLLQNLDP  
ELKAPQILVLAPTRELAVQVAEAMTDFSKHMRGVNVVALYGGQRYDVQLRALRQGPQIVVGTGPRLLDHL  
KRGTLDSLKLSGLVLDEADEMLRMGFIEDVETIMAQIPEGHQALFSATMPEAIRRITRRFMKEPQEVRI  
QSSVTTRPDISQSYWTVWGMKNEALVRFLEAEDFDAAIFVVRTKNATLEVAEALERNNGYNSAALNGDMN  
QALREQTLERLKDGRLDIL IATDVAARGLDVERISLVVNYDIPMDSESYVHRIGRTGRAGRAGRALLFVE  
NRERLLRN IERTMKT IPEVELPNAELLGKRRLEKFAAKVQQQLESDDLQYRALLSKIQPTAEGEELD  
LETLAAALLKMAQGERTLIVPPDAPMRPKREFRDRDRDRDRDRDRDRDRDRDRDRDRDRDRDRDRDRDR  
IEVGRDDGVEVRHIVGAIANEGDISSRYIGNIKLFASHSTIELPKGMPGEVLQHFTRTRILNKPMNMQLL  
GDAQPHTGGERRGGGRGFGERREGGRNFSGERREGGRGDGRRFSGERREGRAPRRDDSTGRRRFGGDA

>EcoRh1E

MSFDSLGLSPDILRAVAEQGYREPTPIQQQAIPAVLEGRDLMASAQTGTGKTAGFTLPLLQHLITRQPHA  
KGRRPVVALILTPTRELAAQIGENVRDYSKYLNIRSLVVFFGGVSNPQMMKLRGGVDVLVATPGRLLDLE  
HQNAVKLDQVEILVLDEADRMLDMGF IHD IRRVLTKLPAKRQNLFSATFSDDIKALAEKLLHNP LIEV  
ARRNTASDQVTQHVFVVDKRRKRELLSHMIGKGNWQVLFVTRTKHGANHLAEQLNKDGI RSAAIHGNKS  
QGARTALADFKSGDIRVLVATDIAARGLDIEELPHVVNYELPNVPEDYVHRIGRTGRAAATGEALSLVC  
VDEHKLLRDI EKLLKKEIPRIAI PGYEPDPSIKAEP IQNGRQQRGGGRGQGGGRGQQPRRTESGAKSGN  
VKPAEKPSRRLGDAKPAGEQQRRRRPRKPAAAQ

>Os01g07080

MSSSSSSSLAAAAARKRALTEQRFSELSPALSPPEVVKALKGGGFRRCTPVQAAAIPLLLLSH  
KDVAVDAATGSGKTLAFVVPVVEILRRRPSPPKPHEVLGIIISPTRELSSQIYNVAQPPF  
ATLKGVSMLLVGGFDIKAELEKLEEEGANILVGTGPKLFDVMERLDTLNYKNLEILILD  
EADRLDLGLGFQKQITSIISKLPKLRRTGLFSATQTEAVKELAKAGLRNPVREVKTEVKP  
TGKDGAAQQLGPKTPLGLRLEMYICEASNKSSQLVDFLVQNNGKKIMVYFATCACVDYV  
AIVLPLLDLKGSPPIIPYHGKMKQGPREKALASFSALSSGILVCTDVAARGLDIPHVLI  
VQYDPPQDPNVFIHRAGRTRARYDQEGDAIVFLLPKEDTYVEFLKRRGVPLTERECSTNAV  
DIVPQIRSAALEDRNVMEKGLTAFVSVFRAYKEHHCSYIFSWKDLIEIGRLGMEYGLLQIP  
SMPEVKHHSLSLEGFTPVKDVVTKIKYKDKAREKQRQKTLKRKAEEELALRPEIEKRRKA  
PEKPEKPKRKKTKGQRQAVQTKEDMDELANEYRLLKLLKRGVIDEDEYEKLTGFGESEDD  
DSSDGGSDLDLDERKERGNKVLKIKQKGAAGSRRFEGRSKQKTRRR

>Os01g07740

MASAAAAAATARGPRYAPPDPTLPKPWRGLIDGNTGYLYFVWNPETKAVQYDRPTAPPPSS  
PPAQQPPERPRNSDPAESQAQAGASRTQNAAPADDRARNDHLNDHFERRTEAAGSHAQNV  
PFTEQNTSRNPSSQPCSAAGVYPAQNVFSEAASGDRTSPEAYRAKHEITIVGNEAPAPFM  
TFQSTGFPPPEILREVSANHLHDYLMHFLVSFSKEIRRSLCVHTTYVITTLDVHLSRFLKS  
TIYVKVQAGFSAPTPIQAQSWPIALRNRDIVAVAKTGSGLTGLYIPGFIILLKRLQHNS  
RDGPTVLVLSPTRELATQIQDEAKKFGSSRISVCLYGGAPKGPQLRDLERGADIVVAT  
PGRNLIDILEMRRVSLHQVSYLVLDEADRMLDMGFEPQIRKIVKQVQPKRQTLMTATWPK  
EVRKIASDLSNPVQVNIQNTDQLVANKSITQYVDVITPPEKSRRLDQILRSQEPGSKII  
IFCSTKRMCDQLARNLARQYGASAIHGDKSQAERDVLSEFRSGRCPILVATDVAARGLD  
IKDIRVVVNYDFPTGVEDYVHRIGRTGRAGATGVAYTFFCDQDSKYASDLVKILEGANQS  
VSQQLRDMVSRGGYGRSRRWASSDSSYGGRGYDSGYTSRSTDNYNNGYGSQSGNGSSFH  
SSFHNSNSGNQFGDTSFGQTSFHNSSSNNQTSNPSFHASSNNDQPGDGLSFHARFYSSS  
RGSQSRSTNNAGFRDRSRSPPSNRNHEDPGSKAVGVSNW

>Os01g08930

MAMAGAAGRCLMLTRPSPLLRLLRAALATTTTTTTAAGASAVTAPTEPETTAREAPSR  
HELLLERLRQRHLKGVPAATPRPAQREKGRGGGGGAQELQQKRRVEVVDSEELGLGEE  
VMAALGEMGISKPTIEICVGVPAVLGTSVVLGSHTGSGKTLAYLLPLVQLLRRDEAMLG  
MSMKPRRPRAVVLCPTRELTEQVFRVAKSISHHARFRSTMVSGGSRIRPQEDSLNMPVDM  
VVGTPGRILDHIKDGMMVYGDIKYLVLDEADTMFDQGFDPDIRKFLAPLKNRAAKPGDQG  
FQTVLVATMTKAVQKLIDEEFEGIVHLRTTTTFQKRVATARHDFIKLSGSENKLEALLQV  
LEPSLAKGNKVMVFCNTLNSRAVDHFLTENQISTVNYHGEVPAEERVENLNKFRNEEGD  
CPTLVCTDLAARGLDLVDVHVMFDFPSNSIDYLHRTGRTARMGAKGKVTSLVAKKDVTL  
ATRIEEAMKKNESLEALTTNNVRRAAVNPQYTSTKGRPSALKVVNQKRRGVALQTKSSR  
IVKDTTSSRRRSPIRSQPRSKSTSSGKAKPVRSKPSKSSSPKVAKSRPRPEGRKGD  
LNKLGSKLSVVGFRGRSSGKSAQAS

>Os01g10050

MSRFDGRAADPGSYRDRRSEGAFFGGGTRAFAPTSKADSAAAAADLDGLPRFEKNFYVES  
SVAGMTEEEVEAYRRRREITVEGRDVPKPVREFRDVGFPEYVLQKITKAGFVEPTPIQSQ  
GWPALRGRDLIGIAETGSGKTLAYLLPAIVHVNAQPI LAPGDGPIVLVLAAPTRELAVQI  
QQEATKFGASSKIKSTCIYGGVPKGPQVRDLQKGVIEVIATPGRLIDMIESHHTNLRRVT  
YLVLDEADRMLDMGFEPQIKKIVSQIRPDRQTLYWSATWPKEVEQLARNFLFDYKVIIG  
SEELKANHAISQHVEILSESQKYNKLVNLEDIMDGSRIILIFMDTKKGCQITRQLRMDG  
WPALSIHGDKSQAERDWSLSEFKSGKSPIMTATDVAARGLDVKDVKYVINYDFPGSLEDY  
VHRIGRTGRAGAKGTAYTFFTAANARFAKDLINILEEAGQKVSPELANMGRGAPPPSSGH  
RDRYRGYGGGRSWS

>Os01g36890

MAEAEVKDNEVYEEEDLVYEEEEVENGTGDDGANAANASADVVKKGYVGIHSSGFRDFLLKP  
ELLRAIQDCGFHEPSEVQHECIPQAILGMDVICQAKSGMGKTAVFVLSLQIQIDPVAGQV  
GALVLCHTRELAYQICHEFERFSKYLPEVKVAVFYGGVHIKKHKDLLKNDCPHIVVGTGP  
RILALAREKDLSLKNVRHFILDECDKMLDLSLDMRRDQVEIFKMTPHDKQVMMFSATLSKE  
IRPVCKKFMQDPMEIYVDDEAKLTLHGLVQHYIKLSEAEKNRKLNDLLDALDFNQVIVFV  
KSVSRAAELNKLCECNFPAISIHSGMTQEERLTRYKNFKEGHKRLVATDLVGRGIDIE  
RVNIVINYDMPDSADSYLHRVGRAGRFGTKGLAITFVSSASDSVDLNVQVQERFEVDIKEL  
PEQIDTSTYMPS

>Os01g36920

MGEAEVKDNEVYEEEDLVYEEEEVENGADGGAAAANASADVVKKGYVGIHSSGFRDFLLKP  
ELLRAIQDCGFEHPSEVQHECIPQAAILGMDVICQAKSGMGKTAVFVLSLQQIDPVAGQV  
GALVLCHTRELAYQICHEFERFSKYLPEVKVAVFYGGVHIKKHKDLLKNDCPHIVVGT  
RILALAREKDLSLKNVRHFILDECDKMLDSDLMRRDVQEIFKMTPHDKQVMMFSATLSKE  
IRPVCKKFMQDPMEIYVDDEAKLTLHGLVQHYIKLSEAEKNRKLNDLLDALDFNQVVFV  
KSVSRAAELNKLCECNFPAISIHSGMTQEERLTRYKNFKEGHRILVATDLVGRGIDIE  
RVNIVINYDMPDSADSYLHRVGRAGRFGTKGLAITFVSSASDSDVLNQVQERFEVDIKEL  
PEQIDTSTYMPS

>Os01g43120

MAAGDLLLRTQSGPLVRLARAFPSCLCLRVPARRRRGAPPLTAAKVDVADAVGRRVRS  
AVPKRRRSRRDAEEEEEEGLAFSRVVTGRGRGVREEGVAEAGEAPEFDAKSGDESGGVDG  
SYLSDTRFDQCTISPLSLKAVKDAGYERMTQVQEATLPVILQKDVLA  
KAKTGTGKTVAFLPAIEVLSALPNSRRDQLRPSINLLVMCPTRELAIQVAVEAKKLLKYH  
RSLGVQVVI  
GGTRLTQEQRSMQANPCQILVATPGRCLKDHVENTPGFSTRCLKGVKVLVLEADRL  
LLDMGFRRDIERIIASVPKERQTLLFSATVPEEVQISHIAMKKNYKFINTVKDGEETHA  
QVSQMFMIAPLDLHFSILYDVLKKHVAEDADYKVIIFCTTAMVTKLVAEILSQLRLNIRE  
IHSRKSQSARTKVSDEFKRSRGLILVSSDVSARGVDYDPVTLVIQVGVPADRQQYI  
HRLGRTGRKGEQGLLLLAPWEKYFLSSIKDLSISEATVPSVDSSTQITVKDAVRK  
VEMRSKECAYQAWLGYNSNKTIGREKSRLVKLAEFEFSQSMELSVPPAIPKQILRKM  
GLNNVPLRST

>Os01g45190

MAAATTSRRGPGAMDDENLTFETSPGVEVISSFDQMGIRDDLLRGIYAYGF  
EKPSAIQQR  
AVLPIISGRDVIAAQASGTGKTSMISLVCQIVDTAVREVQALILSPTRELAAQ  
TERVMLAIGDFINIQVHACIGKSIGEDIRKLEHGVHVVS  
GTPGRVCDMIKRRTLRTRAIKLLILD  
EADEMLGRGFKDQIYDVYRYLPELQVCLISATLPHEILEMTSKFMTDPVRI  
LVKRDELTL  
LEGIKQFFVAVEKEEWFDTLCDLYDTLTITQAVIFCNTKRKVDWLT  
TERMRSNNFTVSAMHGDMPQKERDAIMGEFRSGATRVLITTDVWARGLDVQ  
QVSLVINYDL  
PNNRELYIHRIGRSGRFG  
RKGVAINFVKKEDIRILRDIEQYYSTQIDEMPMNVADLI

>Os01g68320

MRTSRVASPPSPKDHDTWAIATDLARPHLTRILTHQNQTTGLLTPPHAAFL  
PDPNLPRR  
LFPSSSSTPTAAAPPDSGEP  
SRARARTETYRTGDMNPYDLRYADPSSYRDRRSDLAGAP  
VLAASAPAAANPYAAAYAPAPAAPVAPAGGDFSRFGGRG  
RGGGAGGGGWGRGGGGGAG  
GYRGGGGRGGGRDALDSL  
SLPKPDFRSLIPFEKNFYVECPAVQAMSDMDVSQYRRQ  
RDITVEGH  
DVPKPVRYFQEANFPDYCMQAI  
AKSGFVEPTPIQSQGWPMALKGRDMIGIAQTGSG  
KTL  
SYLLPGLVHVGAPRLEQGDGPIV  
LILAPTRELAVQIQQESGKFGS  
YSRTRSTCIYGGAPKGPQIRDL  
RRGVEIVIATPGRLLIDMLEGGHT  
NLRRVTYLVLEADRMLDMGFEPQIR  
KIVAQIRPDRQTL  
YWSATWPREVESLARQFLQNPYKVI  
IGSPDLKANHSIQQIEVISEH  
EKYPRLSKLLSDLMGSRILIFFQTKKDC  
DKVTRQLRMDGWPALSIHGDKAQA  
ERDYVLA  
EFKSGKSP  
IMAATDVAARGLDVKDIKCVIN  
FDFPTTLEDYIHRIGRTGRAGASG  
TAF  
TFFTL  
SNAKFSRNLVKILREAGQV  
VNPAL  
ESMAKSASSMGGGNFRSRGRGGF  
GNRSGSNSIP  
IRGRRPY

>Os01g73900

MAAFSGCASPLSTTLRSLGAPFTLRHRLRLRRLRASAATLREVCAGRVPEH  
VLQRAEEVG  
YVVPTEVQEQSLPVLLSGQDCILHAQTGSGKTLAYLLSVFSAIDFGRSSV  
QALVVVPTRE  
LGMQVTKVARILA  
AKACTVMALLDGGMLRRQKSWVKA  
EPPAIVATVASLQMI  
EKRAFLQSMRVLVIDEVD  
FIGSSKQVSSLRKILTSYSAASSRQ  
TIFASASIPQHNRFVHDCVQH  
KWTKT  
DVVHVHVNVPQMP  
SHLQHKYAI  
CSKKERLHVLLS  
LLEKDAPKSGIIFVAEQSEK  
SKKAGHPPSTTVVVEFLRTTYMGS  
LEVLLLEEDMNFNARATSFT  
EVKKGKGFLLVSTDIAS  
RGFDLPQTS  
HIYNFDLPKTAIDYLHRAGRTG  
REPFSKLACSVTTLIT  
EDEHFVLRQRFQNE  
LKFHCEELPVESMFAFNL

>Os02g05330

MAGMAPEGSQF  
DAKHYSKMQELLHQGDNEEFFTSYDE  
VFESFDDMGLQENLLRGIYAYG  
FEKPSAIQQRGIVP  
FCKGLDVIQQAQSGTGKTATFC  
SGILOQLDYGLVE  
CQSLVLAPTRE  
LAQQIEKVMRALGDYLVGVHACVGGT  
SVREDQRI  
LASGVHVVVGT  
PGRVFDMLRRQSLR  
PDHIKMFVLD  
EAD  
EMLSRGFKDQIYDIFQLLPKIQVGV  
FSATMPPEALEITRKFMNKPV

RILVKRDELTLLEGIKQFYVNVKEDWKLDTLCDLYETLAITQSVIFVNTTRRKVDWLTDKM  
RSRDHTVSATHGDMQNTTRDIIMREFRSGSSRVLITTDLLARGIDVQQVSLVINYDLPTQ  
PENYLHRIGRSGRFRGKGVAINFVTRDDEMLFDIQRFYNVITIEELPANVADLL

>Os02g05660

MAAATASSPATAAAAANSDDDEDNYEEYIPVAKRRAMEADRLRRLRLSKPAPPSSSAAEAAS  
DLPPPPPPPNQPSAGGGGGGLEASAKPSLLVKATQLKRAAPEVTHTEQLIMQEKEMIEH  
LSDRKTLMVRELAKGITYSPLKTGWKPPRLRMRMPRAKADELRRKWHILVDGDDVPPP  
ARDFRDLRLPEPMLRKLREKGIQVQPTPIQVQGLPVVLSGRDMIGIAFTGSGKTLVFLPL  
IMVALQEEMMPIVPGEGPFMIICPSRELAKQTYDVIEQFLVPLKEAGYPEIRPLLCIG  
GVDMRAQLDVVKKGVHIVVATPGRLKDLLAKKKMNLNDCRYLTLDEADRLVDLGFEDDIR  
EVFDHFKAQRQTLTLLFSATMPKKIQNFAKSALVKPVIIVNVRAGAANLDVIEVEYVKEDA  
RIIYLLLECLQKTPPPVLVFCENKADVYIHEYLLKGV EAVA IHGGKDQEERENAI EFFFK  
NGKKDVLVATDVASKGLDFPDIQHVINYDMPAEIENYVHRIGRTGRCGKTGIATTFINKN  
QTETTLDDLKHLLEAKQRIPPVLAELNDPLEDEETMAKESGVKGCAYCGGLGHRVTDPC  
KLEHQKSMIAIGSRRDYGGGGYRGEI

>Os02g10770

MEQEENHSADHLSAQPGNGNELEESSVKERCFEQREALVGEPRCVICGRYGEYICDQTD  
DICSVECKTILLSKLSAETRPVKA AKRVNLPVGDESFCIRDENFPKIPSMHDGQIASLR  
SKLDICVKGEDVDPDIMCFSSSGLPEKLVNLNLEAAGVMP TPVQM QVIPSSICNRSLLVS  
ADTGSKGTASFLVPIIAHCSHVRSERCTDKQGPLAIVLAPTRELCLQVEEQAKVLGKGLP  
FKTALVVGDP LAQQIYRIENGI ELIVGTPGRLIDLLMKHNVDL NKVDVFLDEVDCLE  
RGFRDQVMQIFQALSHQPVMMSATVNSEVEKMSNSLAKNAIHI SCGNPSRPNKS VKQV  
IWVESKQKQKIFEIMTSKQHFKPPAVV FVSSRIGADLLSEAITVATGLKVVSIHGDKTM  
NERRESLRRFLTGEVSVVCTGVLGRGMDLLKVRQVILFDM PNS IDEYVHVQVGRASRMGV  
EGMAIVFVNEEDRNLFREL VQILKTAGAPIPRELANSKYTTGIPLGGGKKRKLKSR

>Os02g42860

MDPRARYPPGIGNGRGGNPNYYNRGPPLQQQHNHHQQQTSAPHHQQYVQRQPQQHHHHN  
HHQQHQQQQQWLRNQA IAREAAAGTDRNSEPKAVAQSPA VDGIDSSSQDWKAQLKLPQD  
TRYRTEDVTATKGNFEDYFLKRELLMGIYEKGFERPSP IQEESIP IALTGSDILARAKN  
GTGKTA AFCIPALEKIDQEKNAIQV VILVPTRELALQTSQVCKELGKHLKI QVMVTGGT  
SLKDDIIRLYQPVHLLVGT PGRILDLT KKGICILKDCSMLIMDEADKLLSPEFQPSVEQL  
IRYLPASRQILMFSATFPVTVKEFKDKYLPKPYVINLMDELTLKGITQFYAFVEERQKVH  
CLNTLFSKLQINQSIIFCNSVNRV ELLAKKITELGYS CFYIHAKMLQDHRNRVHFDFRNG  
ACRNLVCTDLFTRGIDIQAVNVVINFDFPKTAETYLHRVGRSGRFGHLGLAVNLITYEDR  
FNLYRIEQELGTEIKPIPPQIDQAIYCQ

>Os02g55260

MVVAMATKEEEGGPSSRVPHLPWMRNPVDIDSFSGCPVAHLPRLDPRLVKPLQRMGIESF  
FPVQVAAWLETIGPGA FERD ICINSPTGSGKT LAYALP IVQMLATRKVRCLRALVVLPT  
DLALQVKEVDAIAPVVLG SVGSAVGQSSIADEVSNLIEKSKQGLF PSLDEEYIQMEPQT  
KVDILVATPGRLMDHI SMTKGF SLEHLQYL VVDETRMRLREAYQSWLPTVIQLTRSSDQ  
HSWSDMNGETLLHPLTTIRRS GVERGFKGKSF PRLAKIVLSATLTQDP SKLSQLELQHPL  
LLNSGKKRYRIPTKLQSYKLVCKSNL KPLSLIVLLQELRGEKCLVFTSSVES SHRLSTLL  
EFFEDLPFKFSEYSRLQRESTRKTLDAFKEGKIDVLI GTDRMARGIHIDGLRYVINYDM  
PPYVKTYIHRAGRTARAGESGSCFTFLRKHEVKAFDKMLKKADNSSCSLHSLPEESVETL  
RPVFS SALKKLEESLESEATKSKSGDKAPNASKRKRINT

>Os02g57980

MGGGPRTFPGGLSKWQH KRMHEK LARHKERGLLRHEKQLYLARLRSEIRASRLPAAGASP  
PDDGDGPTSSRAHIRALADRFLLP GAEDLWNE DDP IHRADRPRPPRRIVSVGGNGGDRR  
KLDSTKQELPRGGKEPRLA AFNPRRDFQTAAPWWWQWSSSAIPSR TKEASF CFFGPKRS  
YSVMPLFQAHQESSGTS MVPLIARGLASARIAPS QLNGERFY SFAAGRFG RKL RPDSSDE  
DDEDISTAKKDMRFARFGASSEEEESGYDELEARS AIRKKWSSAALRNC DMKKERRALKSY  
EEENNDLAGSFRELREEIKNREVLGAERRRYESRGESLFTNKRFEECGISPLTVKAL TDA  
GYVQTTVVQETALPMCLEGKDVLVKAKTGTGKSA AFLLP AIESVLNAMKSH TNHRVSPIF  
SLILCPTRELAIQLTAEANVLLKYHQGIGVQSLIGGTRFKLDQRRLESDPCQILVATPGR  
LLDHIENKSSFSVRLMGLKLLVLDEADHLLDLGFRTDIEKIVDSLPRQRQTLTLLFSATIPK  
EVRRVSQVLVLRDHFVVDTVGLGAVETPTKVEQLYL VMPHELHFHMVYRLLREHIDQEVD



YKVIVFCTTAMVTEFMYIMLRDLKLNVREIHSRKPQLYRTRISEEFRDSSRLILVTS DVST  
TRGVNYPGVTLVIQVGVPSDREHYIHRLGRTGREGKSGKGI LLLAPWEEYFLNEI HDLPV  
QKSQTPNIDEEMKRKVDGSIKIVDMSIKEAAYHAWLGYNSIGDVGRDKTMLVDLANRFC  
KSIGLEKPPALYRKTKALMGLKDVPGIRIRK

>Os03g01830

MEVAGAQAQAGILPLLLRHPASLRGSLSLSCGGARRSWAAAAATAEGGGGEEGRGYERVPMD  
TPGAYRLVDRATGRSVI VWGGTDDVSMPSPAVLSTTTRVPDRPKENGRSTSIGNFGRLKA  
QKVKVLARRSAHLKREDSGRISTSRFSESPSDESDGTYFERDRARNTQRNSRSRDDKT  
RGAHSLNSVLRQYRGADDLDFPGSEATSGSKRWGNISDVTFGRQNRQKGPLDSGFFSRR  
SFKEIGCSDEILGALRSFGFPRPSHIQAMAYRPVLEGGKSCIIGDQSGSGKTLAYLCPVVQ  
NLRKEEVEGLHRSSPRNPRVVVLTPTAELASQVLNCRSISKSGVPFRSMVATGGFRQKT  
QLES LDQELDVL IATPGRFLYLLQEGFVQLNLRVVLDEVDILYGEESFEQVLHQ LITV  
APLTTQYLFVTATLPLDIYNKVVEFTPDCELIMPGVHRTSSRLEEILVDCSGDDNEEKN  
PETAFSNKKSALVKIIEESPVRKTIIFCNKIETCRKVENALRRVDRKASQIKVLPFHAAL  
DQQQR IANIK EFLNKQTADSMFLVCTDRASRGIDFANVNHVVLFDYPRDPSEYVRRVGR T  
ARGASGNGKAFVFAVGKQVSLARRVMERNIKGHPLHDVPCV

>Os03g06220

MADGGKPTPEKKSWADVEEEEEAKAKAAAAAEEAASSSSSNEPAVDAQAKQIEALSLSVP  
EEHGGSGGGGDDQGPPLLDSDESIQA VTSGGTVYESAAAFEDLKLTPPELLKGLHDEM G  
FSRPSKIQA VTLPMILTPPYKDLIAQAHNGSGKTTFCVVLGMLSRVDPNRKVTQAICICPT  
RELAQQNKSVLMRMGKFTGITCACAIPPAQKDYVPIAKMPKITDQVVIGTSGTLMKWINH  
KKILTNDIKILVFDEADHMLAEDGFRSDSERIMRDIQRSAGGCQVLLFSATFNERVKDFV  
TRVIK DGNQIFVKKEELTLEKVKQYKQVQVDERAKIAVIKDKIFEFGQKVGQVIIFVVRTK  
QSTKDVHNALTLEDYVCSIIQGLDQSEREKIIQEFKNGYTKVLISTDV LARGFDQAQVN  
LVINYDMPIKFGTRDEPDYEVYLHRI GRAGRFGRKGAVFNLLCGETDNTVMRKIETYFQH  
NVPEVRNWQSEEDFERALKDAGLVE

>Os03g12000

MRLTVGQVHRHVLALASSRSCFVLGDNLPLRMLSLPRAVRFHQ TAWLGTETVQDKSASLT  
LASLEGQNKVEYGGKEKATRIGGPKPSSRASALKVKPKVSSFNKPAKSTLPKSAVVKKT  
LKIDESLFSAKSFEELGLPPLLIDRLNKEGLSTPTEVQSAIPIISQKHDAVIQSYTGSG  
KTLAYLLPILSEIGPLKRPTEQDGS DKRS GVEAVIVAPSRELGMQIVREVEKILGPNDKR  
LVQQLVGGANRSRQEEALKKNKPLIVVGTGPRISEISAGGKLHHTGCRFLVLDEVDQLLS  
FNYREDMHRILEHVGRKSGTSSRDILGLPLARRSERQTI LVSATIPFSVIRAARSWGHPV  
LVRAMSVVPLDSITVPRPVLSTQDANPNSPNSV NQA AVNSLPPSLEHYICISKAQHKVD  
TLRRCIHALEAQTVIAFMNNTKPLKDVVFKLEARGMKATELHGDLGKLARSTVLKFKFDG  
EFRVLVTNELSARGLDVPECDLVINLDLPTDSTHYAHRAGRTGRLGRKGTVVVTICEETET  
FVVRKMRKQLAVPIKPCFEFTGKLLVHNEEDVE

>Os03g19530

MSKRPKLGGFSPRPTSYSFERSQPPQRLYVPADDDLDIAFSDDAAAPSDAPPAGGGG  
AAGDEE EIDPLDAFMAEIQEEIRAPPPAPKPEALRRADSDEDDDPVESFLRAKKD SGLAL  
AADAMHAGYDSDEEVYAAAKAVDAGMMEYDSDDNPIVVDK KKI EPI PPLDHSTIEYEPFN  
KDFYEEKPSVSGMSEQEVADYMKSLAIRVSGFDVPRPIKSFADCGFPVQLMNAIAKQGYE  
KPTTIQCQALP I VLSGRDIIGIAKTGSGKTA AFVLP MIVHIMDQPELEKEEGPIGVV CAP  
TREL AHQIYLEAKKFAKPYNLRVA AVYGGVSKFDQFKELKAGCEIVIATPGR LIDLKMK  
ALKMFRATYLVLDEADRMFDLGFEPQIRSI VQIRPDRQTL LFSATMPYKVERLAREILT  
DP IRVTVGQVGSANEDIKQVVNVLPSDAEKMPW LLEKLPGMIDDGDVLFVFAAKKARVDEI  
ESQLNQRGFRI AALHGDKDQASRMETLQKFKSGVYHVLVATDVAARGLDIKSIKTVVNF D  
IAKEMDMHIHRIGRTGRAGDKDGTAYTLITQKEVRFAGELVHCLIAAGQDVPNELMDLAM  
KDGRFRANRDSRKGKSGKGGGGGGGGGGSGARGRGRGV RVDFGLGIGYNAESG SVP  
APRSAALNSLKTGMNQNFKSSFVSASSSNTPSNSAPSRGAPSSFVRPALRGFVSGGTIGG  
DANQARAVLPAPSFVPASRPAENTVENANPNPESSRDRTRERKRPSGWDR

>Os03g36930

MAAATTSRRGPGAMDDENLTFETSPGVEVISSFDQMG IREDLLRGIYAYGF EKPSAIQQR  
AVLP IISGRDVIAQAQSGTGKTSMISL SVCQIVDTAVREVQALILSPTRELAAQTERV ML  
AIGDYINI QVHACIGGKSIGEDIRKLEHG VHVVS GTPGRVCDMIKRRTLRTRAIKLLILD  
EADEMLGRGFKDQIYDVYRYLPPELQVCLISATLPHEILEMTSKFM TDPVRI LVKRDEL T

LEGIKQFFVAVEKEEWFDTLDCDLYDTLTITQAVIFCNTKRKVDWLTERRMRSNNFTVSAM  
HGDMPQKERDAIMGEFRSGATRVLITTDVWARGLDVQQVSLVINYDLPNNRELYIHRIGR  
SGRFGRKGVAINFVKKEDIRILRDIEQYYSTQIDEMPMNVADLI

>Os03g46610

MAKKKDVEVEELDEEVVAAAAAPAADGGEEQEAEPARRPSTFAELGVVPELVAACDAMG  
WKEPTRIQAEAI PHALEGRDLIGLGQTGSGKTGAFALP I I QALLKQDKPQALFACVLSPT  
RELAFQIGQQFEALGSAIGLSTVVLVGGVDRVQQAVSLAKRPHIVVGTTPGRLLDHLTDTK  
GFSLNKLKYLVLDEADKLLNVEFQKALDDILNVI PKERRTFLFSATMTNKVSKLQRACLR  
NPVKVEVASKYSTVDTLRQEFYFVPADYKDCFLVHVLNDELPGSMIMIFVVRTCESTRLLAL  
TLRNLRFKAISISGQMSQDKRLGALNRFKTKDCNILICTDVASRGLDIQGVVVINYDIP  
MNSKDYVHRVGR TARAGNTGYAVSLVNQYEAMWFKMIEKLLGYEIPDRKVDNAEIMILRE  
RISDSKRIALTTMKEGGGHKKRRKNEDDEEEERNAPVSRKSKSFKNSRRR

>Os03g50090

MKRAADGMEKPKFLTREEREKLALERRQAAVTDQRRSALDLLQSLPRPPPPPPPLSNPP  
RDSSSHHRDSSDRDRDRDRDRDRDRDRDRDRDRDRDRDRDRDRDRDRDRDRDRDRDRDRDR  
DRERGD RDRDRDRERGDREKDRLEKMAEREREKELDAIKEQYLGSKPKKRV I  
KPSEKFRFSFDWENTEDTSRDMNSLYQSPHEARLLYGRGFLAGIDRREQKKVAAAHEKET  
RAEQRRKAGLDDRPEDDAVDKKEADAAKYDAFDMRVDHRHTQKSLDEMTERDWRIFRED  
FNISYKGSKVPRPMRWSESKLGTPELLRAVEKAGYKEPSP IQMASIPLGLQQRDVI G IAE  
TGSGKTAAFVLPMSYITRLPPISEENEAEOPYAVVMAPTRELAQQIEEETVKFATYLG I  
KVVSIVGGQSIIEEQGFKIRQGEVVIATPGRLLDCLERRYAVLNQCNYVVLDEADMIDM  
GFEPQVVGVL DAMPSSNLKPENEDDELDAKTIYRTTYMFSATMPPAVERLARKYLRNPVV  
VTIGTAGKATDLITQNVIMTKESEKMSRLQKILTDLGDKPAIVFCNTKKSADARAKDLK  
AGFRVTTLHGGKSQEQRSLDGFNRNRFVTLVATDVAGRGIDIPDVAHVINYEMPSSID  
TYTHRIGRTGRAGKGLATSFLTLENTDIFFDLKQMLIQSNSPVPELARHEASKFKPGS  
VPDRPPRRNDTVYATH

>Os03g51900

MAAAAAASSMAKRKQRKAATEQEVENHDEATVAAEAGPENDGHTAHAAEEAAAAEEGVER  
EGGGEGGAEGE EGPDAARGGEEGKEEEEREVSFDELGLDEQLKRALRKKGLDKATPIQR  
EAIPLILEGKDVVAKAKTGSCKTFAYLLPMLHELLKLSAEGRIRKSAPNVF ILVPTRELC  
QQVHNEASSLLEFCTSKLKVVQVNASMSDKDIKVALSGPPNILVTTTACVASCISKGIIR  
GSSIKESLSMMILDEADLLL SYRCEDDIKALVPHIPRSCQSILMSATSSADIEKLTKLLL  
HNPFI LTLTEVGHAKDDLIPKNVQQFWISCDAKDKMLYILVLLKLELIQKKVLI FVNSID  
SAFKLRLFLEKFGIRSSVLNAELPQNSRLHI IQAFNARLFDYLIATDDNK SKEERQANKG  
NKKDSRVS RKQLQQTLD AEFVVRGIDFKNVFTVVNYDMPPDPAGYVHRVGR TGRANKTG  
ASISLVSPKENGIFEDIENMLKDVENRDTSCISPFPLLTKNAVESLRYRAQDVARSVTTR  
DIKEARRQDIKNEILNSEKLAHF DENPRDLDLKHKDKLLSNKEIPAHLRDVPEYLI DPT  
TKEASN VV KLSRAAMDIDKPRRRKRMGFKGSGRSSDPLKTFSAEGKSRRRGRKERDGEQ  
DRRKRKKVES

>Os03g58810

MAPAPATTSSSKRSKRKQPVAPPPESDSESEELSYDTAAADEEEEGEEEAPNQMEELEEE  
QEEKKEKKQKKEMSKEKKRKEKGNEGSGILTNMLFSELGVSEPTARAIREMNYTYLT  
QIQARSIPHLLNGKDVMGAAKTGSCKTLAFLIPAIEMLHHAHFMPRNGTG VVVVCP TREL  
AIQTHNVAKELMKYHSQTLGYIIGGNRRGEADQLAKGVNLLVATPGRLLDHLQNTKGF I  
YRRLKCLII DEADRLL EQNFEDMKQIFKRLPLNRQTVLFSATQTEQVKEFAKLSFEKNE  
ESTSKPVYVGVDDAETNATVEGLQQGYCVIDSARRFLVLYAFLKQKQKVMVFFSSCNS  
VKFHAELLNFLQIECSDIHGKQKQKRTTTFFNFCKAEKILLCTNVAARGLDIPDVDFI  
VQYDPPDEPKDYIHRVGR TARGEKKGGEALLFLLPQELKFLIYLKAAKISLTEL VFNENK  
V PNLQSHLENIVGENYFLNQSAKEAYRSYILAYDSHSMKDI F DVHNLNLKDVAASFCKN  
PPKVNIDLESSASKHRRKMRKVDGRRHGI SAANPYGRKGGDDKRQFARF

>Os03g59050

MRSSWADSVANAEE SAPATGAAPT PVANHQNSRPTRSAYVPPHLRGQAPT TTAAPAPAPG  
PAAVQPSASVQPSGYAAIVGGSRWAGPASGDGTGAVGGPRQSVGGRRGGGGGGGWN SRP  
GWDRRDREPNPFANSEAEATEVDFDTANTGINFDAYEDIPVETSGHDVPPPVTFAEID  
LGDALNENIRCKYVKPTPVQRYAIPIS IAGRDLMACAQ TGSCKTAAFCFP IISGIMSSR  
PPQRPRGSRTAYPLALILSPTRELSVQIHEEARKFAYQTGVRVVVAYGGAPIHQQLRELE



>Os06g48750

MAGMAPEGSQFDKHYDSKMQELLNQGETEEFFTSYDEVHESFDDMGLQENLLRGIYAYG  
FEKPSAIQQRGIVPFCCKGLDVIQQAQSGTGKTATFCSGILQQLDYAVVECQALVLAPTRE  
LAQQIEKVMRALGDYLGVKVHACVGGTSVREDQRILASGVHVVVGTTPGRVFDMLRRQSLR  
PDYIKMFVLDEADEMLSRGFKDQIYDIFQLLPSKIQVGVFSATMPPEALEITRKFMNKPV  
RILVKRDELTLLEGIKQFYVNVKEKEEWKLDTLCDLYETLAITQSVIFVNTRRKVDWLTDKM  
RGRDHTVSATHGMDQNTDRIIMREFRSGSSRVLITTDLLARGIDVQQVSLVINYDLPTQ  
PENYLHRIGRSGRFRGKGVAINFVTRDDERMLFDIQRFYNVVIIEELPANVADLL

>Os07g05050

MFSLLSRALCAASSSPAAPRGRSLLAALLSPSASPLDPCRGPAAPEPPRRRAFHGSPSPL  
GFRSTPASWSSPEAGAAVGGDDGLEVARLGISPWIVERLAARGITRFLPIQRAVLDPAMQ  
GKDMIGRARTGTGKTLAFGIPIMDRILRHNEKNGSGRNPLAII LAPTRELARQVEKEFKE  
SAPLDSLVCVYGGVPI SHQMRALNYGVDVVVGTTPGRI IDLLRRGVNLNSEIQFVVLDEADQ  
MLAVGFDEDEVEVIMENLPQNRQSMLFSATMPSWIRKITSKYLKDP I IIDLVGDEDEQKLPE  
GISLYSIASEHYGKPSILGPLIKEHANGGKCI VFTQTKREADRLAYAMGRSYACQALHGD  
ISQNQRERTLSGFRDGRFNILVATDVAARGLDIPNVDLVIHYELPNTSELVHRSRGTAR  
AGKKGSAILIYTNDQARAVRIIEQDIGCKFTELPKIEVADEASDMFNVRDNR SRLAGSP  
RTGGSSFGGGYGGFGEGRSRGFGDFDGFSSPNRGGRSRDAGSRYGSGFGDFRRP SNAF  
GRSSSKQPDGFGDFGEGNF SRNGNRRSRSFDDSGSTRYSRRPNGFGTSDFGRSGGFDD  
SN

>Os07g10250

MRSSWADSAANAEE SAPAAAA NHGNSRLPRSSYVPPHLRGQAAPAAPAQAGALPSAAAAA  
QPSVGGQPGVGGPRWAGIVNGGGGGGGGSSVGGSRQFGAGGGGGGGGGGAWNSRPGGW  
DRRDREPPDFANSEAAEVD FEAGENTGINFEAYEDI PVETSGHDVPPPANTFAEIDLGDAL  
NENIRRCKYVKPTPVQRYAIPIS IAGRDLMACAQ TGS GKTA AFCFPIISGIMRSRPPRS  
RGSRTAYPLALILSPTRELSVQIHEEARKFAYQTGVKVVVAYGGAPITQQLRELERGVEI  
LVATPGRMLDMLLERARVSLQMIKYLALDEADRMLDMGFEPQIRKIVEQMDMPRGERQTM  
LFSATFPKEIQRMASDFLADYIFLAVGRVGSSTD L I VQRVEFVLDADKRSYLMDLLHAQR  
ANGTHGKQALTLVFVETKRGADALENWL YNNGFPATS IHGDR TQQEREYALRSFKSGATP  
ILVATDVAARGLDIPHVAHVINFDL PNDIDDYVHRIGRTGRAGKSGLATAFFNESNTPLA  
RPLSELMQEANQEV PQWLERYAARSSFGGGGRNRRSGGARFGGRDFRRDRGSGGGGYG  
GGGGYGGGGYGGGGGGGGYGGSSYGGGGQGFSSAWD

>Os07g20580

MGRSMLPEQQEDVSRKSKKEKSKKDKKRKLEAEAEVVVVEAAAAATSTDEATKSSKKKRA  
KGD LGQGEAAENGGGKVAVT GKG SADAKYAPLSSFAATALPPQVLD CCKGFERPSP IQA  
YAWPYLLDGRDFIGIAATGSGKTI AF GVPALMHVRRKMGEKS AKKGVPRVVLVLSPTRELA  
QQIADVLCEAGAPCGISSVCLYGGTSGKPQISALKSGVDIVIGTPGRMKDLIEMGICRLN  
DVSFVVLDEADRMLDMGFEPVRAILSQTASVRQTVMF SATWPPAVHQLAQEFMDPNPIK  
VVIGSEDLAANHDVMQIVEVLD DRSRDSRLVALLDKYHKAQRNRVLFVFLYKREATRVET  
MLQRRGWSAVSVHGDKAQHDRTKALSLFKEGSCPLMIATDVASRGLDIPDVEVVINY SYP  
LTTEYD VHRIGRTGRAGKKGVAHTFF TQENKGLAGELVNVLREAGQVVPALTKFGTHVK  
KKE SQIYGSHFKEIKADAPKSTKITFGDSDED

>Os07g33340

MRRPRSRGA AKQTRLREADEIRLLEAWIDAGKPARGTRPPPLSKSSSSPADTAAAKRGAK  
GAGGVPSKAAGEHPEYGACARFDELPLSNKTKDGLRKAGYTEMSEIQRAALPHALCGRDV  
LGAAKTGS GKT LAFVIPA LEKLYRERWGPEDGVGCIVLSPNKDLAQQIFNVFQKVGKLG  
FSAACIVGNRKLDEEKAVINNMN I LVCTPGRLLQHMGETT NFDCSQIQILVIDEADQVL  
DKNFQEQVDNVVSQLPKVRQTLLFSATQTKSVKDLARVSLKDPEYISVHEEATTATPDTL  
EQYAMIVPLEQKLNMLWSFIKRHLKSRILVFLSSVKQVKFVYEVFKKLRPGISLR CMHGR  
MKYEVQQAIVAEFKEGHSVLFSTDI FARGLDIEDVDVWVQVDCPENIALYIHRVGR TARY  
NKRKALIFLCPEEEKMLEK LKAAESKIPIHIKKPNTEQLQQISQNIASVLVQYPNLQQL  
GKRAFVTYLKS VYLQSDKEVFDLSRFSMENFAAYAASLGLPVT PKIRFVSHKKNVPK KYM  
GDIDVKRMKRSSKPEVIEINPQAKSNLIEDDGDYDILYPKEQQTDVNMADGLDDVLYPKV  
STADTNNEPEKVTQLGNKSVK KKKL INVHRPLGTRVKFDDEGHTIPPFASIAEEVGS GD  
VIDKDKISQRYAEMLREMQEHDKEDKLEHKRILREKKLQK KKLKRKRNEEMDAGSENSG  
SESDRDQRTASKGKKRYFNSDDEEGSKDAAKDGDVLAQQEALALKLLSKMHS

>Os07g43980

MEVDGEARPFLLFSKPKSSKKKPKQEAEPQVHTQPEEPPNPSPSPAIEPDLRDSDEAPAA  
AVTEHAGDDAAAAAVPSTFAELGLSQWLVDVCDLGMRVPTAVQRRICIPRALEGRDVLGI  
AETGSGKTAAFALPILHRLGEDPYGVAALALAPTRELAAQLAEQFRALGAPLGLRCLAAI  
GGFDSLQAKGLARRPHVVVATPGRIATLINDDPDLAKVFARTKFLVLDEADRVLDINFE  
EDLRVIFGSLPKKRQTFLFSATISDNLRSLLELSGNNSYFFEAYEGFKTVDTLKQLYIHV  
PPDAKELYLFYLLSKMNEDNIRSVIVFVSTCRTCQYLDLLEELGHPAVSLHSHKPSRR  
LAALHNFKSSKVPVLLATDVASRGLDIQTVDLVINYDVPYPRDYIHRVGR TARATRGLL  
SISFITTTQRDIRLLHEIEDVVGKQLGAYDGMERDVNKNKDATKVFKARRLANMKMADEGHED  
KVQARKEQKKRAQERKRKHDE

>Os07g45360

MEKAKLSSALFAGTHFDRKRFAGDFARFRQPPAPDVASAAAAPSPEKKRKRQSKAKAKKS  
KKRRAEGADSASDAVEGFSVFKGLAAKDEDDSEKKVETGKSEDSEVRRRKEVEREIER  
AAILRKKFDIHSIGNVPAPLENFEELVSRYGCDLSYLVGNLSKLGFEPTPIQRQAIPIL  
LSGRECFACAPTGSKTLAFLFPIILMKIKPGSKEGVKAVILCPTRELAAQTTRECKKLAK  
GRKFYIKLMTKDLKSGNFKDMHCDILISTPLRLDHAVQKRDLDLRVEYLVLDESDFKLF  
ELGFVEVIDSVVKACSNPSIIRSLFSATLPDSIETLARTIMHDAVRVIVGRKNSASSLIK  
QKLIIFAGTEKGLLALRQSFASLNPVLIIFVQSKERAKELYKELAFDDVRADV IHADLD  
EEQRQDAVDNLRAGKTWVLIATEVIARGMDFKGVNVCVINYDFPESASAYIHRIGRSGRAG  
RSGEAITTFTEEDKPFLLRNIANVLISSGCEVPSWIKALPKLKRKKHRVNRDPISTLPDED

>Os08g05810

MEEEEVVVVVDEEESERRRQKMIIEEEKRLDEEMELRRRRVKEWQEQKRLEEEEAKRREQ  
EAAAGAGTPAAAAGADGDSNAGKKWTL DGEESDEEGYKEDSQNAEDDGGITADLPSEVND  
ANVAAPMEEDEIDPLDAFMSSMVLPEVAKLETAVASME SMPASNMGDKNGKSAKDAVSNG  
DKKGQKKAMGRIMQGDSDSDYDDDDDEGGSKDEDEEFMKRVKKTVEKLAIVDHSKI  
EYQPFKRNLYIEVKDITMGTGEEVATYRKNLELKVHGKDVPKPIKTWVQSGLTSKLLDTI  
KKLGFKEKPMPIQAQALPIIMSGRDCIGIAKTGSGKTLAFVLPMLRHVKDQPPVPGDGP  
GLIMAPTRELVVQIHSIDIKKFAKSLGINCVAIYGGSGVAQQISELKRGAIEVVCTPGRMI  
DILCTSSGKITNLRVTFVLMDEADRMFDMGFEPQITRIVQNTRPDRQTVLFSAI FPRQV  
EILARKVLT KPVEIQVGGRSVVNKDITQLVEVRPENERFLRLELLGEWFDGRGKILV FVH  
SQDKCDSLKDLFQRGYPCLSLHGGKDQTDRESTLADFKSNLELVVNYDVPNHYEDYVHR  
VGRTGHAGRKGFVTFISDEEERYAPDLAKALELSEQAVPQDLKGLADRFMAKVKGTEQ  
AHGTGYGGSGFKFNEEEDARRSAKKAQAREYGYEEDKSDSDSDEEGGVRKAGGDLAAQA  
IAAAQAAATLAAAKAASNANQQVQSTNAGSLLSIPVVANAPNNEATARALQAALNIQQNL  
ARIQAHVVPEHYEVELDINDFPQNARWKITHKETLGP IQDWTEAAITTRGTTFIPQGKIVG  
ANERKLYLFI EGPTLSVKKAKSELKRVLEDCANHALNLPGSAQTGKTANSEM QGFLVKV  
FLGRWTAI LVFLDDGVICNIRAELDKWQVRVVFYVKVADPLGYSITE

>Os08g06344

MGSSDEAGSSKHRRDKEKDRERSSSRHHRRDRDRERSSSRHHHREDRDRDRDRDRERR  
HREKDREREERKAREEREKEKERERARRREERDREERSRRREAAAAEEEEEDVDRDRKR  
RRRS SHHHHHRDAREPEGPASGAREEEVVDVEEAERRRQKKKEEEQKQLDEEMETRRRR  
I KEWQEMKRREEETKRREQEEAGVGTSAAAAAAPAEAEEDGGNAGKKWTL DGEESDEEGNQE  
DGKKSDDNGSGGAGAMDVDPNGGDNANGANAMDEDEIDPLDAFMNSMVLPEVAKLESMP  
AANVDDKNDKSAKDAVTNGDKKPKVMGRIIQGEDSDSYADDEDDEGGSEDEDDEEFM  
KRVKTKAEKLAIVDHSKIDYQPFKRNFIIEVKDITKMAAEEVAAYRKQLELKVHGKDV  
PKPIKTWVQSGLTSKLLDTIKKLGFEKPMPIQAQALPIIMSGRDCIGIAKTGSGKTLAFV  
PMLRHVKDQPAVVPDGP IGLIMAPTRELVVQIHSIDIKKFSKALGINCVAIYGGSGVAQQ  
ISELKRGAIEVVCTPGRMIDILCTSSGKITNLRVTFVLMDEADRMFDMGFEPQITRIVQ  
NTRPDRQTVLFSATFPRQVEILARKVLT KPVEIQVGGRSVVNKDITQLVEVRPENERFFR  
LLELLGEWFDGKILV FVHSQDKCDSLKDLFQHGYPCLSLHGGKDQTDRESTLADFKSN  
VCSLLIATSVAARGLDVKELELVVNYDVPNHYEDYVHRVGRTGRAGRKGFVTFIS EEEE  
RYAPDLVKALELSEQAVPEDLKGLADRFMAKVKGTEQAHGTGYGGSGFKFNEEEDARK  
SAKKAQAREYGYEEDKSDSDSDEEGGVRKAGGDLAAQAI AAAQAAAAMVAAKAASNANQQ  
TQGT SVGPLLPLAIASNTQNNNEATARALQA AFNIQQNLARIQAHAVPEHYEAELEINDFP  
QNARWKITHKETLGP IQEWTGAAITTRGTFFPQGKIVGANERKLYLFI EGPTLSVKKAK  
AELKRVLEDCANHALNLPGSAQTGKYSVI

>Os08g32090

MARLNPSKPSRRGGKPRSSSADAMAHEHKPLPGRPKREGEASKRKAKSGGFESMGLCEEV  
YRGVVRHKGVRVPTPIQRKAMPLILAGHDIAAMARTGSGKTA AFLVPMIQRLLRRHDAGAGI  
RALILSPTRDLATQTLKFAQQLGKFTDLKISLIVGGDSMESQFEELAENPDI I IATPGRL  
VHHLAEVEDLNLRTVEYVVFDEADSLFSLGLIQQLHDILHKLSDTRQTLF SATLPQALA  
DFAKAGLRDPQIVRLDLDDKISPDLKLAFFTLRQEEKLAALLYLVRERISSEEQTIFVVS  
TKHHVEFLNILFREEGLEPSLSYGAMDQEARNIHISKFRARKTMILIVTDVAARGLDIPL  
LDNVVNWDFPAKPKLFVHRVGRVARQGRSGTAYTFVTSEDMAYLLDLHLFLSKPLRPAPT  
EEELLKDMEGMNLKIDRALANGETVYGRFPQTIIDLVS DGIKEVINGCTDLIALEKPC TN  
AFHLYLKT RMPSTESIRRVKDLPREGLHPIFRDVLGSELSALAFSERLKSFRPKQ TIL  
EAEGEAARGSNQWLDVMKKKREVHEGIINLVHQNNVDHEPKEELVENISNWERKDVCGN  
KRKLQSF RDEEYYISSVPQNHLEAGLSVRANEGFVENRLDAAVLDLVDDDETSGMQAOKT  
RYHWKKNKFVKLNSGDRVTATGKIKTESGAKLKPTKTGIYKKWQKQTHR SIDTGRKFGGF  
AEEGASTTGS HQRGNRKHTAVGRGRRYIPNADVPSEIRNPEQIQKSRQQKAMD IARMKNR  
STKESKFQKFQKNNRRHDGPLKDGKFKQNNRRPDGNGKNRRPDGNGKGRGKGNANGFGK  
GKGKMKGKGT R

>Os09g21520

MALHHLRHAPLALRLARLRLAPSPPPPAARLLLLLAPSQHPAPPWRLLSRPRALATAAA  
EADDAGAGNGDGDGDFSEESTSWESLGVSDRLASALHGAGLARPSLVQAACIPHVLT TN  
DVI VAAETGSGKTHGYLVPLIEKLC SKSISAEDGNSQDVTSGSPNIALVLCPNVMLCEQV  
VRMANSLVDES GEPLKSAAAVCGPKGWPTVRPDILVATPAALLNYLFDYDPEKRRRERFL  
RNVKFI V FDEADMLLCGSFENQVIRLIHMLRFDEKLLSRMEDSGKEISLGD TNEYREDS  
SQSAELSADDEENEDGLVQHRPVNVENAHIGAHKKDWRRVRKVYRRSKQYVFVAATLPQS  
GKKTAGGVLKRMFPNAVWVSGAYLHRHNPRLERR WIEVTADTQVSALLDAVKYGLKNEVH  
DTKLGPNRTMVFTNTVDAANSVSDILQRVGVPCILYHRDSSLEERAKNLQSFRENGGVLV  
CTDAAARGLDVPNVSHVIQV

>Os09g34910

MPSLPVAAAEPMAVDESASKKSKRKLKAAEVEVEASSRKEKKEKRRKAKEPSPSSSSSS  
EEEESSSTSSDEPAPA AKKAKKEKTKEKVVVEEEEEEDDEGELTASGDEDPADPNALANF  
RISESLREKLKSKGICALFP IQATTFDLVLDGHDLVGRARTGQKTLAFVLP ILESLVNG  
THKASRRTDYGRPPTVLVLLPTRELAKQVHTDFAFY GATFGLSACCVYGGSDYRSQEMAI  
RKGVDIVVGT PGRVKDFVEKGT LNFRSLKFRVLDEADEMLNMGFVDDVELILGKVEDVTK  
VQTLF SATIPEWVKKLSLRF LKSGKKTVDLVGDEKLKASASVRHLALPCNRAARAQVIP  
DIIRCYSRGGRTIIFTETKESASDLSGLIAGSRALHGDVAQAQREVILAGFRSGKFLVLV  
ATNVAARGLDINDVQLIIQCEPPRDVEAYIHRSGRTGRAGNTGVAVMLFEPYKFNVNR I  
ERESGVKFEHISAPQPTDVAQSAGTEAAEAISSVSDSVIPVFREQAQLLNSSGMSAVDL  
LAKALAKAVGYTDIKKRSLSSMDNHTTLLLTGTRSVYAAAGFVLSTLKRFMPEERLADVK  
GITITADGTGAVFDVPSAEVEDYIQGAQNAAMVTVEEVKQLPPLQEREQSGGSRGGGRFG  
NRRFSGGGGRGGGGRGFGGGRGRGGGGGNRFNKRY

>Os11g46240

MAATEAATDSSGPRYAPDDPTLPAPWKGLIDGSTLYYWNPD TNETQYERPVA AVPPLP TG  
PPPVT TTPMPTSASGAFSQPSMQSNQGGQVSQSQQERPGQTVYPQASHLGHQQLQOPTQQ  
SPFQPTAQHQAPFQHSQRAPYQQQQQQMSQQPPAHQYPS THPQHMPYQHGHYMQPQQQQF  
QQGPQYSYQVQQQQMPQAAYNQGGQQPI SQAAYNQSQPAQAVGAYNQGGQQPPV SQASY  
NQSQQPTQAAGAYNQGGQPSMPQASYNQVQPPQMAHATYNQGGQQPPGMRIPQGGVQPQQS  
PGFHQPAQVSQVLQGSQSQGLQMPQQGQLQHGFHLTTPQ GKQPHHGHVGPQLSQVPLGQ  
QSSTLKVDETGV TGGLDGKQTGFSLPLSQQRGQGPVSKQQLPSNHQLSGSHNQPNIPGAG  
GPSYPAKHHLGGSSPGEANNMFLSSPAQM HQGGMDTNYRQHPASSPVV PNHIGPSVVRP  
PMGFKMGSS EDHFERNELYSSGRMDGTNNLQQQPKLAALPPLNRPQDMRNGPPYPQPDNL  
GAFNMGPPHSV PNLHNHGFPEASMRPPSRMFAPPNFPSIASADAYRQHHEVTAVGENVP  
PPFMTFEATGFPP EILQE IHAAGFLNPTPIQAQTWPVALQNRDIVAIAKTGSGKTLGYLI  
PAFIHLRRYQNNPMLGPTVLVLA PTRELASQIQDEAVKFGRSSRVSCTCLYGGT SKGLQL  
RELERGADIVVATPGRLNDILEMRKISLHQVSFLVLDEADRMLDMGFEPQIRKIVDEIPR  
NRQTLMYTATWPKEVTKIAGDLLKDPVQVNI GSIDELVANKSITQYVEVPPLDKQRRLE  
QILRAQERGSKV IIFCSTKMKCDQLARDIGRSFGAASIHGDKSQAERDNVLNQFR TGRAP  
ILVATDVAARGLDIKDIRVVINYDFPTGIEDYVHRIGRTGRAGATGVSY TFFSEQDWKYA  
GDLVKVLEGANQHVPPELQEMAARGAAGAPRNQAGGMSRWDPGGGGNRFE SAVGIPGSY  
GGIRDGPGGFGRDGPGGFGGRDGPGGFGGRDGPGGF IGREGPGGFGGREGPVGFGGQES  
PGGFGRKGP GAFEGREGAAPGSFGGRRGGRGPGGFGGGGSPGGFGGRGGRGDSHGFGG

RGRGDFSGFGGRGRGDSGSGFGGRGRGDFSGGRGGRGRGFGGRGRSDRGP HDRF I SDGRGR  
YDNRGFGGKGRDRSYSRSPDRGRSRGYDRRSGSRSLSSRSR.SRSR.SRSR.SRSR.SRSR.SRSR  
SRSR.SRSR.SRSR.SRSR.SYDQGAGPARRPRPRSGFDVLPATGAGPASTGPGPVAVPAPGSAG  
PVPPQVPAQSLADASAMSPMSPGGLAQEGAPFNGGNDGGLVPAQGVLPFQGS DVAMP PNF  
AAAAEAFPGPAVEQEAPDV

>Os12g29660

MDADFRFDPDGSDDDGAAASAAAGRKRPAQSPWEFSSYAESVAAEHARRRRTTS IDEK I SQ  
ALSGSRRGGKPSIPDGDSEGEDDDSEVEDDSEEDDKEVVEGEIDDEEDEVVEESEDDEGV  
EVSDEEVEELEEKGKEEKSDVEVEEGEGQDGEKEEKEEGDEEAEEEEETDKKSGVVDP  
KFFASSEGASFHANSFLELNL.SRPLL.RACEALGYQKPTPIQAACIPLALTGRDICGSAIT  
GSGKTAASFSLPVLRLFRPKRVP.AIRVLI.LTPTRELAAQVHSMIEKLAQFTDIRCCLIV  
GGLSTKVQ.EVALRSMPDIVVATPGRIIDHLRNSLSVGLLEDLAILILDEADRLLLELGFSAE  
IQELIRMC.PRRRQ.TMLFSATMTEEINELVTL.SLNKPVRLEADPSLKR.PATLTEE.VVRI  
RRAREANQEAVLLALCLKTFKDKVIFSGTKHSAHLKIFGLSGMKAAELHGNLTQAQRLE  
ALEL.FKKQEVDFLIATDVAARGIDIVGVRTVIN.FSCPRDARTYLHRVGR.TARAGREGYAV  
TFVTDDDRSLLKAI.AKKAGSQLKSRI.VAEK.PVAECAK.LIEELEDQISTIIQEEREERILR  
KAEMEATKAENMIAHKDEIYSR.PKRTWF.FATEKEK.KLLAKA.AKESTS.QGKSNSGVI  
SAQQAEDLRLKEKRREREK.NLPRKRRRLEA.EREMLEDESEDEEEAKE.SKGGKKEKKGQ  
SLVDVAYRRAKSMKASGKRGAGTGK.GKNDK.KAKQHSGKGPTRQEEMQELFQNDMSEWKQGR  
SLKKNNVMRKKSKNSFKSKSRYNRRK

>Os06g33520

MRRHHLLGLLRRATASPTPASRRAGPPLPGLLQDPLRNGAAAAGPRFFSSRAGPGAGAA  
AKSLIEDEAE.LSDWISDLK.TDSFHLGLSSGDEGEASTRGPAA.SRGGRRGRDRSGPPRSR  
FGGGDFGGDRGFERRGR.MVSNNELGDDDDDEDEVGFGSARGRRDRGGRQSEF.SHRGRRG  
NDRGGRQSEFSYGGRRAND.FDDGGGFRSTRGQRGRGRLANVSRRGYDFDDEPGFQSPK  
GQRGQGGRYSDLDDDEGGF.GSLRGRGRGGRMSGVSRRGGRGSDLDDSEDEYSRGS.SPR  
GRRGRGGRMSGVSRKGGRS.DLDDSEDDENDSIDSRGRRRDHGTRGRNVGSLGPQRGGRG  
GDADFSDRRSRGKM.FDFGLSEDDSELGEVDEDDG.PSGFEDDLFDDEGGK.NLVESPAKN  
SAPFESIKGEPIDQEGVVHTRESGGGDSYLSQTSIKLWTYGEISKDAIVLILSLNCFSS  
PYHVLTSLIYIGKDV.LAKAKTGTGKTVA.FLLPAIEVVS.KLPPIDCDK.RPPI.SVVVVCPT  
RELADQAAAEANKLLKF.HPSIGVQLVIGGTR.MALEQKRMHTNPCQILVATPGRLKDHMEN  
TPGFATRLMGV.KVLILDEADRLLDMGFRTDIERI.VAALPKQRQTLLFSATVPDEVRQVCH  
IAMKRDLEFVNTVEEGSEETHS.QVKQMHVVAPLDKQFSILYGLLTDHISENV.DYKVI.VFC  
TTAKV.TSLVAELLSELKLN.VREIHSRKP.QSYRTRISKEFKESKGLILVSSDV.SARGVDYP  
NVTLVVQMGVPTDRE.QYI.HRLGRTGRRG.NEGSGILLAPWEEYFLRSIKDLPITEATLPL  
IDLDTKRKVEKALAHVEVKDE.LAYQAWLGYYNS.NKFIGRDKYQLVSLANEF.SRSLGLNN  
PPAVPKLVLRKMGLNNIPGLRSK

>Os10g35990

MHHPRARYPPGYTSGGGGGGGGGGGGRNGGGGGFGGGGGGGGNHGYGRGPQPQQQ  
HYHHQAQQLHQHQQQQA.HQRNSSSQQQWLR.RDQATAAAA.SGEVAARTAAQLEAVDSSS  
EDWKAQLNL.PAPDTRYRTEDVTAT.KGNEFEDYFLKRELLMGIYEKGFERPSPIQEESIP  
IALTGSDILARAKNGTGKTA.AAFCIPALEKIDPEKNAIQVVILVPTRELALQTSQVCKELGK  
YLNIQVMVSTGGTSLKDDIM.RLYQP.VHLLVGT.PGRILD.LTRK.GICVLKDCSMLVMDEADK  
LLAPEFQPSIEQLIH.FLPANRQLLMFSATFPVTVKDFKEKYLP.PRYVINLMDELTLKGIT  
QYYAFVEERQKVHCLNTL.FSKLQINQSIIFCNSV.NRVELLAKKITELGYS CFYI.HAKMLQ  
DHRNRV.FHDFRNGACRNLVCTDL.FTRGIDIQAVNVVINFDFPKTSETYLHRVGRSGRFGH  
LGLAVNLITYEDRFNL.YRIEQELGTEIKTIPPQIDLAVYCQ

>Os11g38670

MATPSRTSWADVADAD.PAPAPAPAANGPAR.PDRSSYVPPHLRNRGASSGGGAAAPPPSSS  
SSSAPPRAAPGLLAP.RPAAAGMGRMGGGGGGGGGFGGPRRWDR.EPNPFGNDGDAAAGAGD  
EPEV.FDAHQNTGINFDAYEDI.PVETS.GREVPPVGTFAEIDL.GQALNDNIRRCKYVRPTP  
VQRYAIPISLAGRDL.MACAQTGSGKTA.AAFCFPIISGIMR.GPPAQR.PQRGGMRTACPLALI  
LSPTRELSMQIHEEARK.FSYQTGVRVVVAYGGAPINQQLRDLERGV.DILVATPGRLVDLL  
ERARVSLQ.SIRYLALDEADRMLDMGFEPQVRRIVEQMD.MPPP.GARQ.TMLFSATFPKEIQR  
MASDFLENYIFLAVGRVGSSTDLIVQRVE.FVQ.EADKRSHLMDLLHAQRDSATPGKPTLTL  
VFVETKRGAD.SLEHWLCMNGFP.PATSIHGDRNQ.QUEREYALRSFKSGHTPILVATDVAARGL  
DIPHVAHVNF.DLPNDIDDYVHRIGRTGRAGK.SGLATAFFNENNSSMARSLAELMQESNQ

EVPAWLSRYAARPSYGGGGGRNRRSSGGGSRFGGRDFRRDSSSSGRGGGDYGGGSSGGAGG  
YGGSSAYGGGGYGGGAGAPSAWD

>Zm2G018947

MAAPTTSRRGPGGARNMDDENLTFETSPGVEVVSSFDQMGIKDDLRLGIYGYGFEEKPSAI  
QQRAVLPI INGRDVIAQAQSGTGKTSMSLTVQCIVDTAVREVQALILSPTRELASQTER  
VMLAIGDHLNVQVHACIGGKSIGEDIRRELENGVHVVSSTPGRVCDMIKRRTLRTRAIKLL  
VLDEADEMLSRGFKDQIYDVYRYLPELQVVLISATLPHEILEMTSKFMTEPVRIILVKRD  
ELTLEGIKQFFVAVEKEEKWFDTLCDLYDTLITITQAVIFCNTKRKVDWLTEKMRSNNTV  
SAMHGDMPPQQRDAIMGEFRSGATRVLITTDVWARGLDVQQVSLVINYDLPNNRELYIHR  
IGRSGRFGRKGVAINFVRKDDIRILRDIEQYYSTQIDEMPNNVADLI

>ZmG027995

MAGMAPEGSQF DAKHYDSKMQELLSTGETEEFFTSYDEVFESFDDMGLQENLLRGIYAYG  
FEKPSAIQQRGIVPFCGLDVIQQAQSGTGKTATFCSGILQQLDYGLVEQCQALVLAPTRE  
LAQQIEKVMRALGDYLVGVHACVGGTSVREDQRILASGVHVVVGTTPGRVFDMLRRQSLR  
PDNIKMFVLDDEADEMLSRGFKDQIYDIFQLLPSKIQVGVFSATMPPEALEITRKF MNKPV  
RILVKRDEL TLEGIKQFYVNVKEDWKLDTLCDLYETLAITQSVIFVNTRRKVDWLTDKM  
RSRDHTVSATHGDMQNTRDIIMREFRSGSSRVLITTDLLARGIDVQQVSLVINYDLPTQ  
PENYLHRIGRSGRFGRKGVAINFVTRDDERMLFDIQKFYNVLIIEELPANVADLL

>ZmG030659

MGSGDDERSTSKHHHRDKDKDRDRSSSRHHRDKDRDRERSRHHRRDDGDRDRDRHHRDKD  
RDREERKEREREERKAREREERKAREREEREERDREKEKEKEKERARRREERDREERESS  
RRRGDADGEEDDDRDRKRRRRSSHHHHRDPEPEPEPASREEEVDAEEAERRRQRKKEED  
MEAEQQLDDEMERRRRRKEWQEKRRRQQQDGSVASGASAAVAEADGAKAGKKWTL  
GEESEDEEDKEDGKKAEGNGGAGDMVGLPSGNGDANGGAEMEEDIDPLDAFMNSMVL  
EVAKLESAAVAMDTAPAAGADGKNGKSSKDVISNGDKKGSRKATGRIMQGDDSDSDYDDA  
DDD GAGEDDEDEEFIKRVKKTAKAELAIVDHISKIDYQPFKRFYIEVKDITKMTSEEVV  
DYRKHLELVHVKDVPKPKIKTWVQSGLTSKLLDTIKKLGFEKPMPIQTQALPIIMSGRDC  
IGIAKTGSGKTLAFVLPMLRHVKDQPPVPGDGP IGLIMAPTRELVVQIHSDIKKFSKVL  
GINCVAIYGGSGVAQQISELKRGAIEVVCTPGRMIDILCTSSGKITNLRRVTFVLMDEAD  
RMFDMGFEPQITRIVQNTRPDRQTVLFSATFPQVEILARKVLT KPVEIQVGGRSVVNKD  
ITQLVEVRPDTERRFRLELLGEWYVKGKILVVFVHSQDKCDSLKDLFQHGYPCLSLHGG  
KDQTDRESTIADFKSNVCSLLIATSVAARGLDVKELELVVNYDVPNHYEDYVHRVGRTR  
AGRKGFAVTFISDEDERYATDLVKALELSEQAVPQDLKALADRFMAKVQGT EQAHGTGY  
GGSGFKFNEEEDARKTAKKAQAREYGYEEDKSDSDSDEGGVRKAGGDLAAQAIANAHA  
AAALVANKAANNANQQIPGSATAPLIPLLTASNQQNDEATARALQAAMNLQQNLARIQAH  
AVPEHYEAELEINDFPQNARWRITHKETLAPIQDWTGAAITTRGTYPQGIKIVGANERKL  
YLFIEGPTESSVKKAKAELKRVLEDCANQALNLPGSAQTGKYSVI

>ZmG030873

MVAMARKDEEEGPADRVPHLPWMRYPVDIDTFSGRPVTQLPRLDPRLVEALQRMGIESFF  
PVQEAAWLETIGPGA FERDICI NSPTGSGKTLAYALPIVQMLCTRKVRCLRALVVLPTRD  
LALQVKEVFDIAIPVVGLSVGSVAVQSSIADEVSSLVQKPRQEFYPTIDKEYVQMEPRTK  
IDILVATPGRLMDHINMTNGFSLEHLQYLVIDETDRMLREAYQSWLPTVIQLTHSIGQDH  
SCHDIDGKTLHPLTTIRRSGVERGFKSKCYPRLAKIVLSATLTQDPSKLSQLELHHPLL  
LNSGKKRYRIPTKLESYKLIKSNLKP LSLIVLLQELQGNKCLVFTSSVESHRLSTLLR  
FFENLPFKFSEYSRLQRESTRRKTLEAFKEGKIDVLI GTDRMARGIHIDGLRYVINYDMP  
PYVKTYIHRAGR TARAGESGSCFTFLRKHEVKTFDKMLKKADNAGCNLHSLPEESIETLR  
PAFSGALRKLEGALESEAVKKYDLGDKTPGASKRKRPNQLCKQ

>Zm2G035807

MRSSWADSVANAEE SAPATAAANGSVANHSNSRPTRSSYVPHLRGRSAGAAVGAQAGSV  
APAQGGPLPLAAAQPSGQAVVGGPRWAGIVNGGGGGSVGAPRQGYGGGGGGGGRGAWNS  
RPGGWDRRDREPDPFKAEAEAEVDFDQENTGINFDAYEDIPVETS GHDPVPVNTFAEI  
DLGDALNENIRRCKYVKPTPVQRYAIPIS IAGRDLMACAQ TGSKTA AFCFPIISGILKS  
PKPHQRSRSTRACPLALILSPTRELSVQIHEEARKFAYQTGVRVVVAYGGAPITNQLRE  
LERGVEILVATPGRLMDLLERARVSLQMIKYLALDEADRMLDMGFEPQIRKIVEGMDMPQ  
RGERQTM LFSATFPKEIQORMAADFLADYIFLAVGRVGSSTDLIVQRFVFLDSDKRSYLM  
DLIHAQKANGTHGKHALTLVFVETKRGADALEDWLFRNGFPATS IHGDR TQQEREHALRS





SFHASYGNSSQNNQTDGNPSPFPSSSNNQSGDGLSFHERFYGSRGRDESRSNNDGFRARS  
RSPGKPVEVSNW

>Zm2G075027

MANGDAAVEVGGNGEQEAAARQASTFAELGICAEELVEACDAMGWKEPTRIQAEAI PHALQ  
GKDLIALAQTGSGKTGAFALPILQELLSNRQAEQSFFACVLSPTRELAIQIAEQFEALGS  
AIGLRCSVLVGGVDRVQVLSIGKRPHIVVGTTPGRLLDHLTETKGFSLKKIKYLVLDEAD  
KLLNVEFEKSLDDILSEMPKDRRTFLFSATMTKKVKNLQRACLRNPAAKVEVSSKYSTVDS  
LKQEFYFVPPADDDCYLLHVLNERLESMMIMIFVRTCESTRLLALMLRNLGLKAMISGQM  
SQDKRGLGALNRFKAKDCNILICTDVASRGLDIQGVDMVINYDIPMNSKDYVHRVGRARA  
GRSGYAVSLVNQYEAQWFLVIEQLLGKKIDQCKVDRDEVLIILKGPISDAKRIALTKLKDS  
GGHKRRNVGDDDEEVEDHSSHSRRPKSLKRSNRR

>Zm2G076484

MGRNLPAEQVEAPRSSKMDKKRKKDKKRKLAAEAEAEAAVTATVETVKSSKKKRVENEPG  
AGAVEAENGAEKTVAVTGGKSEDPKYAPLRSFSAELPSQVLECCSAFARPSPIQAHAWP  
FLLDGRDFIGIAATGSGKTIAGVVPALMHIRKKVGGKAGKKAVPRCLVLSPTRELAQQIA  
DVLSEAGAPCGIKSVCLYGGTKKEPQISALKSGVDIVIGTPGRMKDLIEMGVCCLNEVSF  
VVLDEADRMLDLGFEPVRAILSQTSSVRQVMVMSATWPLAVHKLAQEFMDPNPIKVVIG  
SEDLAANHDVMQIVEVLDDRRTRDSRLALLDKYHQAQSNRVLVFLVYKKEAARVETMLQR  
RGWKAHSVHGDKAQHDRTKALSFLKEGKCPMLIATDVASRGLDIPDVEVVINYSYPLTTE  
DYVHRIGRTGRAGKKGVAHTFFFTQANKALAGELVNVLREADQVPPALMKFGTHVKKKES  
KIYGSHFKELTADAPKSTKITFGDSEDED

>Zm2G083580

MENTKLSSALFAGTHFDRKRFAADFARFRKGPALPSAATPSAPSPEKKRKRKSGKAKAKK  
NKKRAQDAAAAASSDFVEGFSVFKGLADNNAELRSEKVDMRKDDDSVAVRRRKEIEREFE  
RAAVLRKRFDIHIAGQNAAPAPLESFEELISRYGCDSYLVGNLSKLGFEPTPIQRQAMPI  
LLSGRECFACAPTGSKGTLAFLFPLLMKIKPGSKGGVAVILCPTRELAQTVRECKKLV  
KGRKYYIKLMTKELSKSGNFKDMHCDILVSTPLRLDHAVKKRDLDLSSVEYLVLDESCKL  
FELGFVEVVDVSVVEACSNPSIIRSLFSATLPDSIETLARTIMHDAIRVIVGRKNSASSLI  
KQKLIFAGTERGKLLTLRQNFQESLNPPVLIQVQSKERAKELYKELAFDDIRVDVIHADL  
SEQQRQDAVDNLRAGKTWVLIATEVIARGMDFKGVASVINYDFPESAAAYIHRIGRSGRA  
GRSGEAITFFTEEDKPFRLNIANVLVSSGCEVPSWIMALPKLKRKKHRVDRDPISYLPDE  
V

>Zm2G085587

MEQGENQSADSFVVSSDNELEDLPVKERCFEQREALPGEPRCVVCGRYGEYICDQTDD  
DICSVECKTILLSRIVAKTKPAVKAARKVNLPLGDESFCIKDINFPNILTADSRISLRL  
SKLDICVKGDVAVPDPIMCFSACGLPEKLVHNLLETAGYCMPTPVQMQUIPASMSNRSLLSV  
ADTGSKGTASFLIPIIAHCSRLRSQECTGNQGPLAIVLAPTRELCLQVEEQAKVLGKGLP  
FKTALIVGGDPLPQQIYRIENGVELIVGTTPGRLIDLMLKHNVDLTYVSVFVLDEVDCLE  
RGFRDQAMQIFQSLSHPQVMMFSATIHSEVEKMSNSLANNVISISCGNPNRPNKLVKQV  
IWESEKKKKQKIFEIMSKQHFKPPAVVFSRVGADLLSEAITVATGLEVVSIHGEKTM  
IERRENLRRLFTGEVSVVSTGVLGRGMDLLKVRQVILFDLPNSIDEYIHQVGRASRMGE  
EGMAVVFVNEEDRRIFKELVQVLKTAGAPIPREIANSRYTAGVYVGSERKRKLSRSRS

>Zm2G086116

MHQPRARYPPGYSGGGGAGRGGGGGNGGGGNNHNYGRNPQQHHYHQQQSQHSHRNS  
SYQQQWLRDQAPAVAGAASGNAVAKTASQLDAVGSSSQDWAQLNIPAPDTRYRTEDVT  
ATKGNFEDYFLKRELLMGIYKGFERPSPIQEESIPIALTGSDILARAKNGTGKTA AFC  
IPALEKIDPEKNAIQVVILVPTRELALQTSQVCKELGKYLNIQVMVSTGGTSLKDDIMRL  
YQPVHLLVGTTPGRILDLTRKGCIVLKDCSMLVMDEADKLLAPEFQPSVEALIHFLPPSRQ  
LLMFSATFPVTVKEFKDKYLPRPYVINLMDELTLKGITQYYAFVEERQKVHCLNTLFLSKL  
QINQSIIFCNVNRVELLAKKITELGYSFCYIHAHMLQDHRNRVVFHDFRNGACRNLVCTD  
LFTTRGIDIQAVNVVINFDFPKTSETYLHRVGRSGRYGHLGLAVNLITYEDRFNLYRIEQE  
LGTEIKTIPPQIDLSIYCQ

>Zm2G088218

MHRDAHMSFVLLTVAASMGEAKDNEVEEDLVYEEEEEVENVIDGAPTINGSSDVVKKGY  
VGIHSSGFRDFLLKPELLRAIQDCGFEHPSEVQHECIPQAILGMDVICQAKSGMGKTAVF

VLSTLQQIDPVAGQVAALVLCHTRELAYQICHEFERFSKYLPPELRVAVFYGGVHIKNHKD  
LLKNECPHIVVGTGPRILALARDKDLPLKNVRHFILDECDKMLESLDMRRDVQEIFKMTF  
HDKQVMMFSATLSKEIRPVCKRFMQDPMEIYVDDEAKLTLHGLVQHYIKLSEAEKNRKLN  
DLLDALDFNQVVFVFKSVSRAAELNKLCECNFSPICIHSGMTQEERLTRYKNFKEGHKR  
ILVATDLVGRGIDIERVNIIVVNYDMPDSADTYLHRVGRAGRFGTKGLAITFVSSSDSDVL  
NQVQERFEVDIKELPEQIDTSTYMPS

>Zm2G090869

MSKRPKLEGFSIPRPTSYNFERSQPVQRLYRPTDDPDLDIAFSDDAPSDAPAGTAVDVK  
AEHDEEIDPLDAFMAEIQEEIRAPPPPKAEALRRADSGDDEDDPVESFLRAKKDAGLTL  
AADAMRAGYDSDEEVYAAAKAVDAGMMEYDSDNPIVVDKKTIEPIPALDHSTIEYDTFT  
KDFYEEKPSISGMSDQEVADYMKSLAIRVSGFDVPRPIKNFEDCGFPVPLMNAIAKQAYQ  
KPTTIQCQALPIVLSGRDIIIGIAKTGSGKTAAFVLPIMIVHIMDQPELEKEEGPIGVICAP  
TRELHQIYILEAKKFAKPYNLRVAAVYGGVSKFDQFKELKAGCEVVIATPGRLIDLKMK  
ALKMFRATYLVLDEADRMFDLGFEPQIRSIIVGQIRPGRQTLFSAATMPYKVERLAREILT  
DP IRVTVGQVGGANEDIKQVVNVI PSDAEKMPWLEKLPGMIDDGDVLFVASKKARVDEI  
ERELNQRGFRI AALHGDKDQASRMETLQKFKSGTYHVLVATDVAARGLDIKSIKTVVNF  
IAKEMDMHIHRIIGRTGRAGDKDGTAYTLITQKEARFAGELVQSLIAAGQDVPNELMDLAM  
KDVRFRAKRDSRKGKGGKGGKGGVGGGAGRGRGVRGVDFGLGIGYNAESGSQVPAPRSA  
AINSLKTGVMQQFKSSFVSGSSNTPSSAPSLVRPALRGFVSGGTIGGDTRPAQPAPTFV  
TASWPAQAAPSVPASRPAAGNNNENGNPNPKSSRDRPRERKRPSGWDR

>Zm2G099253

MEVDGEAQHFRFLFSKRAKPKLKPEVQPQPEPEPPSRDPAAAEAYLDPAPTIVTETGQADD  
AADAAGTAPATFADLGLSQWLVDACEALGMRRPTAVQRRCI PRALAGADVLGIAETGSGK  
TAAFALPILHRLGEDPYGVAALALAPTRELAAQLAEQFRALGAPLGLRCLAAIGGFDSL  
QAKGLSRRPHVVVATPGRIATLVKNPDLAKVFSRTKFLVLEADRILDVNFEEELRVIF  
GCLPKKRQTFLFSATMSDNLRSLLELSGNKSYFFEAYEGFKTVETLKQYIHVPPQKEL  
HLWHLLSVMKGKTEDPIRSAIVFVSTCKDCQYLDLLEELRYPAVALNSHKSQAQRLSAL  
NRFKSGQVPVLLATDVGSRGLDIQTVDLVINYDMPMCVYTYLWIYMQYIKIVCQHFF

>Zm2G099914

MCPAAATTSSAKPSKRRKQPVIIAPPESDSEEEVSVDYDASDDDEEEETQELESEDVDEEV  
EEGSEGGEENEIGDDSEVEVEVEVEVEVEVEVEVEVEVEVEVEVEVEVEVEVEVEVEVE  
KKEEEKVMEDKKEEEKAKKKSESGSILSNKLFSELPLSELTAKAIREMNYTHLTQIQ  
RSIPHLLLEGNDVMGAAKTGSKTLAFLIPAIEMLYHHTFSPRNGTGAIVVCPRELAIQT  
HNVAKELMKYHSQTLGYVIGGNRRSEADQLAKGINLLVATPGRLLDHLQNTKSFYRRL  
KCLVIDEADRILEQNFEEDMKQIFKRLPQNRQTVLFSATQTPVEVEKFAKLSFEKNEESK  
KPVYVGVDDDKSKATVEGLQGGYCVISSDKRFLVLYAFLRKRKRNKIMVFFSSCNSVKFH  
AELLNFLGIECSDIHGKQKQKRTTFFSFCKAEKILLCTNVAARGLDIPVDYILQYD  
PPDEPKDYIHRVGRTARGEKKGKSALLFLLPEELKFLIYLKAAKVTLTEYEFNQKNVNL  
QSQLENIVGENYFLNQSAKEAYRSYVLAYDSHSMKDI FNVHQLDLQKVAASFQKPNPKV  
NLDLDSAAKHRKMRVDDGGKRHGISASNYPYGRKDKGGAGDKRQLARF

>Zm2G100043

MALHHLRLAPLALLRAASLPPLASSRIAARGHRRVLLFAPPSWPWRLLSPGARPRALATA  
AAEADDATSGSGNEFFAESTSWASLGVSERLASALCSAGLSRPSLVQATCIPHVLMANDV  
IVAAETGSGKTHGYLVPLIEKLCSSSTTKDDNCQDTPGAHDMVLVLCNVMLCEQVVR  
MANSLLDESGKPLKRAAAVCGPNGWPAVHPDILVATPAALLNYLFDYDPEKRRRERFRN  
VKFVVVDEADMLLCGSFENQVIRLINMLRFDEKLLSRAQDSGKDISLGSDDYHEDSKFE  
TAEFGSSDKEIEDNIVEDRLVKLENSHVGAHKDWRVRKIYRRSKQYVFAATLPQSGKK  
TAGGVLQRMFPDAVWVSGTYLHRHNRLERRWIEVTADTQVDALLNAVKYGLKSEVHDAK  
DVPRRTMVFTTNTVDAANSVSDILHRVGIPICILYHRESSLKERANLQSFRENGGVLVCTD  
AAARGLDVPNVSHVIAEFAACAVDFLHRVGR TARAGQSGIVTSLYTEANRDLVRAVRQA  
EELAQPVEGAFSRKRSFRNKLKQALQKREALLS

>Zm2G107984

MYAVLRRRAAPLRRRAVSALATALLQQQPAALDAVARRAPLPAAAWFHSSPAWLGFRETGA  
AGAAARAEFAADNGSFYEEDKRAAAGGGAAAEGLIEAKLGISSKIVERLASKGITKLFPI  
QRAVLEPAMQGRDMVGRAKTGTGKTLAFGIPIMDAIRHNEKYKPGKFPLAIVLAPTREL  
AKQVEREFLDSSPLETLCVYGGTPIMQQIRKLNLYGVDVVIIGTPGRVIDLLKRGSLSLAEI

RFVVLDEADQMLSVGFDLVETILERVPPQRQTLMF SATMPTWIRKLTQKYLNNPVTVDL  
VGEDDQKLAEGISLLAVSSENREKPAVLGELIKEHAKGGKCIVFTQTKRDADRLSHNMSR  
SFQCEALHGDISQSQRERTLAGFRDGRFNIL IATDVAARGLDIPNVDLVIHFELPNSSEL  
FVHRSGRTGRAGKKGTAIMVNYDQSRVAVRIERDVGCKFTELPKITVDGSDLLSGGFDS  
FGGGYSGSNYGRSGGGFGRSGGGYGN SGFGHSSGGYGRSGGGGF GDSGFGGRS  
GGGGGF GDSGFGGQSGGGGGF GDSGFGRTSGGGSGFGRSGGGF GDSGSGRFGGGF GGS  
GSGGFGDKNSR

>Zm2G113267

MMEVAGAQAARVPLLLRNTASLRTSVSVSCTGSRRSWVAATAEGDETRGFDPKVPMDTPG  
AYRLVDRDTGRSVIVWGGTDDSD EASMPSPAVLSRTTDRRHSQGVGGGTGIGNFGRFKAQ  
KIKSLVTRSAHRKRESSNRSSTAWSDESSFN GSDDEEESYFERRKHVSDSERHPKMSSGS  
RDGRTRSAHSLSSVLSQYRGDDDTDFPGSEATSGSKRWGNVADV TYGRQNQKQREPLNFP  
QRKGPLDGGFFSRRSFKEIGCSDEMLGALRNDFDFRPSHIQAMAYGP ILEGRSCVVADQS  
GSGKTLAYLCP I IQNLRNEEVQGLHKSSPRNPRVIVLTP TAE LASQVLNNCRLISKSGVP  
FRSMVATGGFRQKTQLES LDQELDVI IATPGRFLYLLQEGFVQLANLRCVVLDEVDILFG  
EEGFEQVLHQLITVAPVTTQYLFVTATLPLDIYNKVVETFPDCEVIMGPGVHRTSSRLEE  
ILVDCSGDDNEEKNPETA FSNKKTALLK IIEESPVRKTI VFCNKIETCRKVENALRRVDR  
KASQIKVLPFHAALDQAQR IANIKIEFLNKQTADSMFLVCTDRASRGIDFANVNHVVLFDY  
PRDPSEYVRRVGR TARGASNGKAFVFAVGKQVSLARRVMERNMKGHPLHDVPCV

>Zm2G125935

MRRPQRRVAAKQTRLREVDEIRLLNEWIDAGKPLPRTKLLPSPKSAGPVPTAGEHPEYGA  
CTLFDELPLSQKTKDGLRKAGFTEMSEIQRAALPHALCGRDILGAAKTGSGKTLAFVIPL  
IEKLYRERWGPEDGVGCIILSPTNDLAGQIFEVIKKVGQFHNFSGGVIVGKRKGIEIEKE  
RVNSLNLVCTPGRLVQHFNETANFDCSQLQLLVLDEADQILDHGFRNQVDAIISQIPKV  
RQTLFSATQTKSVKDLARVSLRDPEYISVHEEARTATPD TLEQYAMIVPLEQKLNMLWS  
FIKRHLNSKTI VFLSSVKQVKFVYEIFKCLRPGIPLKCMHGRMKHVQQAIVADFNEATS  
VLFSTDITSRGLDIKNVDWVQVDCPENIDNYIHRVGR TARYNKKGKSLIFLCP EEEAML  
EKLKATESKIP IHIRKPKAEQLEQISQS IASVLVKFPNLQELGKRAFVTY LKAVYLQKDK  
KVFNLSRFSAEQFAAYAASLGLPVTPKIRFISHKKNVSKKDMEDIDMKQMKSSLEHEVTI  
TPKINIDLTLCDGDDDI LYPKKPTADANMDDR LDDVLHPKESATDTNVTGLERPFKKKKL  
KINVNRPSGTRVKYDDEGNAIPPLASVAEEVSL EPPVHKDKISQRYAEMLRMQKHDKED  
KLEHKKTLREKKLQKKMKLKRKRQEDTGAGSEEDSGSESDRGQDTANKGKKRYFNSDDED  
NDAAKDGDVLAQQEALALKLLSNMHS

>Zm2G129007

MHQPRARYPPGYSSGGGGGGGGSGGGRGGSGGGGNHNYGRNTHPQHQHYYQQQQQHS  
HRNSSHQQLRRDQGPVAVAGPVSIGNAVPKTAPQLDAVDSSSQDWKAQLNIPAPDTRYRT  
EDVTATKGNFEDYFLKRELLMGIYEKGFERPSP IQEESIP IALTGSDILARAKNGTGKT  
AAFCIPALEKIDPENNAIQVVILVPTRELALQTSQVCKELGKYLNI EVMVSTGGTSLKDD  
IMRLYQPVHLLVGT PGRILDLTRKGCIVLKDCSMLVMDEADKLLAPEFQPSVEALIHFLP  
PSRQLLMFSATFPVTVKEFKYLRPRYVINLMDELTLKGITQYYAFVEERQKVHCLNTL  
FSKLQINQSIIFCNSVNRVELLAKKITELGYSFCYI HAKMLQDHRNRVFDHFRNGACRNL  
VCTDLFTRGIDIQAVNVVINFDFPKTSETYLHRVGRSGRYGHLGLAVNLITYEDRFNLYR  
IEQELGTEIKTIPPQIDLAVYCQ

>Zm2G129554

MDTAEAEAGQEVVSAVGEDSIPEAAACSREERKEEEEEVEVSFDELGLDEQLKRALRKKG  
ILKATPIQREAIPLILEGKDVAKAKTGSGKTFAYLLPLLHELLKLSSEGRIRKPAPNAF  
ILVPTRDLC HQVYNEALSLELCTCKLRVVQVTASMSDKDITVALSGPPNIVSTPACVA  
TCISKGIIRGPAVKESLSMMILDEADLLLSYRCEVDL KALIPHIPRSCQSILMSATSSSD  
VDKLTKLLLNHPFVLTLESEVQAKDDVIPKNVQQFWISCDAKDKILHILALLKFELIQKK  
VLIFVNSIDMAFRLRLILEKFGIRSAVLNAELPQNSRLHIIEAFNARLFDYLIATDDTKT  
KEKQTNEENKKEATLSRKRKKTQTNKENQKEQKVS RKHLQQTLD AEFGVVRGIDFKNVFTV  
VNFDMPLDATGYVHRIGRTGRANKTGASISLVSPKEDSTFKEIEHMLQDVEKKDMDCISP  
FPLLTKDAVESLRYRAQDVARSVTTRDVQEARRQDIKNEILNSEK LKSHFEENPTDLDLL  
KHDKLLCNKEIPAYLRDVPDYLIDPKTKEASNAVKLSRAAMHIDKPQRKRQGFKGGSGK  
SRDPLKTFSAEGKRGRRRKEREGEPDRRKS SKA

>Zm2G138041

MLAEDGFRSDSERMMRDIQRSAGGCQVLLFSATFNDRVKDFVTKVIRDGNQIFVKKEELT  
LEKVKQYKVPDESAKIEVIRDKIFEFGQKVGQVIIFVVRTKQSTKNVHNALTREYDVC  
SIQGSLDQSEREKIQEFKDGTYTKVLIISTDVLARGFDQAQVNLVINYDMPKIFGTRDEPD  
YEVYLHRIGRAGRFWPER

>Zm2G143246

MSRYDGRAADAGSYDRRSEGAFFGGGSRAFSAPSKADASAAASELDGLPRFEKNFYVES  
AVAGMTEEEVEAYRRREITVDGRDVPKPVREFRDVGFPEYVLQEIITKAGFVEPTPIQSQ  
GWPMLALRGRDLIGIAETGSGKTLAYLLPAIVHVNAQPILSPGDGPIVVLVLAAPTRELAVQI  
QQEATKFGASSKIKSTCIYGGVPKGPQVRDLQKGVIEVIATPGRLLIDMIESHHTNLRRT  
YLVLDDEADRMLDMGFEPQIKKIVSQIRPDRQTLYWSATWPKEVEQLARNFLFDPYKVTIG  
SEDLKANHAIVQHVEILSESQKYNKLVNLLLEDIMDGSRIILIFMDTKKGCQDQTRQLRMDG  
WPALSIHGDKSQAERDWWLSEFKSGKSPIMTATDVAARGLDVKDVKYVINYDFPGSLEDY  
VHRIGRTGRAGAKGTAYTFFTAANARFAKELINILEEAGQKVSSELAAMGRGAPPPSSGY  
RDRYRGYGGGRSWS

>Zm2G149520

MSPALAAAGVEPMAVDDSSASKKAKRQKLKAAAAAAEAEAEASVKKKKEKKEKKRKRKVEPSP  
PLPSAASSDEEEKSSTSSEETAPAAKKAKEKTKKNVDVSSASDDDDGEITASSDEDPADP  
NALTNFRISSESLRQSLRSKGIKSLFPIQATTFDLVLDGSDLVGRARTGQKTLAFVLPIL  
ESLVNGANKASRRTEHGRTPSVLVLLPTRELANQVHADFEFYGATFGLSACCVYGGSPYR  
PQEMALRRGVDIVVGTTPGRVKDFIVKGTNLKCLKFRVLDEADEMLNMGFVDDVELILGK  
VEDATKVQTLFSATLPEWVNLKSMRFLKVDRKTVDLVGNEKLLKASASVKHLALPCNKAA  
RAQVIPDIRCYSHGGRITIFTETKDSASELSGLIHGSRALHGDVAQAQREVILAGFRSG  
KFQVLVATNVAARGLDINDVQLIQCEPPRDVEAYIHRSGRTGRAGNTGVAVMLEYEPYK  
HSVSRLLERESGVKFEHISAPQPTDVAQSAGSEADAIASVSDSVIPIFRQQAEQLLSSSS  
LSAADLLAKALAKAVGYTDIKRSLSSLEDYSTLHLQGTGRPMWSPGFAFTILKRFMPED  
KLADVKGATLTADGTGVVFDVPAADVEDYIQASESAAQVTIDEVKQLPPLQEKDQSRGNS  
GGGRFGHGGRRFSGGGGGRGFSGRGGGRGFSGRGGGSRFNRRN

>Zm2G163072

MASLTLPALALALSNGAVRLRAAAFRCWALRRRGWAAAGALASPNSVLSEHAFKRLQLG  
SDDEDGEGPYGSDADEGFEAGEGDNEELAIARLGLPDELVATLEKRGITHLFP IQRAVLI  
PALEGRDLIARAKTGTGKTLAFGIPMIKQLIEQDDGRITRRGRTPRVLVLAAPTRELAKQV  
EKEIKESAPKLGTVCVYGGVSYNVQONALSRGVVVVGTTPGRIIDLINGGSLQLGEVQYL  
VLDEADQMLAVGFEEDEVETILQQLPAGRQSMFLSATMPSWVKKLSRRYLNNPLTIDLVDG  
QDEKLAEGIKLYAIPLTTTSKRTVLSDLITVYAKGGKTVFTRTKKDADEVSLALTNLSIA  
SEALHGDISQHQRERTLNGFRQKFTVLVATDVAARGLDIPNVDLI IHYELPNDPETFFVH  
RSGRTGRAGKAGTAIMFTSSQKRTVKSLERDVGCNFEFISPPSIEEVLESSAEHV IATL  
RGVHPESTKYFLGAAEKLTEELGPHALASALAHLSGFSQPPSSRSLISHEQGWTQLTR  
EQFGFRGFFSPRSVTGFLSDVCSAAADEVGKIYLTADENVQGAFFDLPEEIAKDLLTMEL  
PPGNTLTKISKLPALQDDGPATDSYGRFSNDRGSRNNRRSRGGGASRGRGGWDTDGEDRF  
RRGGRSLRSDNDSWSDDDWSGGGRKSNRSSSFGRSSSYSSRGSFSFGGRSSSFGGRESN  
RSFSGACFNCGESGHRATDCPNK

>Zm2G175867

MAMAGAAAAAAGRCLLLSRPSPLRLRLHHAALSTAAPT LGPTSTPAPPPRHELLLERLRL  
RHLKDASSPGAPRPTSRSSESSQGGKGRVEAAESFEELGLGEEVMSALGEMGISKPT  
IQCVGVPVAVLAGTSVVLGSHGSGKTLAYLLPLVQLLRRDEAMLGMSMKPRRPRAVVLC  
TRELTEQVYRVAKSISHHARFRSTMVSGGTRLRPQEDSLNMPVDMVVGTPGRILDHIKDG  
NMVYGDIKYLVLDDEADTMFDQGFDPDIRKFLAPLKNRAAKPDDQGFQTVLVATMTKAVQ  
KLIDEEFEGIVHLRTSSSQKRVSTARHDFIKLSGAENKLEALLQVLEPSLAKGNKVMVFC  
NTLNSSRAVDHFLTENHISTVNYHGEVPAEERVENLNKFRNEEGDCPTLVCTDLAARGLD  
LDVDHVIMFDFPSNSIDYLRHTGRTARMGAKGVTSIVAKKDALATRIEEEAMKKNESLE  
ALTTNNVRRPTSSQSVNTKGRPSRLVKTSNALKVVSQKGRRGVSLSSRSSRAPKDTTSTR  
RRSPPKSQAKATKSSAPRKAKPVKPTQSSAKVSKKAKPEGRRSKSDTLNKLGTKLSVVG  
FRGRSSGKSAQSS

>Zm2G303752

MAASTAAAARKGALTDQRFSELSPALSPVEVEALDRGGFQRCPTPVQAAAIPHLLSHKDV  
AVDAATGSGKTLAFIVPVVEILRRRSSPPKSHEVLALIIISPTRELSSQIFNVAQPPFFATL

NGVSSMLLVGGLDIKAEKLVVEEGANILVGTTPGKLFDIMHTDALEYKNLEILILDEADR  
LLDMGFQKHINFILSMLPKLRRTGLFSATQTKAVADLSKAGLRNP IRVEVKTEAKSTSKD  
AGQQELGPSITPLGLRLEYMICEASKSSQLVDFLVQNSGKKIMVYFATCACVDYWAUVL  
PLIKSLKGSPIIAYHGKMKQSLREKALASFSALSSGVLVCTDVAARGLDIPSVDLIVQYD  
PPQDPNVFIHRAGRTRYDQEGDAIVFLLPKEDTYVEFLKLRGVPLTERECLANTDDVIP  
QIRSAALEDRNVMEKGLRAFVSFVFRAYKEHHCSYIFRWKDL EIGKLAMEYGLLQIPSMPE  
VKHHSLSLEGFISVDDVDITQIKYK

>Zm2G362850

MNPYDLRFADPSSYHRRSDLTVAPTFAPPAPVAAANLNPYAAAYPLPVPVPAAPAGG  
DYQRYGQGGRRGGGGGGGGGGGGGGGGGGGGRRDGLDSLALPKPDFRSLIPFEKNFYVE  
CPSVQAMSEADVAQYRRLRDITIEGRDVPKPVRYFQEANFPDYCMQAIKASGFVEPTPIQ  
SQGWPMALKGRDLIGIAQTGSGKTL SYLLPGLVHVGAQPRLEQGDGP IVLILAPTRELA V  
QIQEESTKFGSYSRTRSTCVYGGAPKGPQIRDLRRGVEIVIATPGRLIDMLEAGHTNLRR  
VTYLVLDEADRMLDMGFEPQIRKIVAQIRPDRQTL YWSATWPREVEALARQFLQNPYKVI  
IGSPELKHNSIQQIVEVISDHEKYPRLSKLLSDLMGSRILIFFQTKKCDKITRQLRM  
DGWPALSIHGDKAQAERDYVLAEFKSGKSP IMAATDVAARGLDVKDIKCVINYDFPTTLE  
DYIHRIGRTGRAGASGTAFTFFTHANAKFSRNLVKILREAGQVVPAL ESMSRSSNSTGG  
GNFRSRGGGFGNRGHMSGSNTFPLGGRRPY

>Zm2G403636

MASSRTSWADVADAEAPPPPPVAAPAAAANSGPARSSYVPPHLRNRPPAAAAAAPASAAPP  
PRSTAGLLTRTGGGSSFGAGGGGGGGGGRRARGGARWDREPDFADSAADAEVPPFDEHQNT  
GINFDAYEDI PVEMSGRDI PPPVSTFADIDLGDALNENIRRCKYVRPTPVQRHAIPISLA  
GRDLMACAQTGSGKTA AFCFPIISGIMKAPSAGRPQRGGGMGMRTAYPSALILSPTRELS  
MQIHEEARKFSYQTGVRVVVAYGGAPITQQLRELERGV DILVATPGRLVDLLERARVSLQ  
SIRYALDEADRMLDMGFEPQVRRIVEQMDMPLPGARQTM LFSATFPKEIQKMASDFLDN  
YIFLAVGRVGSSTDLIAQRVEFVQEADKRSHLMDLLHAQRDTGKQTLTLVVFVETKRGADS  
LESWLCMNGFPATS IHGDRNQQEREYALRSFKSGQTP ILVATDVAARGLDIPVAVHVVNF  
DLPNDIDDYVHRIGRTGRAGKSGLATAFFNDNNSSLARSLADLMQESNQEVPAWLLRYAA  
RPSYGGGGGRNRRSGGSRFGGRDFRNDSSSFGKGGSRGGGDY YGGGSSGGYGGGGHGG  
AGAPSAWD

>Zm2G407748

MAEPEPLPQVSSEPTTPPQEGSGRTKTKNKNR SKKQPKRAGADTDGLSSGASTMVEDPF  
FVLAGGKEGGFLDLEEIDEADFGIFGGVLDV GQSVEEAGKDHGKKKKKTKKRKRGGDGE  
GFSGDAALVVENDQVDVEKVEKVEDGEKGD KKGKRKMNMKKR KVKNEMNRESDEDVAS  
DKAEDMQDDTENMEQNEDELILGEDDVSAWRELRLHPLLLKAMRRLGFKEPTPIQKSCF  
PAAAHRGKDVIGAAETGSGKTLAFGLPVLQRLLEEREKATRLQOEDEKMEERS CGSPLRA  
LILTPTRELAQVCDHLKDVAKFLGIHVVP IVGGLSMEKQERLLKKKPEIVVGTTPGRLWE  
HMSMNNQHLVELHLSLFFILDEADRMIE RGHFRELQSI IEMPLTNGSDEQAARTMPNCE  
TVPILQIKKRQTFVFSATLALSSNFRKKLK RGLSTSKASTPDDVSSIEALSKQAGMKSNA  
EIVDLTKASILPEKLEESFIECSEEDKDAYLY ILSVHGQRTIIFCTSI AALRHISSIL  
RILGINVLTNHAQMQRARMKAVDRFRESENS ILVATDGFARGMDFDDVRTVIHYQLPHS  
TDVYIHRSGRTARKSLAGCSIALISPTDKSRFYS LCKSLSKENLQQFPVDHTYMSGVMNR  
LSLARQIDKIARKTSQENANKSWLQRNAESMGL ILDTSDSEEDHVQGHKKRKATSAHLQK  
LQQELSDLLQCPLQPKTFSRRYLAGAGVSPLLQKQLEELAKRNASNNSKSKNKG

>Zm2G415538

MQEQSLPLLLSGQDCILHAQTGSGKTLAYLLS I FSTIDFSRSSVQALVVVPTRELGMQVT  
KVARLLAAKACTVMALLDGGTLKRQKSWVKA EPPAIVATVASLQCMVERRAFSLQSMRV  
LVIDEVDFIFGSSKQVSSLR KILTSYSAASSRQTIFASASIPQHNRFLHDCVQHKWTKGD  
VVHVHVHPVQPMPSHLCHKYVIC TTKERMHVLLSLLERDAPKSAIIFVAGQSERSKKAGN  
PPSTMVVSDFLRNEYKGS LDVMLLEEDMNFNARAASFSEVKGRGFLLVSTDIASRGFDLP  
QTSHVYNLDLPKTATDYLHRAGRTGRQPF SRLELECCVTTLIT EEEHFVLRRFQNELKFH  
TQEEELPLMNCFPG

>Zm2G420865

MDPSFRFDPDSSDDEAAGAPPRGGPVQSPW EFWSSYAESVAAEHARRRTTSIDEKISLLRQ  
ERGNPVVDDSGSDVSGGEDDSDEEIEGESGDEE DELESEDEGGVEGGTDDEEIEGS  
GDEEAIGDREGDEDDGDEKGGGELGEEDDAHEEEDTVDQNDTSGPVDP SNFFSSSDRAS F

HANSFLELNL SRPLVRACEALGYQKPTPIQAACIPLALTGRDICGSAITGSGKTAAFSLP  
VLERLLFRPKRVP AIRVILITPTRELAAQIHSMV EKLAQFTDIRCCLIVGGLSTKIQEVA  
LRSMPIV VATPGRIIDHLRNSLSV GLEDLAVVILDEADRLLLELGFSAEIQELIRMC PKR  
RQTMLFSATMTEEIDELVKLSL NKPVRLEADPSLKR PATLTEE VVRIR RARESNQEAVLL  
ALCLKTFKRSVIFISG TKQSAHRLKIFGLSGMKA AELHG NLTQAQRLEALEL FKKKEVD  
FLIATDVAARGIDIVGVQTVINFACPRDV KTYLHRVGR TARAGREGYAVTFVTDDDRCLL  
KAI AKKAGS QLKSRIVA EKPVAE CARLIEQLEGOISII IREER VEREARKAEME IAKAEN  
MIAHKDEIYSRPKRTWFATEREKKLLAAA AKESLDHGKSTSGVISA KKAEDLRLKEKRRR  
EHEKNLPRKKRRRLEAQREMLEDEDEDEKTKENDRGKQPMKGQSLVDAAYRKAKSLKAASK  
RAPGARKGKKEKNERQHSEKAPNRHEEMRDLFQNDMSEWKQGRSSSKNNKFAPKKSRSNSF  
KSKARY

>Zm2G484452

MHHLNDVKDMTLC SVEYVVFDEADSLFSMGS AKHLHDILK KLS DTRQ TLLFSATLPSALA  
DFAKAGLRDPHTVRLDL DKKISPDLRLAFF TLRRE EKLAALLYLVRERISSEEQIIFVS  
TKHHVEFLNILFREEGLEPSLSYGAMDQE ARMIHISKFRARKTMLLIVTDVAARGLDIPL  
LDNVVNWDFSAKPKLFVHRVGRVARQGRSGTAYTFVTSEDMPYLLDLHLFLSRPLRPAPT  
EEELLKDM DGINMKIDQAI ANGESVYGRFPQTVL DLASDGLKEVISGCTELIALEKPCAN  
AFRLYLKTRSMPSKESIKRGSNQWLDVMKKKREVHEGIINLVHQKSS EDP RPEVEE VDDI  
PNWEKKEVC GKKRKLQNF RDEDYIISV P QNHHL EAGLSVRDNEGFVENRLDAAVLDLVD  
DEASGMQAQRSRYHWMKNKFVKLNAGDRVTATGKIKTEGGAKIKASATGIYKTWQQKTHK  
SINIGGKSGNFAEERTPSSGGYQRGNKKH FAGPWPQIYTKCQRALRNKEPRANAEEQAAE  
GNGNHAVEEQIGERREIPEEQAAARWERVQQRGWWER

>Zm2G703415

MAAQEAAAADSLGPRFAPDDPTLPAPWKGLIDGATLYYWNPETNVTQY EKPAATAGVPPPL  
SAGLPPATPAQVPE SAPVAFPQLNVQFGQAGQAGHQERPDQAAYPQAGQLGQQHTQQPAQ  
QQPFQQQQPFQ QHVQAQHQAS FQHVPYQQQQ THMPNQPHQYHSTHPQHMPYQHGLYMQPQ  
QQQQAPPYSYQADQQPQMRQTAYNQAQQPSV PQAAYNQSQSQQPMPQSSYDQGSQQPP  
MPQPSYNQGGVQPPMPQPSYNQGGQSMIPQSAYNQAQQPQIPHGAYNQSQQPLGDRIPQ  
GQGQHPQQSLSSHHPAQASQSPQVSQPQGP KMP TQQGQLQHGLPFTQH GK TPLSHGQQSP  
LLKDDDDGGVHEGKRTGFPLPLSQQRGQAPLPNQQLPSTHQHPGALSSQPNIPGVGGPFYP  
ARNLPDGPSSAETNNMGFMNSPAQMHQGGADTNYQKKPVSGHTV PNHVGPSPIRPPMGFD  
MGNSVGHFERDDPHSYGRFDGAKALQQQPKLAALPTSQNSMVMHNGPLYPRPDNFGGHNM  
APPHSVPNPNLGLPLIGTSVRPPSSMFAPPDFPSVSSADAYRQHHEVTAMGENVPAPFM  
TFEATGFPPEILREIHAAGFSNPTPIQAQTWPVALQNRDIVAIAKTGSGKTLGYLIPAFI  
HLRRCHNNPMLGPTVLVLAPTRELASQIQAEVVKFGQSSRVSCTCLYGGT SKVPQLRELE  
RGADIVVATPGRLNDILEMKRINLHQVSLLVLDEADRMLDMGFEPQIRKIVDELPNARQT  
LMYTATWPKEVTKIAGDLLRDPVQVNIGSIDELVANKSITQYVEVPPMDKQRRLEQILG  
DQERGSKIIIFCSTKMKCDQLARGIGRNFNAVSIHGDKSQAERDNVLNQFR TGRASVLVA  
TDVAARGLDIKDIRVVINYDFPTGIEDYVHRIGRTGRAGATGVS YTF FSEQDWKYACDLV  
KLLQGANQLVPPQLQDMAARSASGGPRNQASGMSRWDPGGRGFE PGGVGGPVGYGGVREG  
PGGFGGREGPGGLGVRES PAMFGGPGGFGDREGPGGFGSGHEGHGGFGGREREGPGGFVGR  
KGGPFGGRDGPSSGFGGRGQRGSGGFGSRGGASPGGFGGRGGRGDSPGFGGRGRGDFS  
GFGGRGRGDFSGGRGRGFGGRGRSDFRVSDGRGRYDNRRGFGDKGRDRS YSRSPDRV  
RARGYDRRSDRSISRSRSRSRSRSRSRSRSRSRSRSRSHSRSRSRDHGAAPERRPRA  
RSGFDVLPATGAAGPAPVPVPGPAAPPVPAPAPEQSLANTSSMSPMSPGGLVQPAAPAA  
GGQPSQGTGAAPSSPAGETFPGAAAQHPAPDV

>Zm2G026371

MASGDL LRAHAGAPVLARAFSCRLLPARRRSLGISPLAASKVGIADV VGRVRS GGADQ  
KRRRRDAKEGFGFGSVATRRELIDDEKVEQDEEDEALKLGVEKNGGETGGVDGSYLSETR  
FDQCAISPLSMKAVKDAGYERMTEVQEATLPIILQGDVLA KAKTGTGKTVAFLLP AIEV  
LSTLPHQRGQLRPPINLLVMCPTREL ANQVAVEARKLLRYHRTLGVQVVI GGTRLTQEQR  
SMQANPCQILVATPGRLKDHLENTPGFSTR LKGVKVLV LDEADRLLDMGFRRDIEKIAS  
IPRERQ TLLFSATVPEEVRQISHVAMKKDYRFINTVKEGDEETHAQVSQMYMVAPLDLHF  
SILYDVLKKHVAEDADYKVIIFCTTAMVTKLVAEVLSQLKLNIREIHSRKSQSARTKVSD  
EFRKSKGLILVSSDVSARGVDYDPDVTLVIQVGV PADREQYIHLRGRTGRKGKEGQGLLLL  
APWEKYFLGAVKDL SIAESAVPPVDSSVETEVS SMHYLFSTWLSDSVRNAVRKVEMKSKE  
CAYQAWLGYYNSNKTIGRDKSRLVHLAE EFSQSMGLAVPPAIPRNILRKMGLNVPGLRS  
S

>Zm2G080512

MISLLRRALAASASSPAATYRRLLVVAPLSRAAAPPGPCQAPAAAGSQEPPRRAFHCSTTP  
LGFRSTPASWAGPCPGEGEGEVDTGAEKGLEIARLGTSPRIVEKLAARGITRLFP IQRA  
VLEPAMQKDMIGRARTGTGKTLAFGIPIMDKILSYNEKTGNRNP LAI I LAPTRELARQ  
VEKEFRESAPLDTLCVYGGVPINQQMRALNYGVDIVVGTGPRVIDLLRRGVLNLSQIQFV  
VLDEADQMLAVGFDEDVEVIMEQLPQNRQSMLFSATMPSWIRKISNKYLKDPVIIDLVS  
FFYYLRVIFVLLSLACLVTIVHSFVCMYI

>Zm2G092327

MRSSWADSVANAEE SAPATAAANGSVATHSTSRPTRSSYVPPHLRGRSAGAAVEAQAGLV  
APAQGGPLPLAAAQPSGQGAAVGGPRWAGIVNGGGGGSIGAPRQGHGGGGGGRGAWNSR  
PGGWDRRDREPDFAKAEAE EIDFDGQENTGINFDAYEDIPVETSGHDVPAPVNTFAEID  
LGDALNDNIRCKYVKPTPVQRYAIPIS IAGRDLMACAQTGSGKTA AFCFPIISGILKSP  
KPHQRSRSTRTACPLALILSPTRELSVQIHEEARKFAYQTGVRVVVAYGGAPITNQLREL  
ERGVEILVATPGRLMDLLERARVSLQMIKYLALDEADRMLDMGFEPQIRKIVEGMDMPQR  
GERQTM LFSATFPKEIQRMAADFLADYIFLAVGRVGSSTDLIVQRFVFLDSDKRSYLM  
LLHAQKANGTHGKHALTLVVFVETKRGADALEDWLFRNGFPATSIHGDR TQQEREHALRSF  
KSGATPILVATDVAARGLDIPHVAHVINFDL PNDIDDYVHRIGRTGRAGKSGLATAFFNE  
SNTTLARPLSDLMKEANQEVPKWLEGYAARSAYGGGGGRNRRQGS SARFGRDFRRDRGS  
GGGYGGGSYGGGGGGYGGSSGYGGAYGGGGSGGGYGGGQSTSSWD

>Zm2G164956

MSPALAAAVEPMAVDD SASKKAKRQLKAAAAAAAAAE EEEAASAKKKEKKEKRRKAKEP  
SPPLPSAASSGEEKSSTSSEETAPTAKKAKDKTKKNVEVSSSASDDDGEITAGSDEDPA  
DPNALTNFR ISEPLRQSLRSKGIKALFPIQATTFDLVLDGSDLVGRARTGQKTLAFVLP  
ILES LVNGANKASRRTEHGRTPSVLVLLPTRELANQVHADFEFYGATFGLSACCVYGGSP  
YRPQEMALRRGVDIVVGTGRIKDFIVKGTNLKCLKFRVLDEADEMLNMGFVDDVELIL  
GKVEDATKVQTL LFSATLPDWNKLSMRFLKVDRKTVDLVGNELKASASVKHLALPCNK  
AARAQLIPDIIRCYSHGGRTIIFTETKDSASELSGLIPGSRALHGDVVQAQREVILAGFR  
SGKFQVLVATNVAARGLDINDVQLIIQCEPPRDVEAYIHRSGRTGRAGNTGVAVMLYEPR  
YKYSVSRLERESGVKFEHISAPQPTDVAQSAGSEAADAIASVSDSVIPVFRQQAQLLSS  
STLSAADLLAKALAKAVGYTDIKRSLSSMEDYATLHLQTRQMWSPGFAFTILKRFMP  
EEKLADVKGATLTADGTGVVFDVPAADVEDI IQASENAAQVTIDEVQQLPPLQEKQQQS  
RGNSSGGFRFGRGGGGRFSGGGRRGGGFGGGRRGGGGRRRRQ

>Zm2G415491

MASLVTLPAIAFNSPATASGAVRLRAAAFRCWALRRRGWAVAAA VASPNSVLSEHAFKRL  
QLGSDDDEEGPYGSDADEGFQGD EEE LAIARLGLPDELVATLEKRGITHLFP IQRAVLI  
PALGGRDLIARAKTGTGKTLAFGIPMIKQLMEQDDGRSTRRGRTPRVLV LAPTRELAQV  
EKEIKESAPKLGTVCVYGGVSYNVQQNALS RGV DVVVGTGPRIIDLINGGSLQLGEVQYL  
VLDEADQMLAVGFEEDEVETILQQLPADRQSMLFSATMPSWVKLSRRYLNNPLTIDLVDG  
QDEKLAEGIKLHAIPLTATSKRTILSDLITVYAKGGKTI VFTRTKKDADEVSLALTT SIA  
SEALHGDI SQHQRETLNGFRQKFTVLVATDVAARGLDIPNVDLI IHYELPNDPETFVH  
RSGRTGRAGKAGTAILMFTSSQKRTVM SLERDVGCKFEFISPPSIEEVLESSAEHV IATL  
RGVHPESTQYFLGAAEKLTEELGPHALASALAHLSGFSPPPSSRSLISYEQGWVTLQLTR  
EPGYGRGFFSPRSVTGFLSDVCSAAADEVGKIYITADENVQGA VFDLPEEIAKDLLTMEV  
PPGNTLTKISKLPALQDDSPATDSYGRFSNDRGSRNRRSRGGGASRGRGGWDTDSEDRYR  
RGGRSLSRSDNDSWDDWSSGGGRKSNRSSSSFGGRSSSYGSRGSPSPSFGVRSSSLGGRE  
SSRSFSGACFNCGESGHRASDCPNK

>AC1981694FGP004

TRAPCELVTGLNFEGKDNFGAVIDFTVRSEMRLSIGQVHRNVLALASSRSCFVLGDRVS  
FRMLSQPRVAGFHQTAWRGSQILEDNRGGPLTLASLEVQRVEYGGKGMERTGGPKPSS  
RASSLYVKPKVSSNVKPAKSALMKPAGIKKTLKVDEALFSAKSFEELGLPPLLVDQLNKE  
GLTAPTEVQSAAPIIAQKHDVVIQS YTGSGKTLAYLLPILSDIGPLKRTMEQDHSEKRS  
GIEAVIVAPSRELGMQIVREVEKILGPNDKRLVQQLVGGANRSRQEALKKNKPIIVVGT  
PGRISEISA ADEVQQLLSFN YREDMHRILEHVGRRPGGTSRDILGPLARRSERQ TILVSA  
TIPFSVIRAARSWGHPVLIRAKSVVPLDSITVPRPALSQSDANPSSSSQSVNQAAVGS  
PPSLEHYCTAKAQHKVDTLRRCIHALEAQT V IAFMNNTKPLKDVVFKLEARGIKATELH  
GDLGKLARSTVLKFKDGEFRVLVTNELSARGLDVPECDLVVNLDLPTDSTHYAHRAGRT



GRLGRKGIVVTICEESEGFVVRKMRKQLDVAIKPCEFTEGELVVHKEEDVE

>GRMZM2G104795

MYLTSCSRLAQPSKSSVALPESGESMYAAARVEVEADRKKEKVDETERMAREKKNTHEKE  
QIRKVVMGKRKRNEDELGMEEKQMIAEKEKEKEKVKKNGGGILTTKLFSELYISELTAKA  
IREMNYSHLTEIQARSIPHLMLGNDVLGSAKTGSGKTLAFLIPAIELLHKASFMPRNGTG  
VIVVCPRELAMQTHNVAKELMKYHSQTLGYVIGGTNMRNDANQLLKGINLLVATPGRLL  
DHLRNTSRFNYKRLQCLIIDADRILEQNFEEDMKQIFKRLPQDRQTVLFSATQNKVVE  
FANFTFGQNEERQKLVYVGVDDSKLKPTVEGLQQGYCVIPSEKRFLVLYAFLRRMQLRK  
EDLKVMVFFSSCSSVKFHAFLNFLGIGCYDIHGQQKQKRTSTFFQFLKEKNGILLCTN  
VAARGLDIPVDYIVQFDPPDDPKDYIHRVGRTARGDKGKGSALLFLLPEELKLLIYLQA  
AKISLTEYVFSEKHVPKSSQLEDDVGGNYFLNQSAAKAYRSYLLSYNSHSMKIDFDVHQ  
LDLKKVAASFCKNPPKVNLDLSSSSKHKRMRKADGANRHGIGPSTPYGRSGRYGSRQL  
ARF

>GRMZM2G156158

MSTSANPKLRRRGGLRKQGPYPTVATTGAMFAHEVGAEGPRRDTRQGPALPRVVATST  
RGGGAIEQAGDMEGSASKTDRSVHEAVGVDGTYLTETFRDQCAISPLSLKAIKDAGYER  
MTRVQEATLPIILQGKDVLAKAKTGTGKTVAFLLPALIEVLSALPRSTSINLLVMCPREL  
ANQLAAEARKLLKYHRSLGVQVIGGTRLPQEQRSMQANPCQILVATPGRLLKDHLENTPG  
FSTRIRGVKVLVLEADRLLDMGFRRDIEKIIITFIPKDRQTLVFSATVSEEIHQISHLAM  
RKDYDFINAVQEGDEETHAQVNQTYMVAPLGLHLPILYDVLKKHVAEDAEYKVI VFCTTA  
MVTRLVAEVLSQLKLNIREIHSRKTQSARTKVSDEFKRSKGLILVSSDVSARGVDYDPVT  
LVMQVGLPADREQYIHLRGTGRKGKEGQGILLAPWEMHFLSTVNDLSISEAATPSVDS  
SIQAAVKDAVRRVEMKSKESAYQAWLGYNSHKATNRDKARLVMLAEFFSQSIGLAVPPA  
IPKQILRKMGLSNVPGLRSS

>GRMZM2G368658

MAASMGEEIWGGAGGIKAVALVPLRSRFLVRGRLQGSTEKGKLGILLNRFKCLIIDR  
RILEQNFEEDMKQIFKRLPQDRQSVLFSATQTKKVQDFANFTFGKNEERQRKLVYVGVDD  
SELKPTVEGLQQGYCVIPSEKRFLVLYTFLRLKAREAQTAKAALRGEVGEQKKVKIMVF  
FSSCSSVKFHAELLNFLGIECYEIHGQLKQKRTSTFFRFLKEKSGILLCTNVAARGLDI  
PEVDYIVQYDPPDDPKDYIHRVGRTARGDKGRGSALLFLLPEELKLLIHLQAARISL  
TEYVFTEKHVPKSSQLENIVSGNYFLNKSAAKAYRSYLLAYNSHSMKIDFDIHLQDLK  
KVAASFCKEPPKVNLDLSSASRHRKMRKVFGGQSHGIGASNPYGRRGVYDRSKFARF
